# Supplementary material for: Diversity, distribution and dynamics of large trees across an old-growth lowland tropical rain forest landscape
Source: PLoS One. 2019 Nov 11;14(11):e0224896. doi: 10.1371/journal.pone.0224896 (PMC6844552; doi:10.1371/journal.pone.0224896)
Supplement: S2 Table — (CSV) [file pone.0224896.s002.csv]

* woody stem growth data from 18 0.50 ha CARBONO plots from 1997 to 2017
* plot_tree id is a unique identifier composed of a plot ID followed by an individual ID
* Plots were on old alluial soil (A1-A6), flat residual soil (L1-L6), and steeply-sloping residual soil (P1-P6)
* Firstcensus is the year an individual was first measured
* deathyear is the year an individual was found dead at census
* grow_year1 is the first year of the 1-year growth interval
* diagro is the annual growth in mm see Clark and Clark 2006Ecology 87:2132 and Ecological Archives E087-132 (http://www.esapubs.org/archive/ecol/E087/132/default.htm)
* precision of diameter growth measurements was assessed annually (N=1742 measurements, mean 83 per year) by remeasuring the same tree on consecutive or near-consecutive days
* 99.7% of the remeasurements were <=+2 mm; negative diameter growths of <2 mm were therefore not likely to be measurement error, but rather changes due to physical damage to the stem
* we screened diameter growths and the associated biomass and basal area growths for diameter growths <-2 mm (or 2 mm annualized to the intercensus interval) and omitted these from our analyses
* Bainc is the increment in basal area in m2
* eBMinc is the increment in estimated above-ground biomass (see definition of eBM below)
* Dia_year is the year of the given diameter measurement
* Dia_calc For trees with no change in Point of Measurement at any census this is the field-measured diameter
* Dia_calc For trees with one or Point of Measurement changes in their history this is the diameter adjusted for POM changes per Clark et al 2013 JGR-Biogeosciences 118:1�12 doi:10.1002/jgrg.20067
* BAsqm is the Basal Area in m2
* eBMkg_SB is the estimated above-ground biomass using the Sandra Brown Tropical Wet Forest allometry see text for details
plot_treeid	plot	forma	firstcensus	deathyear	genus	species	family	growth_year1	diagro	BAinc	eBMinc	dia_year	dia_calc	BAsqm	eBMkg_SB
A11	A1	P	1997	2016	Welfia	regia	Arecaceae	2013	0	0	0	2013	182	0.03	139.87
A11	A1	P	1997	2016	Welfia	regia	Arecaceae	2014	0	0	0	2014	182	0.03	139.87
A1100	A1	A	1997	2017	Dussia	macroprophyllata	Fabaceae	2013	0	0	0	2013	679	0.36	2960.89
A1100	A1	A	1997	2017	Dussia	macroprophyllata	Fabaceae	2014	2.86	0.00306	26.81	2014	679	0.36	2960.89
A1100	A1	A	1997	2017	Dussia	macroprophyllata	Fabaceae	2015	3.13	0.00336	29.47	2015	682	0.37	2989.02
A1102	A1	P	1997	2017	Welfia	regia	Arecaceae	2013	0	0	0	2013	166	0.02	109.79
A1102	A1	P	1997	2017	Welfia	regia	Arecaceae	2014	0	0	0	2014	166	0.02	109.79
A1102	A1	P	1997	2017	Welfia	regia	Arecaceae	2015	0	0	0	2015	166	0.02	109.79
A1104	A1	A	1997	-999	Pentaclethra	macroloba	Fabaceae	2013	0.98	0.0006	4.96	2013	389	0.12	870.6
A1104	A1	A	1997	-999	Pentaclethra	macroloba	Fabaceae	2014	6.67	0.00412	34.21	2014	390	0.12	875.67
A1104	A1	A	1997	-999	Pentaclethra	macroloba	Fabaceae	2015	4.17	0.00261	21.73	2015	397	0.12	911.57
A1104	A1	A	1997	-999	Pentaclethra	macroloba	Fabaceae	2016	0.97	0.00061	5.08	2016	401	0.13	932.41
A1109	A1	A	1997	-999	Rauvolfia	purpurascens	Apocynaceae	2013	0	0	0	2013	148	0.02	80.48
A1109	A1	A	1997	-999	Rauvolfia	purpurascens	Apocynaceae	2014	0	0	0	2014	148	0.02	80.48
A1109	A1	A	1997	-999	Rauvolfia	purpurascens	Apocynaceae	2015	0	0	0	2015	148	0.02	80.48
A1109	A1	A	1997	-999	Rauvolfia	purpurascens	Apocynaceae	2016	0	0	0	2016	148	0.02	80.48
A111	A1	A	1997	-999	Pentaclethra	macroloba	Fabaceae	2013	9.68	0.00806	69.21	2013	525	0.22	1695.89
A111	A1	A	1997	-999	Pentaclethra	macroloba	Fabaceae	2014	11.47	0.00974	83.83	2014	535	0.22	1767.38
A111	A1	A	1997	-999	Pentaclethra	macroloba	Fabaceae	2015	6.35	0.00548	47.26	2015	547	0.23	1855.11
A111	A1	A	1997	-999	Pentaclethra	macroloba	Fabaceae	2016	11.32	0.00994	85.77	2016	553	0.24	1899.78
A1110	A1	A	1997	-999	Jacaranda	copaia	Bignoniaceae	2013	21.53	0.01667	142.11	2013	482	0.18	1405.36
A1110	A1	A	1997	-999	Jacaranda	copaia	Bignoniaceae	2014	20.97	0.01696	145.23	2014	504	0.2	1550.58
A1110	A1	A	1997	-999	Jacaranda	copaia	Bignoniaceae	2015	15.64	0.01311	112.64	2015	526	0.22	1702.97
A1110	A1	A	1997	-999	Jacaranda	copaia	Bignoniaceae	2016	13.55	0.01167	100.51	2016	541	0.23	1810.98
A1111	A1	A	1997	2017	Pentaclethra	macroloba	Fabaceae	2013	3.91	0.00373	32.38	2013	604	0.29	2300.97
A1111	A1	A	1997	2017	Pentaclethra	macroloba	Fabaceae	2014	7.62	0.00733	63.75	2014	608	0.29	2334.07
A1111	A1	A	1997	2017	Pentaclethra	macroloba	Fabaceae	2015	2.09	0.00202	17.6	2015	616	0.3	2400.97
A1112	A1	P	1997	-999	Welfia	regia	Arecaceae	2013	0	0	0	2013	198	0.03	173.74
A1112	A1	P	1997	-999	Welfia	regia	Arecaceae	2014	0	0	0	2014	198	0.03	173.74
A1112	A1	P	1997	-999	Welfia	regia	Arecaceae	2015	0	0	0	2015	198	0.03	173.74
A1112	A1	P	1997	-999	Welfia	regia	Arecaceae	2016	0	0	0	2016	198	0.03	173.74
A1113	A1	A	1997	-999	Rinorea	deflexiflora	Violaceae	2013	0	0	0	2013	103	0.01	28.19
A1113	A1	A	1997	-999	Rinorea	deflexiflora	Violaceae	2014	0	0	0	2014	103	0.01	28.19
A1113	A1	A	1997	-999	Rinorea	deflexiflora	Violaceae	2015	0	0	0	2015	103	0.01	28.19
A1113	A1	A	1997	-999	Rinorea	deflexiflora	Violaceae	2016	1.94	0.00032	1.63	2016	103	0.01	28.19
A1114	A1	A	1997	2017	Casearia	arborea	Salicaceae	2013	0	0	0	2013	149	0.02	81.98
A1114	A1	A	1997	2017	Casearia	arborea	Salicaceae	2014	0	0	0	2014	149	0.02	81.98
A1114	A1	A	1997	2017	Casearia	arborea	Salicaceae	2015	0	0	0	2015	149	0.02	81.98
A1116	A1	P	1997	2016	Welfia	regia	Arecaceae	2013	0	0	0	2013	203	0.03	185.1
A1116	A1	P	1997	2016	Welfia	regia	Arecaceae	2014	0	0	0	2014	203	0.03	185.1
A1118	A1	A	1997	2016	Pentaclethra	macroloba	Fabaceae	2013	0.98	0.00071	6.03	2013	463	0.17	1285.7
A1118	A1	A	1997	2016	Pentaclethra	macroloba	Fabaceae	2014	4.77	0.00349	29.59	2014	464	0.17	1291.87
A112	A1	A	1997	2016	Rinorea	deflexiflora	Violaceae	2013	0	0	0	2013	135	0.01	62.3
A112	A1	A	1997	2016	Rinorea	deflexiflora	Violaceae	2014	0	0	0	2014	135	0.01	62.3
A1120	A1	A	1997	-999	Protium	panamense	Burseraceae	2013	1.96	0.00083	6.43	2013	268	0.06	366.45
A1120	A1	A	1997	-999	Protium	panamense	Burseraceae	2014	2.86	0.00122	9.5	2014	270	0.06	373.03
A1120	A1	A	1997	-999	Protium	panamense	Burseraceae	2015	4.17	0.0018	14.08	2015	273	0.06	382.99
A1120	A1	A	1997	-999	Protium	panamense	Burseraceae	2016	14.52	0.00649	51.05	2016	277	0.06	396.49
A1121	A1	A	1997	-999	Pentaclethra	macroloba	Fabaceae	2013	1.96	0.00214	18.77	2013	694	0.38	3102.87
A1121	A1	A	1997	-999	Pentaclethra	macroloba	Fabaceae	2014	4.77	0.00523	45.95	2014	696	0.38	3122.05
A1121	A1	A	1997	-999	Pentaclethra	macroloba	Fabaceae	2015	2.09	0.0023	20.22	2015	701	0.39	3170.26
A1121	A1	A	1997	-999	Pentaclethra	macroloba	Fabaceae	2016	2.9	0.00321	28.26	2016	703	0.39	3189.65
A1123	A1	A	1997	2016	Goethalsia	meiantha	Malvaceae	2013	0	0	0	2013	127	0.01	52.35
A1123	A1	A	1997	2016	Goethalsia	meiantha	Malvaceae	2014	0	0	0	2014	127	0.01	52.35
A1124	A1	A	1997	-999	Goethalsia	meiantha	Malvaceae	2013	11.74	0.00963	82.55	2013	516	0.21	1632.82
A1124	A1	A	1997	-999	Goethalsia	meiantha	Malvaceae	2014	11.44	0.00959	82.43	2014	528	0.22	1717.18
A1124	A1	A	1997	-999	Goethalsia	meiantha	Malvaceae	2015	4.17	0.00355	30.56	2015	540	0.23	1803.68
A1124	A1	A	1997	-999	Goethalsia	meiantha	Malvaceae	2016	7.75	0.00667	57.43	2016	544	0.23	1832.98
A1125	A1	P	1997	-999	Welfia	regia	Arecaceae	2013	0	0	0	2013	200	0.03	178.24
A1125	A1	P	1997	-999	Welfia	regia	Arecaceae	2014	0	0	0	2014	200	0.03	178.24
A1125	A1	P	1997	-999	Welfia	regia	Arecaceae	2015	0	0	0	2015	200	0.03	178.24
A1125	A1	P	1997	-999	Welfia	regia	Arecaceae	2016	0	0	0	2016	200	0.03	178.24
A1126	A1	A	1997	-999	Goethalsia	meiantha	Malvaceae	2013	4.89	0.00294	24.3	2013	380	0.11	825.64
A1126	A1	A	1997	-999	Goethalsia	meiantha	Malvaceae	2014	3.81	0.00232	19.18	2014	385	0.12	850.47
A1126	A1	A	1997	-999	Goethalsia	meiantha	Malvaceae	2015	3.13	0.00192	15.91	2015	389	0.12	870.6
A1126	A1	A	1997	-999	Goethalsia	meiantha	Malvaceae	2016	1.94	0.0012	9.92	2016	392	0.12	885.85
A1129	A1	A	1997	2016	Zygia	gigantifoliola	Fabaceae	2013	0	0	0	2013	102	0.01	27.37
A1129	A1	A	1997	2016	Zygia	gigantifoliola	Fabaceae	2014	0	0	0	2014	102	0.01	27.37
A1130	A1	A	1997	-999	Pentaclethra	macroloba	Fabaceae	2013	0	0	0	2013	404	0.13	948.19
A1130	A1	A	1997	-999	Pentaclethra	macroloba	Fabaceae	2014	3.81	0.00243	20.26	2014	404	0.13	948.19
A1130	A1	A	1997	-999	Pentaclethra	macroloba	Fabaceae	2015	3.13	0.00201	16.79	2015	408	0.13	969.45
A1130	A1	A	1997	-999	Pentaclethra	macroloba	Fabaceae	2016	7.75	0.00505	42.19	2016	411	0.13	985.54
A1131	A1	P	1997	-999	Welfia	regia	Arecaceae	2013	0	0	0	2013	193	0.03	162.75
A1131	A1	P	1997	-999	Welfia	regia	Arecaceae	2014	0	0	0	2014	193	0.03	162.75
A1131	A1	P	1997	-999	Welfia	regia	Arecaceae	2015	0	0	0	2015	193	0.03	162.75
A1131	A1	P	1997	-999	Welfia	regia	Arecaceae	2016	0	0	0	2016	193	0.03	162.75
A1132	A1	A	1997	-999	Dendropanax	arboreus	Araliaceae	2013	0	0	0	2013	124	0.01	48.86
A1132	A1	A	1997	-999	Dendropanax	arboreus	Araliaceae	2014	0	0	0	2014	124	0.01	48.86
A1132	A1	A	1997	-999	Dendropanax	arboreus	Araliaceae	2015	3.13	0.00062	3.64	2015	124	0.01	48.86
A1132	A1	A	1997	-999	Dendropanax	arboreus	Araliaceae	2016	4.84	0.00098	5.91	2016	127	0.01	52.35
A1133	A1	P	1997	2016	Welfia	regia	Arecaceae	2013	0	0	0	2013	200	0.03	178.24
A1133	A1	P	1997	2016	Welfia	regia	Arecaceae	2014	0	0	0	2014	200	0.03	178.24
A1135	A1	A	1997	-999	Inga	pezizifera	Fabaceae	2013	13.7	0.01194	103	2013	548	0.24	1862.52
A1135	A1	A	1997	-999	Inga	pezizifera	Fabaceae	2014	10.48	0.00934	80.76	2014	562	0.25	1967.78
A1135	A1	A	1997	-999	Inga	pezizifera	Fabaceae	2015	10.43	0.00947	81.96	2015	573	0.26	2052.52
A1135	A1	A	1997	-999	Inga	pezizifera	Fabaceae	2016	14.52	0.01347	116.82	2016	583	0.27	2131.12
A1136	A1	A	1997	-999	Ilex	skutchii	Aquifoliaceae	2013	1.96	0.00055	3.8	2013	177	0.02	130.06
A1136	A1	A	1997	-999	Ilex	skutchii	Aquifoliaceae	2014	0	0	0	2014	179	0.03	133.94
A1136	A1	A	1997	-999	Ilex	skutchii	Aquifoliaceae	2015	1.04	0.00029	2.05	2015	179	0.03	133.94
A1136	A1	A	1997	-999	Ilex	skutchii	Aquifoliaceae	2016	4.84	0.00139	9.71	2016	180	0.03	135.9
A1137	A1	P	1997	-999	Welfia	regia	Arecaceae	2013	0	0	0	2013	174	0.02	124.36
A1137	A1	P	1997	-999	Welfia	regia	Arecaceae	2014	0	0	0	2014	174	0.02	124.36
A1137	A1	P	1997	-999	Welfia	regia	Arecaceae	2015	0	0	0	2015	174	0.02	124.36
A1137	A1	P	1997	-999	Welfia	regia	Arecaceae	2016	0	0	0	2016	174	0.02	124.36
A1138	A1	P	1997	-999	Welfia	regia	Arecaceae	2013	0	0	0	2013	195	0.03	167.1
A1138	A1	P	1997	-999	Welfia	regia	Arecaceae	2014	0	0	0	2014	195	0.03	167.1
A1138	A1	P	1997	-999	Welfia	regia	Arecaceae	2015	0	0	0	2015	195	0.03	167.1
A1138	A1	P	1997	-999	Welfia	regia	Arecaceae	2016	0	0	0	2016	195	0.03	167.1
A1139	A1	A	1997	-999	Dussia	macroprophyllata	Fabaceae	2013	0	0	0	2013	203	0.03	185.1
A1139	A1	A	1997	-999	Dussia	macroprophyllata	Fabaceae	2014	1.91	0.00061	4.43	2014	203	0.03	185.1
A1139	A1	A	1997	-999	Dussia	macroprophyllata	Fabaceae	2015	0	0	0	2015	205	0.03	189.75
A1139	A1	A	1997	-999	Dussia	macroprophyllata	Fabaceae	2016	0	0	0	2016	205	0.03	189.75
A114	A1	A	1997	-999	Guatteria	aeruginosa	Annonaceae	2013	0.97	0.00068	5.72	2013	446	0.16	1183.17
A114	A1	A	1997	-999	Guatteria	aeruginosa	Annonaceae	2014	1.91	0.00134	11.34	2014	447	0.16	1189.08
A114	A1	A	1997	-999	Guatteria	aeruginosa	Annonaceae	2015	2.12	0.0015	12.62	2015	449	0.16	1200.95
A114	A1	A	1997	-999	Guatteria	aeruginosa	Annonaceae	2016	4.72	0.00336	28.37	2016	451	0.16	1212.88
A1140	A1	A	1997	-999	Rhodostemonodaphne	kunthiana	Lauraceae	2013	0.98	0.00044	3.51	2013	289	0.07	438.41
A1140	A1	A	1997	-999	Rhodostemonodaphne	kunthiana	Lauraceae	2014	0.95	0.00043	3.43	2014	290	0.07	442
A1140	A1	A	1997	-999	Rhodostemonodaphne	kunthiana	Lauraceae	2015	1.04	0.00048	3.77	2015	291	0.07	445.6
A1140	A1	A	1997	-999	Rhodostemonodaphne	kunthiana	Lauraceae	2016	2.9	0.00134	10.6	2016	292	0.07	449.22
A1141	A1	A	1997	-999	Guarea	rhopalocarpa	Meliaceae	2013	0	0	0	2013	110	0.01	34.35
A1141	A1	A	1997	-999	Guarea	rhopalocarpa	Meliaceae	2014	0	0	0	2014	110	0.01	34.35
A1141	A1	A	1997	-999	Guarea	rhopalocarpa	Meliaceae	2015	0	0	0	2015	110	0.01	34.35
A1141	A1	A	1997	-999	Guarea	rhopalocarpa	Meliaceae	2016	0	0	0	2016	110	0.01	34.35
A1142	A1	A	1997	-999	Cupania	pseudostipularis	Sapindaceae	2013	0.98	0.00036	2.73	2013	235	0.04	266.57
A1142	A1	A	1997	-999	Cupania	pseudostipularis	Sapindaceae	2014	0.95	0.00035	2.67	2014	236	0.04	269.36
A1142	A1	A	1997	-999	Cupania	pseudostipularis	Sapindaceae	2015	0	0	0	2015	237	0.04	272.16
A1142	A1	A	1997	-999	Cupania	pseudostipularis	Sapindaceae	2016	1.94	0.00072	5.47	2016	237	0.04	272.16
A1143	A1	A	1997	-999	Coussarea	psychotrioides	Rubiaceae	2013	0.98	0.00036	2.72	2013	234	0.04	263.79
A1143	A1	A	1997	-999	Coussarea	psychotrioides	Rubiaceae	2014	1.91	0.00071	5.33	2014	235	0.04	266.57
A1143	A1	A	1997	-999	Coussarea	psychotrioides	Rubiaceae	2015	0	0	0	2015	237	0.04	272.16
A1143	A1	A	1997	-999	Coussarea	psychotrioides	Rubiaceae	2016	0	0	0	2016	237	0.04	272.16
A1147	A1	A	1997	-999	Ocotea	hartshorniana	Lauraceae	2013	8.81	0.0091	79.58	2013	653	0.33	2722.69
A1147	A1	A	1997	-999	Ocotea	hartshorniana	Lauraceae	2014	8.58	0.00898	78.64	2014	662	0.34	2804.01
A1147	A1	A	1997	-999	Ocotea	hartshorniana	Lauraceae	2015	8.34	0.00885	77.54	2015	671	0.35	2886.53
A1147	A1	A	1997	-999	Ocotea	hartshorniana	Lauraceae	2016	5.81	0.00622	54.59	2016	679	0.36	2960.89
A1148	A1	A	1997	-999	Ocotea	hartshorniana	Lauraceae	2013	6.85	0.00224	16.37	2013	205	0.03	189.75
A1148	A1	A	1997	-999	Ocotea	hartshorniana	Lauraceae	2014	6.67	0.00226	16.64	2014	212	0.04	206.48
A1148	A1	A	1997	-999	Ocotea	hartshorniana	Lauraceae	2015	3.13	0.00108	8.03	2015	219	0.04	223.94
A1148	A1	A	1997	-999	Ocotea	hartshorniana	Lauraceae	2016	1.94	0.00068	5.04	2016	222	0.04	231.64
A1149	A1	A	1997	-999	Jacaranda	copaia	Bignoniaceae	2013	1.96	0.00087	6.84	2013	282	0.06	413.7
A1149	A1	A	1997	-999	Jacaranda	copaia	Bignoniaceae	2014	1.91	0.00085	6.71	2014	284	0.06	420.69
A1149	A1	A	1997	-999	Jacaranda	copaia	Bignoniaceae	2015	3.13	0.00141	11.14	2015	286	0.06	427.73
A1149	A1	A	1997	-999	Jacaranda	copaia	Bignoniaceae	2016	0.97	0.00044	3.48	2016	289	0.07	438.41
A1151	A1	A	1997	-999	Brosimum	lactescens	Moraceae	2013	2.94	0.00064	3.98	2013	137	0.01	64.93
A1151	A1	A	1997	-999	Brosimum	lactescens	Moraceae	2014	2.86	0.00064	4	2014	140	0.02	69
A1151	A1	A	1997	-999	Brosimum	lactescens	Moraceae	2015	0	0	0	2015	143	0.02	73.19
A1151	A1	A	1997	-999	Brosimum	lactescens	Moraceae	2016	6.78	0.00156	9.98	2016	143	0.02	73.19
A1152	A1	A	1997	-999	Cassipourea	elliptica	Rhizophoraceae	2013	0	0	0	2013	121	0.01	45.51
A1152	A1	A	1997	-999	Cassipourea	elliptica	Rhizophoraceae	2014	0	0	0	2014	121	0.01	45.51
A1152	A1	A	1997	-999	Cassipourea	elliptica	Rhizophoraceae	2015	1.04	0.0002	1.15	2015	121	0.01	45.51
A1152	A1	A	1997	-999	Cassipourea	elliptica	Rhizophoraceae	2016	1.94	0.00037	2.18	2016	122	0.01	46.61
A1153	A1	A	1997	-999	Preslianthus	pittieri	Capparaceae	2013	0	0	0	2013	163	0.02	104.57
A1153	A1	A	1997	-999	Preslianthus	pittieri	Capparaceae	2014	0	0	0	2014	163	0.02	104.57
A1153	A1	A	1997	-999	Preslianthus	pittieri	Capparaceae	2015	0	0	0	2015	163	0.02	104.57
A1153	A1	A	1997	-999	Preslianthus	pittieri	Capparaceae	2016	0.97	0.00025	1.67	2016	163	0.02	104.57
A1155	A1	A	1997	-999	Pterocarpus	sp. A	Fabaceae	2013	0	0	0	2013	140	0.02	69
A1155	A1	A	1997	-999	Pterocarpus	sp. A	Fabaceae	2014	0.95	0.00021	1.32	2014	140	0.02	69
A1155	A1	A	1997	-999	Pterocarpus	sp. A	Fabaceae	2015	0	0	0	2015	141	0.02	70.38
A1155	A1	A	1997	-999	Pterocarpus	sp. A	Fabaceae	2016	0	0	0	2016	141	0.02	70.38
A1156	A1	P	1997	-999	Welfia	regia	Arecaceae	2013	0	0	0	2013	148	0.02	80.48
A1156	A1	P	1997	-999	Welfia	regia	Arecaceae	2014	0	0	0	2014	148	0.02	80.48
A1156	A1	P	1997	-999	Welfia	regia	Arecaceae	2015	0	0	0	2015	148	0.02	80.48
A1156	A1	P	1997	-999	Welfia	regia	Arecaceae	2016	0	0	0	2016	148	0.02	80.48
A1160	A1	A	1997	-999	Guarea	gentryi	Meliaceae	2013	3.91	0.00518	46.06	2013	840	0.55	4658.69
A1160	A1	A	1997	-999	Guarea	gentryi	Meliaceae	2014	0.95	0.00126	11.25	2014	844	0.56	4705.75
A1160	A1	A	1997	-999	Guarea	gentryi	Meliaceae	2015	2.09	0.00277	24.66	2015	845	0.56	4717.55
A1160	A1	A	1997	-999	Guarea	gentryi	Meliaceae	2016	7.75	0.01035	92.17	2016	847	0.56	4741.2
A1161	A1	A	1997	-999	Dussia	macroprophyllata	Fabaceae	2013	0.98	0.00095	8.28	2013	618	0.3	2417.84
A1161	A1	A	1997	-999	Dussia	macroprophyllata	Fabaceae	2014	0	0	0	2014	619	0.3	2426.3
A1161	A1	A	1997	-999	Dussia	macroprophyllata	Fabaceae	2015	2.09	0.00203	17.69	2015	619	0.3	2426.3
A1161	A1	A	1997	-999	Dussia	macroprophyllata	Fabaceae	2016	0	0	0	2016	621	0.3	2443.26
A1162	A1	A	1997	-999	Rauvolfia	purpurascens	Apocynaceae	2013	2.94	0.00068	4.41	2013	147	0.02	78.99
A1162	A1	A	1997	-999	Rauvolfia	purpurascens	Apocynaceae	2014	2.86	0.00068	4.42	2014	150	0.02	83.5
A1162	A1	A	1997	-999	Rauvolfia	purpurascens	Apocynaceae	2015	1.04	0.00025	1.64	2015	153	0.02	88.14
A1162	A1	A	1997	-999	Rauvolfia	purpurascens	Apocynaceae	2016	0.97	0.00023	1.54	2016	154	0.02	89.72
A1164	A1	A	1997	-999	Guarea	gentryi	Meliaceae	2013	0	0	0	2013	164	0.02	106.3
A1164	A1	A	1997	-999	Guarea	gentryi	Meliaceae	2014	0.95	0.00025	1.66	2014	164	0.02	106.3
A1164	A1	A	1997	-999	Guarea	gentryi	Meliaceae	2015	0	0	0	2015	165	0.02	108.04
A1164	A1	A	1997	-999	Guarea	gentryi	Meliaceae	2016	0	0	0	2016	165	0.02	108.04
A1165	A1	A	1997	-999	Pouteria	torta	Sapotaceae	2013	2.94	0.00132	10.36	2013	284	0.06	420.69
A1165	A1	A	1997	-999	Pouteria	torta	Sapotaceae	2014	0	0	0	2014	287	0.06	431.28
A1165	A1	A	1997	-999	Pouteria	torta	Sapotaceae	2015	1.04	0.00047	3.71	2015	287	0.06	431.28
A1165	A1	A	1997	-999	Pouteria	torta	Sapotaceae	2016	3.87	0.00176	13.93	2016	288	0.07	434.84
A117	A1	A	1997	-999	Coussarea	hondensis	Rubiaceae	2013	0.97	0.00018	1.05	2013	120	0.01	44.42
A117	A1	A	1997	-999	Coussarea	hondensis	Rubiaceae	2014	0	0	0	2014	121	0.01	45.51
A117	A1	A	1997	-999	Coussarea	hondensis	Rubiaceae	2015	1.06	0.0002	1.17	2015	121	0.01	45.51
A117	A1	A	1997	-999	Coussarea	hondensis	Rubiaceae	2016	1.89	0.00036	2.12	2016	122	0.01	46.61
A1171	A1	A	1997	-999	Hymenolobium	mesoamericanum	Fabaceae	2013	8.81	0.01	88.05	2013	718	0.4	3336.95
A1171	A1	A	1997	-999	Hymenolobium	mesoamericanum	Fabaceae	2014	6.67	0.00765	67.48	2014	727	0.42	3426.93
A1171	A1	A	1997	-999	Hymenolobium	mesoamericanum	Fabaceae	2015	6.26	0.00724	63.9	2015	734	0.42	3497.74
A1171	A1	A	1997	-999	Hymenolobium	mesoamericanum	Fabaceae	2016	6.78	0.00792	69.86	2016	740	0.43	3559.02
A1175	A1	A	1998	-999	Inga	pezizifera	Fabaceae	2013	0.98	0.00019	1.07	2013	120	0.01	44.42
A1175	A1	A	1998	-999	Inga	pezizifera	Fabaceae	2014	0.96	0.00018	1.05	2014	121	0.01	45.51
A1175	A1	A	1998	-999	Inga	pezizifera	Fabaceae	2015	2.12	0.00041	2.38	2015	122	0.01	46.61
A1175	A1	A	1998	-999	Inga	pezizifera	Fabaceae	2016	4.72	0.00094	5.55	2016	124	0.01	48.86
A1176	A1	P	1998	-999	Socratea	exorrhiza	Arecaceae	2013	0	0	0	2013	120	0.01	44.42
A1176	A1	P	1998	-999	Socratea	exorrhiza	Arecaceae	2014	0	0	0	2014	120	0.01	44.42
A1176	A1	P	1998	-999	Socratea	exorrhiza	Arecaceae	2015	0	0	0	2015	120	0.01	44.42
A1176	A1	P	1998	-999	Socratea	exorrhiza	Arecaceae	2016	0	0	0	2016	120	0.01	44.42
A1177	A1	P	1998	2016	Socratea	exorrhiza	Arecaceae	2013	0	0	0	2013	116	0.01	40.22
A1177	A1	P	1998	2016	Socratea	exorrhiza	Arecaceae	2014	0	0	0	2014	116	0.01	40.22
A1179	A1	A	1999	-999	Inga	thibaudiana	Fabaceae	2013	7.83	0.00325	25.14	2013	260	0.05	340.76
A1179	A1	A	1999	-999	Inga	thibaudiana	Fabaceae	2014	3.81	0.00162	12.58	2014	268	0.06	366.45
A1179	A1	A	1999	-999	Inga	thibaudiana	Fabaceae	2015	1.04	0.00045	3.48	2015	272	0.06	379.66
A1179	A1	A	1999	-999	Inga	thibaudiana	Fabaceae	2016	3.87	0.00167	13.07	2016	273	0.06	382.99
A118	A1	A	1997	-999	Virola	koschnyi	Myristicaceae	2013	5.81	0.0048	41.18	2013	523	0.21	1681.77
A118	A1	A	1997	-999	Virola	koschnyi	Myristicaceae	2014	4.78	0.00399	34.26	2014	529	0.22	1724.31
A118	A1	A	1997	-999	Virola	koschnyi	Myristicaceae	2015	0	0	0	2015	534	0.22	1760.16
A118	A1	A	1997	-999	Virola	koschnyi	Myristicaceae	2016	0.94	0.00079	6.81	2016	534	0.22	1760.16
A1180	A1	A	1999	-999	Pentaclethra	macroloba	Fabaceae	2013	2.94	0.00104	7.71	2013	223	0.04	234.24
A1180	A1	A	1999	-999	Pentaclethra	macroloba	Fabaceae	2014	4.77	0.00171	12.8	2014	226	0.04	242.12
A1180	A1	A	1999	-999	Pentaclethra	macroloba	Fabaceae	2015	3.13	0.00114	8.59	2015	231	0.04	255.55
A1180	A1	A	1999	-999	Pentaclethra	macroloba	Fabaceae	2016	4.84	0.0018	13.58	2016	234	0.04	263.79
A1182	A1	A	2000	-999	Pentaclethra	macroloba	Fabaceae	2013	12.59	0.00525	40.71	2013	259	0.05	337.61
A1182	A1	A	2000	-999	Pentaclethra	macroloba	Fabaceae	2014	13.38	0.00586	45.94	2014	272	0.06	379.66
A1182	A1	A	2000	-999	Pentaclethra	macroloba	Fabaceae	2015	12.7	0.00582	46.04	2015	286	0.06	427.73
A1182	A1	A	2000	-999	Pentaclethra	macroloba	Fabaceae	2016	17.92	0.00866	69.09	2016	298	0.07	471.25
A1183	A1	A	2000	-999	Goethalsia	meiantha	Malvaceae	2013	20.33	0.01378	115.7	2013	421	0.14	1040.16
A1183	A1	A	2000	-999	Goethalsia	meiantha	Malvaceae	2014	41.09	0.02991	253.28	2014	442	0.15	1159.67
A1183	A1	A	2000	-999	Goethalsia	meiantha	Malvaceae	2015	15.87	0.01228	104.64	2015	485	0.18	1424.74
A1183	A1	A	2000	-999	Goethalsia	meiantha	Malvaceae	2016	18.86	0.01511	129.26	2016	500	0.2	1523.65
A1184	A1	A	2000	-999	Virola	sebifera	Myristicaceae	2013	5.87	0.0014	9.13	2013	149	0.02	81.98
A1184	A1	A	2000	-999	Virola	sebifera	Myristicaceae	2014	2.86	0.0007	4.63	2014	155	0.02	91.31
A1184	A1	A	2000	-999	Virola	sebifera	Myristicaceae	2015	5.21	0.00131	8.76	2015	158	0.02	96.17
A1184	A1	A	2000	-999	Virola	sebifera	Myristicaceae	2016	6.78	0.00177	11.99	2016	163	0.02	104.57
A1185	A1	A	2002	-999	Naucleopsis	naga	Moraceae	2013	0	0	0	2013	108	0.01	32.52
A1185	A1	A	2002	-999	Naucleopsis	naga	Moraceae	2014	0	0	0	2014	108	0.01	32.52
A1185	A1	A	2002	-999	Naucleopsis	naga	Moraceae	2015	0	0	0	2015	108	0.01	32.52
A1185	A1	A	2002	-999	Naucleopsis	naga	Moraceae	2016	0	0	0	2016	108	0.01	32.52
A1186	A1	A	2002	-999	Goethalsia	meiantha	Malvaceae	2013	5.87	0.00244	18.94	2013	262	0.05	347.09
A1186	A1	A	2002	-999	Goethalsia	meiantha	Malvaceae	2014	7.62	0.00326	25.39	2014	268	0.06	366.45
A1186	A1	A	2002	-999	Goethalsia	meiantha	Malvaceae	2015	4.17	0.00182	14.26	2015	276	0.06	393.1
A1186	A1	A	2002	-999	Goethalsia	meiantha	Malvaceae	2016	9.68	0.00433	34.11	2016	280	0.06	406.77
A1187	A1	A	2002	-999	Preslianthus	pittieri	Capparaceae	2013	0.98	0.00017	0.92	2013	110	0.01	34.35
A1187	A1	A	2002	-999	Preslianthus	pittieri	Capparaceae	2014	0	0	0	2014	111	0.01	35.29
A1187	A1	A	2002	-999	Preslianthus	pittieri	Capparaceae	2015	0	0	0	2015	111	0.01	35.29
A1187	A1	A	2002	-999	Preslianthus	pittieri	Capparaceae	2016	1.94	0.00034	1.86	2016	111	0.01	35.29
A1188	A1	A	2004	-999	Quararibea	bracteolosa	Malvaceae	2013	3.91	0.00077	4.58	2013	124	0.01	48.86
A1188	A1	A	2004	-999	Quararibea	bracteolosa	Malvaceae	2014	2.86	0.00058	3.49	2014	128	0.01	53.54
A1188	A1	A	2004	-999	Quararibea	bracteolosa	Malvaceae	2015	3.13	0.00065	3.96	2015	131	0.01	57.2
A1188	A1	A	2004	-999	Quararibea	bracteolosa	Malvaceae	2016	3.87	0.00083	5.1	2016	134	0.01	61
A1189	A1	A	2003	-999	Anaxagorea	crassipetala	Annonaceae	2013	0	0	0	2013	112	0.01	36.25
A1189	A1	A	2003	-999	Anaxagorea	crassipetala	Annonaceae	2014	1.91	0.00034	1.86	2014	112	0.01	36.25
A1189	A1	A	2003	-999	Anaxagorea	crassipetala	Annonaceae	2015	0	0	0	2015	114	0.01	38.2
A1189	A1	A	2003	-999	Anaxagorea	crassipetala	Annonaceae	2016	0	0	0	2016	114	0.01	38.2
A119	A1	P	1997	2017	Welfia	regia	Arecaceae	2013	0	0	0	2013	217	0.04	218.88
A119	A1	P	1997	2017	Welfia	regia	Arecaceae	2014	0	0	0	2014	217	0.04	218.88
A119	A1	P	1997	2017	Welfia	regia	Arecaceae	2015	0	0	0	2015	217	0.04	218.88
A1190	A1	A	2004	-999	Heisteria	concinna	Erythropalaceae	2013	0.97	0.00018	1	2013	116	0.01	40.22
A1190	A1	A	2004	-999	Heisteria	concinna	Erythropalaceae	2014	0.96	0.00018	1	2014	117	0.01	41.25
A1190	A1	A	2004	-999	Heisteria	concinna	Erythropalaceae	2015	0	0	0	2015	118	0.01	42.29
A1190	A1	A	2004	-999	Heisteria	concinna	Erythropalaceae	2016	0	0	0	2016	118	0.01	42.29
A1191	A1	A	2004	-999	Pentaclethra	macroloba	Fabaceae	2013	6.85	0.00214	15.36	2013	195	0.03	167.1
A1191	A1	A	2004	-999	Pentaclethra	macroloba	Fabaceae	2014	8.58	0.00278	20.25	2014	202	0.03	182.8
A1191	A1	A	2004	-999	Pentaclethra	macroloba	Fabaceae	2015	8.34	0.00282	20.75	2015	211	0.03	204.04
A1191	A1	A	2004	-999	Pentaclethra	macroloba	Fabaceae	2016	10.65	0.00376	27.98	2016	219	0.04	223.94
A12	A1	A	1997	-999	Sloanea	medusula	Elaeocarpaceae	2013	0	0	0	2013	350	0.1	684.44
A12	A1	A	1997	-999	Sloanea	medusula	Elaeocarpaceae	2014	0.96	0.00053	4.29	2014	350	0.1	684.44
A12	A1	A	1997	-999	Sloanea	medusula	Elaeocarpaceae	2015	0	0	0	2015	351	0.1	688.93
A12	A1	A	1997	-999	Sloanea	medusula	Elaeocarpaceae	2016	0	0	0	2016	351	0.1	688.93
A120	A1	A	1997	-999	Preslianthus	pittieri	Capparaceae	2013	0.97	0.00019	1.08	2013	122	0.01	46.61
A120	A1	A	1997	-999	Preslianthus	pittieri	Capparaceae	2014	0	0	0	2014	123	0.01	47.73
A120	A1	A	1997	-999	Preslianthus	pittieri	Capparaceae	2015	0	0	0	2015	123	0.01	47.73
A120	A1	A	1997	-999	Preslianthus	pittieri	Capparaceae	2016	0	0	0	2016	123	0.01	47.73
A121	A1	A	1997	-999	Preslianthus	pittieri	Capparaceae	2013	0	0	0	2013	114	0.01	38.2
A121	A1	A	1997	-999	Preslianthus	pittieri	Capparaceae	2014	0	0	0	2014	114	0.01	38.2
A121	A1	A	1997	-999	Preslianthus	pittieri	Capparaceae	2015	0	0	0	2015	114	0.01	38.2
A121	A1	A	1997	-999	Preslianthus	pittieri	Capparaceae	2016	0	0	0	2016	114	0.01	38.2
A1212	A1	A	2005	-999	Guatteria	amplifolia	Annonaceae	2013	2.94	0.0006	3.59	2013	128	0.01	53.54
A1212	A1	A	2005	-999	Guatteria	amplifolia	Annonaceae	2014	1.91	0.0004	2.4	2014	131	0.01	57.2
A1212	A1	A	2005	-999	Guatteria	amplifolia	Annonaceae	2015	3.13	0.00066	4.05	2015	133	0.01	59.72
A1212	A1	A	2005	-999	Guatteria	amplifolia	Annonaceae	2016	9.68	0.00214	13.47	2016	136	0.01	63.61
A1213	A1	A	2006	-999	Apeiba	membranacea	Malvaceae	2013	10.65	0.00227	13.95	2013	130	0.01	55.97
A1213	A1	A	2006	-999	Apeiba	membranacea	Malvaceae	2014	5.73	0.0013	8.23	2014	141	0.02	70.38
A1213	A1	A	2006	-999	Apeiba	membranacea	Malvaceae	2015	1.06	0.00025	1.57	2015	147	0.02	78.99
A1213	A1	A	2006	-999	Apeiba	membranacea	Malvaceae	2016	12.26	0.00298	19.51	2016	148	0.02	80.48
A1214	A1	A	2006	-999	Rinorea	deflexiflora	Violaceae	2013	0	0	0	2013	120	0.01	44.42
A1214	A1	A	2006	-999	Rinorea	deflexiflora	Violaceae	2014	0	0	0	2014	120	0.01	44.42
A1214	A1	A	2006	-999	Rinorea	deflexiflora	Violaceae	2015	0	0	0	2015	120	0.01	44.42
A1214	A1	A	2006	-999	Rinorea	deflexiflora	Violaceae	2016	0	0	0	2016	120	0.01	44.42
A1215	A1	A	2006	-999	Swartzia	ochnacea	Fabaceae	2013	0	0	0	2013	104	0.01	29.02
A1215	A1	A	2006	-999	Swartzia	ochnacea	Fabaceae	2014	0.95	0.00016	0.81	2014	104	0.01	29.02
A1215	A1	A	2006	-999	Swartzia	ochnacea	Fabaceae	2015	2.09	0.00035	1.82	2015	105	0.01	29.88
A1215	A1	A	2006	-999	Swartzia	ochnacea	Fabaceae	2016	2.9	0.0005	2.64	2016	107	0.01	31.62
A1216	A1	A	2006	-999	Pourouma	bicolor	Urticaceae	2013	5.87	0.00167	11.65	2013	178	0.02	132
A1216	A1	A	2006	-999	Pourouma	bicolor	Urticaceae	2014	1.91	0.00055	3.89	2014	184	0.03	143.9
A1216	A1	A	2006	-999	Pourouma	bicolor	Urticaceae	2015	7.3	0.00217	15.4	2015	186	0.03	147.98
A1216	A1	A	2006	-999	Pourouma	bicolor	Urticaceae	2016	8.71	0.0027	19.41	2016	193	0.03	162.75
A1217	A1	A	2007	-999	Dendropanax	arboreus	Araliaceae	2013	7.75	0.00186	12.15	2013	149	0.02	81.98
A1217	A1	A	2007	-999	Dendropanax	arboreus	Araliaceae	2014	7.64	0.00193	12.9	2014	157	0.02	94.54
A1217	A1	A	2007	-999	Dendropanax	arboreus	Araliaceae	2015	7.41	0.00196	13.32	2015	165	0.02	108.04
A1217	A1	A	2007	-999	Dendropanax	arboreus	Araliaceae	2016	1.89	0.00051	3.52	2016	172	0.02	120.63
A1218	A1	A	2007	-999	Pentaclethra	macroloba	Fabaceae	2013	3.87	0.00086	5.45	2013	140	0.02	69
A1218	A1	A	2007	-999	Pentaclethra	macroloba	Fabaceae	2014	5.73	0.00132	8.49	2014	144	0.02	74.62
A1218	A1	A	2007	-999	Pentaclethra	macroloba	Fabaceae	2015	5.29	0.00127	8.26	2015	150	0.02	83.5
A1218	A1	A	2007	-999	Pentaclethra	macroloba	Fabaceae	2016	5.66	0.0014	9.3	2016	155	0.02	91.31
A1220	A1	A	2007	-999	Guarea	bullata	Meliaceae	2013	1.94	0.00039	2.32	2013	127	0.01	52.35
A1220	A1	A	2007	-999	Guarea	bullata	Meliaceae	2014	3.82	0.00079	4.75	2014	129	0.01	54.75
A1220	A1	A	2007	-999	Guarea	bullata	Meliaceae	2015	1.06	0.00022	1.35	2015	133	0.01	59.72
A1220	A1	A	2007	-999	Guarea	bullata	Meliaceae	2016	9.43	0.00206	12.84	2016	134	0.01	61
A1221	A1	A	2007	-999	Apeiba	membranacea	Malvaceae	2013	0	0	0	2013	121	0.01	45.51
A1221	A1	A	2007	-999	Apeiba	membranacea	Malvaceae	2014	0	0	0	2014	121	0.01	45.51
A1221	A1	A	2007	-999	Apeiba	membranacea	Malvaceae	2015	0	0	0	2015	121	0.01	45.51
A1221	A1	A	2007	-999	Apeiba	membranacea	Malvaceae	2016	4.84	0.00094	5.48	2016	121	0.01	45.51
A1222	A1	A	2008	-999	Pouteria	torta	Sapotaceae	2013	1.94	0.00034	1.89	2013	112	0.01	36.25
A1222	A1	A	2008	-999	Pouteria	torta	Sapotaceae	2014	1.91	0.00035	1.92	2014	114	0.01	38.2
A1222	A1	A	2008	-999	Pouteria	torta	Sapotaceae	2015	1.06	0.00019	1.09	2015	116	0.01	40.22
A1222	A1	A	2008	-999	Pouteria	torta	Sapotaceae	2016	2.83	0.00053	2.99	2016	117	0.01	41.25
A1223	A1	A	2008	-999	Rinorea	deflexiflora	Violaceae	2013	0.97	0.00016	0.81	2013	103	0.01	28.19
A1223	A1	A	2008	-999	Rinorea	deflexiflora	Violaceae	2014	0	0	0	2014	104	0.01	29.02
A1223	A1	A	2008	-999	Rinorea	deflexiflora	Violaceae	2015	0	0	0	2015	104	0.01	29.02
A1223	A1	A	2008	-999	Rinorea	deflexiflora	Violaceae	2016	3.77	0.00063	3.3	2016	104	0.01	29.02
A1224	A1	A	2008	-999	Protium	panamense	Burseraceae	2013	8.71	0.00209	13.61	2013	148	0.02	80.48
A1224	A1	A	2008	-999	Protium	panamense	Burseraceae	2014	8.6	0.00218	14.58	2014	157	0.02	94.54
A1224	A1	A	2008	-999	Protium	panamense	Burseraceae	2015	8.46	0.00226	15.41	2015	166	0.02	109.79
A1224	A1	A	2008	-999	Protium	panamense	Burseraceae	2016	23.58	0.00691	48.69	2016	174	0.02	124.36
A1225	A1	A	2008	-999	Guatteria	amplifolia	Annonaceae	2013	0	0	0	2013	104	0.01	29.02
A1225	A1	A	2008	-999	Guatteria	amplifolia	Annonaceae	2014	0.95	0.00016	0.81	2014	104	0.01	29.02
A1225	A1	A	2008	-999	Guatteria	amplifolia	Annonaceae	2015	0	0	0	2015	105	0.01	29.88
A1225	A1	A	2008	-999	Guatteria	amplifolia	Annonaceae	2016	1.94	0.00032	1.69	2016	105	0.01	29.88
A1226	A1	A	2008	-999	Anaxagorea	crassipetala	Annonaceae	2013	0	0	0	2013	108	0.01	32.52
A1226	A1	A	2008	-999	Anaxagorea	crassipetala	Annonaceae	2014	0	0	0	2014	108	0.01	32.52
A1226	A1	A	2008	-999	Anaxagorea	crassipetala	Annonaceae	2015	1.04	0.00018	0.95	2015	108	0.01	32.52
A1226	A1	A	2008	-999	Anaxagorea	crassipetala	Annonaceae	2016	0	0	0	2016	109	0.01	33.43
A1227	A1	A	2012	-999	Goethalsia	meiantha	Malvaceae	2013	20.33	0.00471	30.25	2013	137	0.01	64.93
A1227	A1	A	2012	-999	Goethalsia	meiantha	Malvaceae	2014	13.38	0.00347	23.37	2014	158	0.02	96.17
A1227	A1	A	2012	-999	Goethalsia	meiantha	Malvaceae	2015	14.81	0.00416	28.94	2015	172	0.02	120.63
A1227	A1	A	2012	-999	Goethalsia	meiantha	Malvaceae	2016	21.69	0.00673	48.32	2016	186	0.03	147.98
A123	A1	P	1997	2017	Welfia	regia	Arecaceae	2013	0	0	0	2013	181	0.03	137.88
A123	A1	P	1997	2017	Welfia	regia	Arecaceae	2014	0	0	0	2014	181	0.03	137.88
A123	A1	P	1997	2017	Welfia	regia	Arecaceae	2015	0	0	0	2015	181	0.03	137.88
A1232	A1	A	2009	-999	Tetrorchidium	euryphyllum	Euphorbiaceae	2013	10.65	0.00329	23.57	2013	191	0.03	158.45
A1232	A1	A	2009	-999	Tetrorchidium	euryphyllum	Euphorbiaceae	2014	0	0	0	2014	202	0.03	182.8
A1232	A1	A	2009	-999	Tetrorchidium	euryphyllum	Euphorbiaceae	2015	0	0	0	2015	202	0.03	182.8
A1232	A1	A	2009	-999	Tetrorchidium	euryphyllum	Euphorbiaceae	2016	1.89	0.0006	4.36	2016	202	0.03	182.8
A1233	A1	A	2009	-999	Naucleopsis	naga	Moraceae	2013	0.97	0.00016	0.82	2013	104	0.01	29.02
A1233	A1	A	2009	-999	Naucleopsis	naga	Moraceae	2014	0.96	0.00016	0.83	2014	105	0.01	29.88
A1233	A1	A	2009	-999	Naucleopsis	naga	Moraceae	2015	0	0	0	2015	106	0.01	30.74
A1233	A1	A	2009	-999	Naucleopsis	naga	Moraceae	2016	0	0	0	2016	106	0.01	30.74
A1234	A1	A	2009	-999	Anaxagorea	crassipetala	Annonaceae	2013	1.96	0.00034	1.8	2013	108	0.01	32.52
A1234	A1	A	2009	-999	Anaxagorea	crassipetala	Annonaceae	2014	2.86	0.0005	2.73	2014	110	0.01	34.35
A1234	A1	A	2009	-999	Anaxagorea	crassipetala	Annonaceae	2015	1.04	0.00019	1.03	2015	113	0.01	37.22
A1234	A1	A	2009	-999	Anaxagorea	crassipetala	Annonaceae	2016	1.94	0.00035	1.95	2016	114	0.01	38.2
A1239	A1	A	2014	-999	Goethalsia	meiantha	Malvaceae	2014	16.29	0.00278	14.83	2014	100	0.01	25.77
A1239	A1	A	2014	-999	Goethalsia	meiantha	Malvaceae	2015	11.64	0.00224	13.01	2015	117	0.01	41.25
A1239	A1	A	2014	-999	Goethalsia	meiantha	Malvaceae	2016	28.29	0.00636	40.21	2016	128	0.01	53.54
A124	A1	A	1997	2017	Protium	panamense	Burseraceae	2013	2.9	0.00073	4.88	2013	159	0.02	97.82
A124	A1	A	1997	2017	Protium	panamense	Burseraceae	2014	0.96	0.00024	1.63	2014	162	0.02	102.86
A124	A1	A	1997	2017	Protium	panamense	Burseraceae	2015	0	0	0	2015	163	0.02	104.57
A1242	A1	P	2010	-999	Welfia	regia	Arecaceae	2013	0	0	0	2013	187	0.03	150.05
A1242	A1	P	2010	-999	Welfia	regia	Arecaceae	2014	0.96	0.00028	1.99	2014	187	0.03	150.05
A1242	A1	P	2010	-999	Welfia	regia	Arecaceae	2015	0	0	0	2015	188	0.03	152.13
A1242	A1	P	2010	-999	Welfia	regia	Arecaceae	2016	0	0	0	2016	188	0.03	152.13
A1243	A1	A	2010	-999	Dendropanax	arboreus	Araliaceae	2013	6.78	0.00146	9.08	2013	134	0.01	61
A1243	A1	A	2010	-999	Dendropanax	arboreus	Araliaceae	2014	5.73	0.0013	8.23	2014	141	0.02	70.38
A1243	A1	A	2010	-999	Dendropanax	arboreus	Araliaceae	2015	6.35	0.0015	9.68	2015	147	0.02	78.99
A1243	A1	A	2010	-999	Dendropanax	arboreus	Araliaceae	2016	1.89	0.00046	2.99	2016	153	0.02	88.14
A1244	A1	A	2010	-999	Perebea	hispidula	Moraceae	2013	0	0	0	2013	106	0.01	30.74
A1244	A1	A	2010	-999	Perebea	hispidula	Moraceae	2014	0	0	0	2014	106	0.01	30.74
A1244	A1	A	2010	-999	Perebea	hispidula	Moraceae	2015	0	0	0	2015	106	0.01	30.74
A1244	A1	A	2010	-999	Perebea	hispidula	Moraceae	2016	0.94	0.00016	0.83	2016	106	0.01	30.74
A1247	A1	A	2010	-999	Inga	leiocalycina	Fabaceae	2013	0.98	0.00017	0.93	2013	111	0.01	35.29
A1247	A1	A	2010	-999	Inga	leiocalycina	Fabaceae	2014	0	0	0	2014	112	0.01	36.25
A1247	A1	A	2010	-999	Inga	leiocalycina	Fabaceae	2015	0	0	0	2015	112	0.01	36.25
A1247	A1	A	2010	-999	Inga	leiocalycina	Fabaceae	2016	0	0	0	2016	112	0.01	36.25
A1248	A1	A	2011	-999	Guarea	gentryi	Meliaceae	2013	0.97	0.00016	0.87	2013	107	0.01	31.62
A1248	A1	A	2011	-999	Guarea	gentryi	Meliaceae	2014	1.91	0.00033	1.75	2014	108	0.01	32.52
A1248	A1	A	2011	-999	Guarea	gentryi	Meliaceae	2015	0	0	0	2015	110	0.01	34.35
A1248	A1	A	2011	-999	Guarea	gentryi	Meliaceae	2016	6.6	0.00118	6.5	2016	110	0.01	34.35
A1249	A1	A	2011	-999	Chrysophyllum	venezuelanense	Sapotaceae	2013	0	0	0	2013	103	0.01	28.19
A1249	A1	A	2011	-999	Chrysophyllum	venezuelanense	Sapotaceae	2014	0.96	0.00016	0.8	2014	103	0.01	28.19
A1249	A1	A	2011	-999	Chrysophyllum	venezuelanense	Sapotaceae	2015	1.06	0.00017	0.9	2015	104	0.01	29.02
A1249	A1	A	2011	-999	Chrysophyllum	venezuelanense	Sapotaceae	2016	0.94	0.00016	0.82	2016	105	0.01	29.88
A1250	A1	A	2011	-999	Heisteria	concinna	Erythropalaceae	2013	2.9	0.0005	2.73	2013	109	0.01	33.43
A1250	A1	A	2011	-999	Heisteria	concinna	Erythropalaceae	2014	2.87	0.00051	2.82	2014	112	0.01	36.25
A1250	A1	A	2011	-999	Heisteria	concinna	Erythropalaceae	2015	2.12	0.00039	2.16	2015	115	0.01	39.2
A1250	A1	A	2011	-999	Heisteria	concinna	Erythropalaceae	2016	1.89	0.00035	1.98	2016	117	0.01	41.25
A1251	A1	P	2011	-999	Socratea	exorrhiza	Arecaceae	2013	0	0	0	2013	121	0.01	45.51
A1251	A1	P	2011	-999	Socratea	exorrhiza	Arecaceae	2014	1.91	0.00037	2.12	2014	121	0.01	45.51
A1251	A1	P	2011	-999	Socratea	exorrhiza	Arecaceae	2015	1.06	0.00021	1.2	2015	123	0.01	47.73
A1251	A1	P	2011	-999	Socratea	exorrhiza	Arecaceae	2016	0	0	0	2016	124	0.01	48.86
A1252	A1	A	2011	-999	Goethalsia	meiantha	Malvaceae	2013	1.96	0.00035	1.91	2013	112	0.01	36.25
A1252	A1	A	2011	-999	Goethalsia	meiantha	Malvaceae	2014	0.95	0.00017	0.95	2014	114	0.01	38.2
A1252	A1	A	2011	-999	Goethalsia	meiantha	Malvaceae	2015	1.04	0.00019	1.06	2015	115	0.01	39.2
A1252	A1	A	2011	-999	Goethalsia	meiantha	Malvaceae	2016	11.62	0.00223	12.9	2016	116	0.01	40.22
A1253	A1	A	2011	-999	Virola	sebifera	Myristicaceae	2013	9.79	0.00198	11.88	2013	124	0.01	48.86
A1253	A1	A	2011	-999	Virola	sebifera	Myristicaceae	2014	4.77	0.00102	6.31	2014	134	0.01	61
A1253	A1	A	2011	-999	Virola	sebifera	Myristicaceae	2015	4.17	0.00092	5.8	2015	139	0.02	67.63
A1253	A1	A	2011	-999	Virola	sebifera	Myristicaceae	2016	6.78	0.00156	9.98	2016	143	0.02	73.19
A1254	A1	A	2012	-999	Guarea	bullata	Meliaceae	2013	1.94	0.00032	1.66	2013	104	0.01	29.02
A1254	A1	A	2012	-999	Guarea	bullata	Meliaceae	2014	2.87	0.00048	2.57	2014	106	0.01	30.74
A1254	A1	A	2012	-999	Guarea	bullata	Meliaceae	2015	1.06	0.00018	0.98	2015	109	0.01	33.43
A1254	A1	A	2012	-999	Guarea	bullata	Meliaceae	2016	4.72	0.00083	4.57	2016	110	0.01	34.35
A1255	A1	P	2012	-999	Welfia	regia	Arecaceae	2013	0.97	0.00026	1.78	2013	171	0.02	118.78
A1255	A1	P	2012	-999	Welfia	regia	Arecaceae	2014	0	0	0	2014	172	0.02	120.63
A1255	A1	P	2012	-999	Welfia	regia	Arecaceae	2015	0	0	0	2015	172	0.02	120.63
A1255	A1	P	2012	-999	Welfia	regia	Arecaceae	2016	0	0	0	2016	172	0.02	120.63
A1256	A1	A	2012	-999	Dipteryx	panamensis	Fabaceae	2013	1.96	0.00031	1.59	2013	101	0.01	26.56
A1256	A1	A	2012	-999	Dipteryx	panamensis	Fabaceae	2014	0.95	0.00015	0.8	2014	103	0.01	28.19
A1256	A1	A	2012	-999	Dipteryx	panamensis	Fabaceae	2015	0	0	0	2015	104	0.01	29.02
A1256	A1	A	2012	-999	Dipteryx	panamensis	Fabaceae	2016	3.87	0.00064	3.38	2016	104	0.01	29.02
A1259	A1	A	2013	-999	Goethalsia	meiantha	Malvaceae	2013	1.94	0.00031	1.61	2013	102	0.01	27.37
A1259	A1	A	2013	-999	Goethalsia	meiantha	Malvaceae	2014	0	0	0	2014	104	0.01	29.02
A1259	A1	A	2013	-999	Goethalsia	meiantha	Malvaceae	2015	0	0	0	2015	104	0.01	29.02
A1259	A1	A	2013	-999	Goethalsia	meiantha	Malvaceae	2016	1.89	0.00031	1.62	2016	104	0.01	29.02
A1260	A1	A	2013	-999	Pentaclethra	macroloba	Fabaceae	2013	4.89	0.00082	4.31	2013	104	0.01	29.02
A1260	A1	A	2013	-999	Pentaclethra	macroloba	Fabaceae	2014	5.72	0.00101	5.5	2014	109	0.01	33.43
A1260	A1	A	2013	-999	Pentaclethra	macroloba	Fabaceae	2015	7.3	0.00136	7.73	2015	115	0.01	39.2
A1260	A1	A	2013	-999	Pentaclethra	macroloba	Fabaceae	2016	15.49	0.00316	19.03	2016	122	0.01	46.61
A1261	A1	P	2014	-999	Welfia	regia	Arecaceae	2014	0	0	0	2014	179	0.03	133.94
A1261	A1	P	2014	-999	Welfia	regia	Arecaceae	2015	0	0	0	2015	179	0.03	133.94
A1261	A1	P	2014	-999	Welfia	regia	Arecaceae	2016	0	0	0	2016	179	0.03	133.94
A1262	A1	P	2014	-999	Welfia	regia	Arecaceae	2014	0	0	0	2014	189	0.03	154.22
A1262	A1	P	2014	-999	Welfia	regia	Arecaceae	2015	0	0	0	2015	189	0.03	154.22
A1262	A1	P	2014	-999	Welfia	regia	Arecaceae	2016	0	0	0	2016	189	0.03	154.22
A1263	A1	P	2014	-999	Welfia	regia	Arecaceae	2014	0	0	0	2014	180	0.03	135.9
A1263	A1	P	2014	-999	Welfia	regia	Arecaceae	2015	0	0	0	2015	180	0.03	135.9
A1263	A1	P	2014	-999	Welfia	regia	Arecaceae	2016	0	0	0	2016	180	0.03	135.9
A1264	A1	P	2014	-999	Welfia	regia	Arecaceae	2014	0	0	0	2014	179	0.03	133.94
A1264	A1	P	2014	-999	Welfia	regia	Arecaceae	2015	0	0	0	2015	179	0.03	133.94
A1264	A1	P	2014	-999	Welfia	regia	Arecaceae	2016	0	0	0	2016	179	0.03	133.94
A1265	A1	P	2015	-999	Welfia	regia	Arecaceae	2015	0	0	0	2015	200	0.03	178.24
A1265	A1	P	2015	-999	Welfia	regia	Arecaceae	2016	0	0	0	2016	200	0.03	178.24
A1266	A1	A	2015	-999	Goethalsia	meiantha	Malvaceae	2015	13.6	0.00236	12.78	2015	104	0.01	29.02
A1266	A1	A	2015	-999	Goethalsia	meiantha	Malvaceae	2016	36.78	0.00789	48.73	2016	117	0.01	41.25
A1267	A1	A	2015	-999	Pleuranthodendron	lindenii	Salicaceae	2015	1.05	0.00017	0.83	2015	100	0.01	25.77
A1267	A1	A	2015	-999	Pleuranthodendron	lindenii	Salicaceae	2016	0	0	0	2016	101	0.01	26.56
A1268	A1	A	2015	-999	Anaxagorea	crassipetala	Annonaceae	2015	0	0	0	2015	100	0.01	25.77
A1268	A1	A	2015	-999	Anaxagorea	crassipetala	Annonaceae	2016	4.72	0.00076	3.87	2016	100	0.01	25.77
A127	A1	A	1997	2017	Protium	panamense	Burseraceae	2013	0.97	0.00022	1.41	2013	145	0.02	76.06
A127	A1	A	1997	2017	Protium	panamense	Burseraceae	2014	0.96	0.00022	1.41	2014	146	0.02	77.52
A127	A1	A	1997	2017	Protium	panamense	Burseraceae	2015	0	0	0	2015	147	0.02	78.99
A1270	A1	A	2015	-999	Guatteria	aeruginosa	Annonaceae	2015	8.34	0.00139	7.29	2015	102	0.01	27.37
A1270	A1	A	2015	-999	Guatteria	aeruginosa	Annonaceae	2016	12.59	0.0023	12.95	2016	110	0.01	34.35
A1271	A1	P	2016	-999	Welfia	regia	Arecaceae	2016	0	0	0	2016	182	0.03	139.87
A1272	A1	P	2016	-999	Welfia	regia	Arecaceae	2016	0	0	0	2016	185	0.03	145.93
A1273	A1	A	2016	-999	Goethalsia	meiantha	Malvaceae	2016	8.49	0.00143	7.6	2016	103	0.01	28.19
A1274	A1	A	2016	-999	Pentaclethra	macroloba	Fabaceae	2016	8.71	0.0015	8.06	2016	105	0.01	29.88
A1275	A1	A	2016	-999	Ocotea	cernua	Lauraceae	2016	7.75	0.0013	6.88	2016	103	0.01	28.19
A1276	A1	A	2016	-999	Unidentified	Unidentified	Unidentified	2016	1.94	0.00034	1.86	2016	111	0.01	35.29
A13	A1	A	1997	-999	Rauvolfia	purpurascens	Apocynaceae	2013	0	0	0	2013	334	0.09	614.58
A13	A1	A	1997	-999	Rauvolfia	purpurascens	Apocynaceae	2014	0.96	0.0005	4.07	2014	334	0.09	614.58
A13	A1	A	1997	-999	Rauvolfia	purpurascens	Apocynaceae	2015	1.06	0.00056	4.52	2015	335	0.09	618.84
A13	A1	A	1997	-999	Rauvolfia	purpurascens	Apocynaceae	2016	0.94	0.0005	4.04	2016	336	0.09	623.11
A130	A1	A	1997	-999	Preslianthus	pittieri	Capparaceae	2013	0	0	0	2013	128	0.01	53.54
A130	A1	A	1997	-999	Preslianthus	pittieri	Capparaceae	2014	0	0	0	2014	128	0.01	53.54
A130	A1	A	1997	-999	Preslianthus	pittieri	Capparaceae	2015	0	0	0	2015	128	0.01	53.54
A130	A1	A	1997	-999	Preslianthus	pittieri	Capparaceae	2016	0.94	0.00019	1.14	2016	128	0.01	53.54
A131	A1	A	1997	-999	Dussia	macroprophyllata	Fabaceae	2013	3.87	0.00129	9.46	2013	210	0.03	201.62
A131	A1	A	1997	-999	Dussia	macroprophyllata	Fabaceae	2014	6.69	0.00229	16.88	2014	214	0.04	211.39
A131	A1	A	1997	-999	Dussia	macroprophyllata	Fabaceae	2015	1.06	0.00037	2.73	2015	221	0.04	229.06
A131	A1	A	1997	-999	Dussia	macroprophyllata	Fabaceae	2016	1.89	0.00066	4.91	2016	222	0.04	231.64
A132	A1	P	1997	2016	Welfia	regia	Arecaceae	2013	0	0	0	2013	156	0.02	92.92
A132	A1	P	1997	2016	Welfia	regia	Arecaceae	2014	0	0	0	2014	156	0.02	92.92
A134	A1	P	1997	-999	Iriartea	deltoidea	Arecaceae	2013	0	0	0	2013	199	0.03	175.98
A134	A1	P	1997	-999	Iriartea	deltoidea	Arecaceae	2014	0	0	0	2014	199	0.03	175.98
A134	A1	P	1997	-999	Iriartea	deltoidea	Arecaceae	2015	0	0	0	2015	199	0.03	175.98
A134	A1	P	1997	-999	Iriartea	deltoidea	Arecaceae	2016	0	0	0	2016	199	0.03	175.98
A136	A1	P	1997	-999	Socratea	exorrhiza	Arecaceae	2013	0	0	0	2013	142	0.02	71.78
A136	A1	P	1997	-999	Socratea	exorrhiza	Arecaceae	2014	0	0	0	2014	142	0.02	71.78
A136	A1	P	1997	-999	Socratea	exorrhiza	Arecaceae	2015	0	0	0	2015	142	0.02	71.78
A136	A1	P	1997	-999	Socratea	exorrhiza	Arecaceae	2016	0	0	0	2016	142	0.02	71.78
A138	A1	P	1997	-999	Welfia	regia	Arecaceae	2013	0	0	0	2013	165	0.02	108.04
A138	A1	P	1997	-999	Welfia	regia	Arecaceae	2014	0	0	0	2014	165	0.02	108.04
A138	A1	P	1997	-999	Welfia	regia	Arecaceae	2015	0	0	0	2015	165	0.02	108.04
A138	A1	P	1997	-999	Welfia	regia	Arecaceae	2016	0	0	0	2016	165	0.02	108.04
A139	A1	A	1997	-999	Apeiba	membranacea	Malvaceae	2013	12.59	0.00796	66.22	2013	396	0.12	906.4
A139	A1	A	1997	-999	Apeiba	membranacea	Malvaceae	2014	8.6	0.00559	46.65	2014	409	0.13	974.8
A139	A1	A	1997	-999	Apeiba	membranacea	Malvaceae	2015	2.12	0.00139	11.65	2015	418	0.14	1023.62
A139	A1	A	1997	-999	Apeiba	membranacea	Malvaceae	2016	0.94	0.00062	5.21	2016	420	0.14	1034.63
A14	A1	A	1997	-999	Pentaclethra	macroloba	Fabaceae	2013	1.94	0.00263	23.47	2013	865	0.59	4956.73
A14	A1	A	1997	-999	Pentaclethra	macroloba	Fabaceae	2014	4.78	0.00653	58.16	2014	867	0.59	4980.97
A14	A1	A	1997	-999	Pentaclethra	macroloba	Fabaceae	2015	2.12	0.0029	25.87	2015	872	0.6	5041.84
A14	A1	A	1997	-999	Pentaclethra	macroloba	Fabaceae	2016	0	0	0	2016	874	0.6	5066.29
A141	A1	P	1997	-999	Welfia	regia	Arecaceae	2013	0	0	0	2013	159	0.02	97.82
A141	A1	P	1997	-999	Welfia	regia	Arecaceae	2014	0	0	0	2014	159	0.02	97.82
A141	A1	P	1997	-999	Welfia	regia	Arecaceae	2015	0	0	0	2015	159	0.02	97.82
A141	A1	P	1997	-999	Welfia	regia	Arecaceae	2016	0	0	0	2016	159	0.02	97.82
A143	A1	A	1997	-999	Cupania	pseudostipularis	Sapindaceae	2013	0	0	0	2013	217	0.04	218.88
A143	A1	A	1997	-999	Cupania	pseudostipularis	Sapindaceae	2014	0.96	0.00033	2.41	2014	217	0.04	218.88
A143	A1	A	1997	-999	Cupania	pseudostipularis	Sapindaceae	2015	0	0	0	2015	218	0.04	221.4
A143	A1	A	1997	-999	Cupania	pseudostipularis	Sapindaceae	2016	1.89	0.00065	4.8	2016	218	0.04	221.4
A144	A1	A	1997	2017	Pentaclethra	macroloba	Fabaceae	2013	1.94	0.00156	13.38	2013	513	0.21	1612.06
A144	A1	A	1997	2017	Pentaclethra	macroloba	Fabaceae	2014	1.91	0.00155	13.27	2014	515	0.21	1625.88
A144	A1	A	1997	2017	Pentaclethra	macroloba	Fabaceae	2015	0	0	0	2015	517	0.21	1639.77
A145	A1	P	1997	-999	Welfia	regia	Arecaceae	2013	0	0	0	2013	194	0.03	164.92
A145	A1	P	1997	-999	Welfia	regia	Arecaceae	2014	0	0	0	2014	194	0.03	164.92
A145	A1	P	1997	-999	Welfia	regia	Arecaceae	2015	0	0	0	2015	194	0.03	164.92
A145	A1	P	1997	-999	Welfia	regia	Arecaceae	2016	0	0	0	2016	194	0.03	164.92
A146	A1	A	1997	2017	Pentaclethra	macroloba	Fabaceae	2013	4.84	0.004	34.36	2013	524	0.22	1688.82
A146	A1	A	1997	2017	Pentaclethra	macroloba	Fabaceae	2014	7.64	0.0064	54.98	2014	529	0.22	1724.31
A146	A1	A	1997	2017	Pentaclethra	macroloba	Fabaceae	2015	8.46	0.00719	61.88	2015	537	0.23	1781.85
A147	A1	A	1997	-999	Pentaclethra	macroloba	Fabaceae	2013	3.87	0.00331	28.49	2013	542	0.23	1818.3
A147	A1	A	1997	-999	Pentaclethra	macroloba	Fabaceae	2014	5.73	0.00494	42.6	2014	546	0.23	1847.72
A147	A1	A	1997	-999	Pentaclethra	macroloba	Fabaceae	2015	5.29	0.00461	39.73	2015	552	0.24	1892.3
A147	A1	A	1997	-999	Pentaclethra	macroloba	Fabaceae	2016	0.94	0.00083	7.13	2016	557	0.24	1929.86
A148	A1	A	1997	-999	Guarea	gentryi	Meliaceae	2013	0	0	0	2013	141	0.02	70.38
A148	A1	A	1997	-999	Guarea	gentryi	Meliaceae	2014	0	0	0	2014	141	0.02	70.38
A148	A1	A	1997	-999	Guarea	gentryi	Meliaceae	2015	1.06	0.00024	1.48	2015	141	0.02	70.38
A148	A1	A	1997	-999	Guarea	gentryi	Meliaceae	2016	0	0	0	2016	142	0.02	71.78
A15	A1	P	1997	-999	Welfia	regia	Arecaceae	2013	0	0	0	2013	149	0.02	81.98
A15	A1	P	1997	-999	Welfia	regia	Arecaceae	2014	0	0	0	2014	149	0.02	81.98
A15	A1	P	1997	-999	Welfia	regia	Arecaceae	2015	0	0	0	2015	149	0.02	81.98
A15	A1	P	1997	-999	Welfia	regia	Arecaceae	2016	0	0	0	2016	149	0.02	81.98
A150	A1	A	1997	-999	Pentaclethra	macroloba	Fabaceae	2013	9.68	0.00998	87.27	2013	651	0.33	2704.78
A150	A1	A	1997	-999	Pentaclethra	macroloba	Fabaceae	2014	9.55	0.01	87.54	2014	661	0.34	2794.92
A150	A1	A	1997	-999	Pentaclethra	macroloba	Fabaceae	2015	7.41	0.00785	68.78	2015	671	0.35	2886.53
A150	A1	A	1997	-999	Pentaclethra	macroloba	Fabaceae	2016	10.37	0.01114	97.73	2016	678	0.36	2951.55
A151	A1	P	1997	-999	Welfia	regia	Arecaceae	2013	0	0	0	2013	167	0.02	111.56
A151	A1	P	1997	-999	Welfia	regia	Arecaceae	2014	0	0	0	2014	167	0.02	111.56
A151	A1	P	1997	-999	Welfia	regia	Arecaceae	2015	0	0	0	2015	167	0.02	111.56
A151	A1	P	1997	-999	Welfia	regia	Arecaceae	2016	0	0	0	2016	167	0.02	111.56
A152	A1	A	1997	-999	Pentaclethra	macroloba	Fabaceae	2013	0	0	0	2013	290	0.07	442
A152	A1	A	1997	-999	Pentaclethra	macroloba	Fabaceae	2014	0	0	0	2014	290	0.07	442
A152	A1	A	1997	-999	Pentaclethra	macroloba	Fabaceae	2015	1.06	0.00048	3.81	2015	290	0.07	442
A152	A1	A	1997	-999	Pentaclethra	macroloba	Fabaceae	2016	0	0	0	2016	291	0.07	445.6
A153	A1	A	1997	-999	Pentaclethra	macroloba	Fabaceae	2013	14.52	0.00628	49.12	2013	268	0.06	366.45
A153	A1	A	1997	-999	Pentaclethra	macroloba	Fabaceae	2014	18.15	0.00834	65.97	2014	283	0.06	417.19
A153	A1	A	1997	-999	Pentaclethra	macroloba	Fabaceae	2015	9.52	0.00458	36.57	2015	302	0.07	486.23
A153	A1	A	1997	-999	Pentaclethra	macroloba	Fabaceae	2016	15.09	0.00756	60.75	2016	311	0.08	520.79
A154	A1	A	1997	-999	Annona	subnubila	Annonaceae	2013	0	0	0	2013	112	0.01	36.25
A154	A1	A	1997	-999	Annona	subnubila	Annonaceae	2014	0	0	0	2014	112	0.01	36.25
A154	A1	A	1997	-999	Annona	subnubila	Annonaceae	2015	1.06	0.00019	1.03	2015	112	0.01	36.25
A154	A1	A	1997	-999	Annona	subnubila	Annonaceae	2016	4.72	0.00086	4.78	2016	113	0.01	37.22
A156	A1	A	1997	2017	Pentaclethra	macroloba	Fabaceae	2013	7.75	0.01219	109.48	2013	998	0.78	6697.82
A156	A1	A	1997	2017	Pentaclethra	macroloba	Fabaceae	2014	7.64	0.01213	108.95	2014	1006	0.79	6810.89
A156	A1	A	1997	2017	Pentaclethra	macroloba	Fabaceae	2015	-1.06	-0.00168	-15.13	2015	1014	0.81	6924.91
A157	A1	P	1997	-999	Welfia	regia	Arecaceae	2013	0	0	0	2013	177	0.02	130.06
A157	A1	P	1997	-999	Welfia	regia	Arecaceae	2014	0	0	0	2014	177	0.02	130.06
A157	A1	P	1997	-999	Welfia	regia	Arecaceae	2015	0	0	0	2015	177	0.02	130.06
A157	A1	P	1997	-999	Welfia	regia	Arecaceae	2016	0	0	0	2016	177	0.02	130.06
A158	A1	A	1997	-999	Protium	panamense	Burseraceae	2013	4.84	0.00258	20.96	2013	337	0.09	627.39
A158	A1	A	1997	-999	Protium	panamense	Burseraceae	2014	2.87	0.00155	12.58	2014	342	0.09	649.04
A158	A1	A	1997	-999	Protium	panamense	Burseraceae	2015	3.17	0.00173	14.07	2015	345	0.09	662.2
A158	A1	A	1997	-999	Protium	panamense	Burseraceae	2016	9.43	0.00523	42.72	2016	348	0.1	675.5
A159	A1	A	1997	-999	Zygia	gigantifoliola	Fabaceae	2013	0	0	0	2013	133	0.01	59.72
A159	A1	A	1997	-999	Zygia	gigantifoliola	Fabaceae	2014	0	0	0	2014	133	0.01	59.72
A159	A1	A	1997	-999	Zygia	gigantifoliola	Fabaceae	2015	0	0	0	2015	133	0.01	59.72
A159	A1	A	1997	-999	Zygia	gigantifoliola	Fabaceae	2016	0	0	0	2016	133	0.01	59.72
A16	A1	P	1997	2017	Socratea	exorrhiza	Arecaceae	2013	0	0	0	2013	158	0.02	96.17
A16	A1	P	1997	2017	Socratea	exorrhiza	Arecaceae	2014	0	0	0	2014	158	0.02	96.17
A16	A1	P	1997	2017	Socratea	exorrhiza	Arecaceae	2015	0	0	0	2015	158	0.02	96.17
A162	A1	A	1997	-999	Pterocarpus	sp. A	Fabaceae	2013	5.81	0.00184	13.33	2013	199	0.03	175.98
A162	A1	A	1997	-999	Pterocarpus	sp. A	Fabaceae	2014	12.42	0.00413	30.25	2014	205	0.03	189.75
A162	A1	A	1997	-999	Pterocarpus	sp. A	Fabaceae	2015	12.7	0.00447	33.26	2015	218	0.04	221.4
A162	A1	A	1997	-999	Pterocarpus	sp. A	Fabaceae	2016	12.26	0.00455	34.39	2016	230	0.04	252.84
A163	A1	P	1997	-999	Welfia	regia	Arecaceae	2013	0	0	0	2013	174	0.02	124.36
A163	A1	P	1997	-999	Welfia	regia	Arecaceae	2014	0	0	0	2014	174	0.02	124.36
A163	A1	P	1997	-999	Welfia	regia	Arecaceae	2015	0	0	0	2015	174	0.02	124.36
A163	A1	P	1997	-999	Welfia	regia	Arecaceae	2016	0	0	0	2016	174	0.02	124.36
A165	A1	A	1997	-999	Pentaclethra	macroloba	Fabaceae	2013	2.9	0.00341	29.22	2013	746	0.44	3620.82
A165	A1	A	1997	-999	Pentaclethra	macroloba	Fabaceae	2014	3.82	0.00451	39.82	2014	749	0.44	3651.92
A165	A1	A	1997	-999	Pentaclethra	macroloba	Fabaceae	2015	5.29	0.00628	55.47	2015	753	0.45	3693.6
A165	A1	A	1997	-999	Pentaclethra	macroloba	Fabaceae	2016	6.6	0.0079	69.82	2016	758	0.45	3746.03
A166	A1	A	1997	-999	Rauvolfia	purpurascens	Apocynaceae	2013	0	0	0	2013	195	0.03	167.1
A166	A1	A	1997	-999	Rauvolfia	purpurascens	Apocynaceae	2014	0	0	0	2014	195	0.03	167.1
A166	A1	A	1997	-999	Rauvolfia	purpurascens	Apocynaceae	2015	0	0	0	2015	195	0.03	167.1
A166	A1	A	1997	-999	Rauvolfia	purpurascens	Apocynaceae	2016	0	0	0	2016	195	0.03	167.1
A169	A1	A	1997	-999	Pentaclethra	macroloba	Fabaceae	2013	4.84	0.00415	35.72	2013	543	0.23	1825.63
A169	A1	A	1997	-999	Pentaclethra	macroloba	Fabaceae	2014	2.87	0.00247	21.32	2014	548	0.24	1862.52
A169	A1	A	1997	-999	Pentaclethra	macroloba	Fabaceae	2015	3.17	0.00275	23.75	2015	551	0.24	1884.83
A169	A1	A	1997	-999	Pentaclethra	macroloba	Fabaceae	2016	0	0	0	2016	554	0.24	1907.28
A170	A1	P	1997	-999	Welfia	regia	Arecaceae	2013	0.97	0.00022	1.4	2013	144	0.02	74.62
A170	A1	P	1997	-999	Welfia	regia	Arecaceae	2014	0	0	0	2014	145	0.02	76.06
A170	A1	P	1997	-999	Welfia	regia	Arecaceae	2015	0	0	0	2015	145	0.02	76.06
A170	A1	P	1997	-999	Welfia	regia	Arecaceae	2016	0	0	0	2016	145	0.02	76.06
A171	A1	A	1997	2015	Pentaclethra	macroloba	Fabaceae	2013	-8.71	-0.00877	-76.54	2013	645	0.33	2651.41
A172	A1	A	1997	-999	Pentaclethra	macroloba	Fabaceae	2013	7.75	0.00257	18.8	2013	207	0.03	194.45
A172	A1	A	1997	-999	Pentaclethra	macroloba	Fabaceae	2014	8.6	0.00297	21.96	2014	215	0.04	213.87
A172	A1	A	1997	-999	Pentaclethra	macroloba	Fabaceae	2015	9.52	0.00342	25.58	2015	224	0.04	236.85
A172	A1	A	1997	-999	Pentaclethra	macroloba	Fabaceae	2016	16.03	0.00608	46.16	2016	233	0.04	261.03
A175	A1	P	1997	-999	Welfia	regia	Arecaceae	2013	0	0	0	2013	209	0.03	199.22
A175	A1	P	1997	-999	Welfia	regia	Arecaceae	2014	0	0	0	2014	209	0.03	199.22
A175	A1	P	1997	-999	Welfia	regia	Arecaceae	2015	0	0	0	2015	209	0.03	199.22
A175	A1	P	1997	-999	Welfia	regia	Arecaceae	2016	0	0	0	2016	209	0.03	199.22
A177	A1	A	1997	-999	Rinorea	deflexiflora	Violaceae	2013	0	0	0	2013	130	0.01	55.97
A177	A1	A	1997	-999	Rinorea	deflexiflora	Violaceae	2014	0.96	0.0002	1.18	2014	130	0.01	55.97
A177	A1	A	1997	-999	Rinorea	deflexiflora	Violaceae	2015	1.06	0.00022	1.32	2015	131	0.01	57.2
A177	A1	A	1997	-999	Rinorea	deflexiflora	Violaceae	2016	0.94	0.0002	1.19	2016	132	0.01	58.46
A178	A1	P	1997	-999	Welfia	regia	Arecaceae	2013	0	0	0	2013	166	0.02	109.79
A178	A1	P	1997	-999	Welfia	regia	Arecaceae	2014	0	0	0	2014	166	0.02	109.79
A178	A1	P	1997	-999	Welfia	regia	Arecaceae	2015	0	0	0	2015	166	0.02	109.79
A178	A1	P	1997	-999	Welfia	regia	Arecaceae	2016	0	0	0	2016	166	0.02	109.79
A181	A1	P	1997	-999	Welfia	regia	Arecaceae	2013	0	0	0	2013	167	0.02	111.56
A181	A1	P	1997	-999	Welfia	regia	Arecaceae	2014	0	0	0	2014	167	0.02	111.56
A181	A1	P	1997	-999	Welfia	regia	Arecaceae	2015	0	0	0	2015	167	0.02	111.56
A181	A1	P	1997	-999	Welfia	regia	Arecaceae	2016	0	0	0	2016	167	0.02	111.56
A182	A1	P	1997	-999	Welfia	regia	Arecaceae	2013	0	0	0	2013	174	0.02	124.36
A182	A1	P	1997	-999	Welfia	regia	Arecaceae	2014	0	0	0	2014	174	0.02	124.36
A182	A1	P	1997	-999	Welfia	regia	Arecaceae	2015	0	0	0	2015	174	0.02	124.36
A182	A1	P	1997	-999	Welfia	regia	Arecaceae	2016	0	0	0	2016	174	0.02	124.36
A183	A1	A	1997	-999	Pentaclethra	macroloba	Fabaceae	2013	8.71	0.00793	68.67	2013	575	0.26	2068.12
A183	A1	A	1997	-999	Pentaclethra	macroloba	Fabaceae	2014	16.24	0.01512	131.14	2014	584	0.27	2139.06
A183	A1	A	1997	-999	Pentaclethra	macroloba	Fabaceae	2015	12.7	0.0121	105.23	2015	601	0.28	2276.31
A183	A1	A	1997	-999	Pentaclethra	macroloba	Fabaceae	2016	15.09	0.01472	128.2	2016	613	0.3	2375.77
A184	A1	A	1997	-999	Rinorea	deflexiflora	Violaceae	2013	0	0	0	2013	141	0.02	70.38
A184	A1	A	1997	-999	Rinorea	deflexiflora	Violaceae	2014	0	0	0	2014	141	0.02	70.38
A184	A1	A	1997	-999	Rinorea	deflexiflora	Violaceae	2015	0	0	0	2015	141	0.02	70.38
A184	A1	A	1997	-999	Rinorea	deflexiflora	Violaceae	2016	1.89	0.00042	2.65	2016	141	0.02	70.38
A185	A1	P	1997	-999	Welfia	regia	Arecaceae	2013	0	0	0	2013	168	0.02	113.34
A185	A1	P	1997	-999	Welfia	regia	Arecaceae	2014	0	0	0	2014	168	0.02	113.34
A185	A1	P	1997	-999	Welfia	regia	Arecaceae	2015	0	0	0	2015	168	0.02	113.34
A185	A1	P	1997	-999	Welfia	regia	Arecaceae	2016	0	0	0	2016	168	0.02	113.34
A187	A1	A	1997	-999	Inga	leiocalycina	Fabaceae	2013	0.97	0.0007	5.9	2013	458	0.16	1255.1
A187	A1	A	1997	-999	Inga	leiocalycina	Fabaceae	2014	0.96	0.00069	5.83	2014	459	0.17	1261.19
A187	A1	A	1997	-999	Inga	leiocalycina	Fabaceae	2015	3.17	0.0023	19.47	2015	460	0.17	1267.3
A187	A1	A	1997	-999	Inga	leiocalycina	Fabaceae	2016	1.89	0.00137	11.64	2016	463	0.17	1285.7
A188	A1	A	1997	-999	Cupania	pseudostipularis	Sapindaceae	2013	0.97	0.00024	1.58	2013	157	0.02	94.54
A188	A1	A	1997	-999	Cupania	pseudostipularis	Sapindaceae	2014	1.91	0.00048	3.17	2014	158	0.02	96.17
A188	A1	A	1997	-999	Cupania	pseudostipularis	Sapindaceae	2015	1.06	0.00027	1.78	2015	160	0.02	99.49
A188	A1	A	1997	-999	Cupania	pseudostipularis	Sapindaceae	2016	0.94	0.00024	1.6	2016	161	0.02	101.17
A189	A1	A	1997	-999	Pentaclethra	macroloba	Fabaceae	2013	3.92	0.00316	27.01	2013	510	0.2	1591.43
A189	A1	A	1997	-999	Pentaclethra	macroloba	Fabaceae	2014	3.82	0.0031	26.53	2014	514	0.21	1618.96
A189	A1	A	1997	-999	Pentaclethra	macroloba	Fabaceae	2015	3.17	0.00259	22.2	2015	518	0.21	1646.73
A189	A1	A	1997	-999	Pentaclethra	macroloba	Fabaceae	2016	3.77	0.0031	26.58	2016	521	0.21	1667.71
A19	A1	A	1997	2017	Virola	sebifera	Myristicaceae	2013	4.84	0.00175	13.08	2013	227	0.04	244.78
A19	A1	A	1997	2017	Virola	sebifera	Myristicaceae	2014	4.78	0.00176	13.26	2014	232	0.04	258.29
A19	A1	A	1997	2017	Virola	sebifera	Myristicaceae	2015	2.12	0.00079	5.98	2015	237	0.04	272.16
A190	A1	A	1997	-999	Lecythis	ampla	Lecythidaceae	2013	6.87	0.00179	12.05	2013	162	0.02	102.86
A190	A1	A	1997	-999	Lecythis	ampla	Lecythidaceae	2014	4.78	0.00129	8.8	2014	169	0.02	115.14
A190	A1	A	1997	-999	Lecythis	ampla	Lecythidaceae	2015	3.17	0.00087	6.04	2015	174	0.02	124.36
A190	A1	A	1997	-999	Lecythis	ampla	Lecythidaceae	2016	12.26	0.00353	24.77	2016	177	0.02	130.06
A191	A1	A	1997	-999	Colubrina	spinosa	Rhamnaceae	2013	0	0	0	2013	104	0.01	29.02
A191	A1	A	1997	-999	Colubrina	spinosa	Rhamnaceae	2014	0	0	0	2014	104	0.01	29.02
A191	A1	A	1997	-999	Colubrina	spinosa	Rhamnaceae	2015	0	0	0	2015	104	0.01	29.02
A191	A1	A	1997	-999	Colubrina	spinosa	Rhamnaceae	2016	0.94	0.00015	0.8	2016	104	0.01	29.02
A192	A1	A	1997	-999	Sapranthus	viridiflorus	Annonaceae	2013	0.98	0.0003	2.14	2013	194	0.03	164.92
A192	A1	A	1997	-999	Sapranthus	viridiflorus	Annonaceae	2014	0	0	0	2014	195	0.03	167.1
A192	A1	A	1997	-999	Sapranthus	viridiflorus	Annonaceae	2015	0	0	0	2015	195	0.03	167.1
A192	A1	A	1997	-999	Sapranthus	viridiflorus	Annonaceae	2016	0	0	0	2016	195	0.03	167.1
A193	A1	P	1997	-999	Welfia	regia	Arecaceae	2013	0	0	0	2013	150	0.02	83.5
A193	A1	P	1997	-999	Welfia	regia	Arecaceae	2014	0	0	0	2014	150	0.02	83.5
A193	A1	P	1997	-999	Welfia	regia	Arecaceae	2015	0	0	0	2015	150	0.02	83.5
A193	A1	P	1997	-999	Welfia	regia	Arecaceae	2016	0	0	0	2016	150	0.02	83.5
A194	A1	A	1997	-999	Pentaclethra	macroloba	Fabaceae	2013	1.96	0.00162	13.9	2013	526	0.22	1702.97
A194	A1	A	1997	-999	Pentaclethra	macroloba	Fabaceae	2014	1.91	0.00158	13.6	2014	528	0.22	1717.18
A194	A1	A	1997	-999	Pentaclethra	macroloba	Fabaceae	2015	2.09	0.00174	14.94	2015	530	0.22	1731.45
A194	A1	A	1997	-999	Pentaclethra	macroloba	Fabaceae	2016	4.8	0.00403	34.65	2016	532	0.22	1745.78
A195	A1	A	1997	2017	Rauvolfia	purpurascens	Apocynaceae	2013	0	0	0	2013	157	0.02	94.54
A195	A1	A	1997	2017	Rauvolfia	purpurascens	Apocynaceae	2014	0	0	0	2014	157	0.02	94.54
A195	A1	A	1997	2017	Rauvolfia	purpurascens	Apocynaceae	2015	0	0	0	2015	157	0.02	94.54
A196	A1	A	1997	-999	Pentaclethra	macroloba	Fabaceae	2013	4.83	0.00317	26.48	2013	415	0.14	1007.21
A196	A1	A	1997	-999	Pentaclethra	macroloba	Fabaceae	2014	8.58	0.00572	47.92	2014	420	0.14	1034.63
A196	A1	A	1997	-999	Pentaclethra	macroloba	Fabaceae	2015	5.32	0.00361	30.28	2015	429	0.14	1084.92
A196	A1	A	1997	-999	Pentaclethra	macroloba	Fabaceae	2016	8.55	0.00589	49.57	2016	434	0.15	1113.37
A197	A1	P	1997	-999	Welfia	regia	Arecaceae	2013	0	0	0	2013	148	0.02	80.48
A197	A1	P	1997	-999	Welfia	regia	Arecaceae	2014	0	0	0	2014	148	0.02	80.48
A197	A1	P	1997	-999	Welfia	regia	Arecaceae	2015	0	0	0	2015	148	0.02	80.48
A197	A1	P	1997	-999	Welfia	regia	Arecaceae	2016	0	0	0	2016	148	0.02	80.48
A198	A1	P	1997	-999	Welfia	regia	Arecaceae	2013	0	0	0	2013	217	0.04	218.88
A198	A1	P	1997	-999	Welfia	regia	Arecaceae	2014	0	0	0	2014	217	0.04	218.88
A198	A1	P	1997	-999	Welfia	regia	Arecaceae	2015	0	0	0	2015	217	0.04	218.88
A198	A1	P	1997	-999	Welfia	regia	Arecaceae	2016	0	0	0	2016	217	0.04	218.88
A199	A1	A	1997	-999	Rauvolfia	purpurascens	Apocynaceae	2013	5.87	0.00166	11.56	2013	177	0.02	130.06
A199	A1	A	1997	-999	Rauvolfia	purpurascens	Apocynaceae	2014	6.67	0.00195	13.77	2014	183	0.03	141.88
A199	A1	A	1997	-999	Rauvolfia	purpurascens	Apocynaceae	2015	0	0	0	2015	190	0.03	156.33
A199	A1	A	1997	-999	Rauvolfia	purpurascens	Apocynaceae	2016	8.71	0.00266	19.02	2016	190	0.03	156.33
A21	A2	A	1997	-999	Virola	koschnyi	Myristicaceae	2013	6.81	0.0051	43.31	2013	473	0.18	1348.01
A21	A2	A	1997	-999	Virola	koschnyi	Myristicaceae	2014	22.69	0.01754	149.47	2014	480	0.18	1392.51
A21	A2	A	1997	-999	Virola	koschnyi	Myristicaceae	2015	4.23	0.00336	28.75	2015	504	0.2	1550.58
A21	A2	A	1997	-999	Virola	koschnyi	Myristicaceae	2016	8.67	0.00698	59.72	2016	508	0.2	1577.76
A210	A2	P	1997	-999	Welfia	regia	Arecaceae	2013	0	0	0	2013	155	0.02	91.31
A210	A2	P	1997	-999	Welfia	regia	Arecaceae	2014	0	0	0	2014	155	0.02	91.31
A210	A2	P	1997	-999	Welfia	regia	Arecaceae	2015	0	0	0	2015	155	0.02	91.31
A210	A2	P	1997	-999	Welfia	regia	Arecaceae	2016	0	0	0	2016	155	0.02	91.31
A2100	A2	A	1997	-999	Ampelocera	macrocarpa	Ulmaceae	2013	0.97	0.00061	5.06	2013	398	0.12	916.76
A2100	A2	A	1997	-999	Ampelocera	macrocarpa	Ulmaceae	2014	1.89	0.00119	9.88	2014	399	0.13	921.96
A2100	A2	A	1997	-999	Ampelocera	macrocarpa	Ulmaceae	2015	0	0	0	2015	401	0.13	932.41
A2100	A2	A	1997	-999	Ampelocera	macrocarpa	Ulmaceae	2016	0.96	0.00061	5.05	2016	401	0.13	932.41
A2101	A2	P	1997	2016	Welfia	regia	Arecaceae	2013	0	0	0	2013	157	0.02	94.54
A2101	A2	P	1997	2016	Welfia	regia	Arecaceae	2014	0	0	0	2014	157	0.02	94.54
A2102	A2	A	1997	-999	Pentaclethra	macroloba	Fabaceae	2013	1.95	0.00119	9.88	2013	389	0.12	870.6
A2102	A2	A	1997	-999	Pentaclethra	macroloba	Fabaceae	2014	12.29	0.00768	63.77	2014	391	0.12	880.75
A2102	A2	A	1997	-999	Pentaclethra	macroloba	Fabaceae	2015	10.58	0.0068	56.69	2015	404	0.13	948.19
A2102	A2	A	1997	-999	Pentaclethra	macroloba	Fabaceae	2016	9.63	0.00634	53.03	2016	414	0.13	1001.77
A2103	A2	A	1997	2017	Siparuna	cuspidata	Siparunaceae	2013	0.97	0.00037	2.83	2013	243	0.05	289.3
A2103	A2	A	1997	2017	Siparuna	cuspidata	Siparunaceae	2014	0	0	0	2014	244	0.05	292.21
A2103	A2	A	1997	2017	Siparuna	cuspidata	Siparunaceae	2015	0	0	0	2015	244	0.05	292.21
A2104	A2	L	1997	-999	Pinzona	coriacea	Dilleniaceae	2013	0	0	0	2013	141	0.02	70.38
A2104	A2	L	1997	-999	Pinzona	coriacea	Dilleniaceae	2014	0.95	0.00021	1.32	2014	141	0.02	70.38
A2104	A2	L	1997	-999	Pinzona	coriacea	Dilleniaceae	2015	0	0	0	2015	142	0.02	71.78
A2104	A2	L	1997	-999	Pinzona	coriacea	Dilleniaceae	2016	0.96	0.00022	1.36	2016	142	0.02	71.78
A2106	A2	A	1997	-999	Virola	sebifera	Myristicaceae	2013	0.97	0.00064	5.31	2013	415	0.14	1007.21
A2106	A2	A	1997	-999	Virola	sebifera	Myristicaceae	2014	0.95	0.00062	5.17	2014	416	0.14	1012.67
A2106	A2	A	1997	-999	Virola	sebifera	Myristicaceae	2015	4.23	0.00279	23.3	2015	417	0.14	1018.14
A2106	A2	A	1997	-999	Virola	sebifera	Myristicaceae	2016	0.96	0.00064	5.34	2016	421	0.14	1040.16
A2108	A2	A	1997	2015	Clethra	costaricensis	Clethraceae	2013	5.84	0.0017	11.93	2013	182	0.03	139.87
A2109	A2	A	1997	-999	Pentaclethra	macroloba	Fabaceae	2013	8.76	0.00884	77.21	2013	638	0.32	2589.82
A2109	A2	A	1997	-999	Pentaclethra	macroloba	Fabaceae	2014	6.62	0.00676	59.12	2014	647	0.33	2669.14
A2109	A2	A	1997	-999	Pentaclethra	macroloba	Fabaceae	2015	8.46	0.00875	76.54	2015	654	0.34	2731.67
A2109	A2	A	1997	-999	Pentaclethra	macroloba	Fabaceae	2016	10.59	0.01111	97.29	2016	662	0.34	2804.01
A211	A2	P	1997	-999	Welfia	regia	Arecaceae	2013	0	0	0	2013	198	0.03	173.74
A211	A2	P	1997	-999	Welfia	regia	Arecaceae	2014	0	0	0	2014	198	0.03	173.74
A211	A2	P	1997	-999	Welfia	regia	Arecaceae	2015	0	0	0	2015	198	0.03	173.74
A211	A2	P	1997	-999	Welfia	regia	Arecaceae	2016	0	0	0	2016	198	0.03	173.74
A2110	A2	A	1997	-999	Pentaclethra	macroloba	Fabaceae	2013	5.84	0.0038	31.72	2013	411	0.13	985.54
A2110	A2	A	1997	-999	Pentaclethra	macroloba	Fabaceae	2014	4.73	0.00312	26.07	2014	417	0.14	1018.14
A2110	A2	A	1997	-999	Pentaclethra	macroloba	Fabaceae	2015	4.23	0.00282	23.61	2015	422	0.14	1045.7
A2110	A2	A	1997	-999	Pentaclethra	macroloba	Fabaceae	2016	5.78	0.00389	32.67	2016	426	0.14	1068.02
A2111	A2	A	1997	-999	Faramea	parvibractea	Rubiaceae	2013	0.97	0.00021	1.28	2013	135	0.01	62.3
A2111	A2	A	1997	-999	Faramea	parvibractea	Rubiaceae	2014	0	0	0	2014	136	0.01	63.61
A2111	A2	A	1997	-999	Faramea	parvibractea	Rubiaceae	2015	1.06	0.00023	1.4	2015	136	0.01	63.61
A2111	A2	A	1997	-999	Faramea	parvibractea	Rubiaceae	2016	0	0	0	2016	137	0.01	64.93
A2114	A2	A	1997	2017	Anaxagorea	crassipetala	Annonaceae	2013	0	0	0	2013	151	0.02	85.03
A2114	A2	A	1997	2017	Anaxagorea	crassipetala	Annonaceae	2014	0	0	0	2014	151	0.02	85.03
A2114	A2	A	1997	2017	Anaxagorea	crassipetala	Annonaceae	2015	0	0	0	2015	151	0.02	85.03
A2116	A2	A	1997	-999	Vochysia	ferruginea	Vochysiaceae	2013	20.39	0.01945	169.11	2013	597	0.28	2243.63
A2116	A2	A	1997	-999	Vochysia	ferruginea	Vochysiaceae	2014	21.81	0.02156	187.99	2014	618	0.3	2417.84
A2116	A2	A	1997	-999	Vochysia	ferruginea	Vochysiaceae	2015	20.1	0.02054	179.55	2015	641	0.32	2616.13
A2116	A2	A	1997	-999	Vochysia	ferruginea	Vochysiaceae	2016	26.75	0.02832	248.27	2016	660	0.34	2785.84
A2118	A2	A	1997	-999	Guarea	bullata	Meliaceae	2013	4.85	0.00154	11.17	2013	200	0.03	178.24
A2118	A2	A	1997	-999	Guarea	bullata	Meliaceae	2014	5.69	0.00186	13.56	2014	205	0.03	189.75
A2118	A2	A	1997	-999	Guarea	bullata	Meliaceae	2015	2.12	0.0007	5.17	2015	211	0.03	204.04
A2118	A2	A	1997	-999	Guarea	bullata	Meliaceae	2016	3.82	0.00129	9.5	2016	213	0.04	208.93
A2119	A2	A	1997	-999	Pterocarpus	sp. A	Fabaceae	2013	0	0	0	2013	314	0.08	532.58
A2119	A2	A	1997	-999	Pterocarpus	sp. A	Fabaceae	2014	0	0	0	2014	314	0.08	532.58
A2119	A2	A	1997	-999	Pterocarpus	sp. A	Fabaceae	2015	0	0	0	2015	314	0.08	532.58
A2119	A2	A	1997	-999	Pterocarpus	sp. A	Fabaceae	2016	0	0	0	2016	314	0.08	532.58
A212	A2	P	1997	-999	Welfia	regia	Arecaceae	2013	0	0	0	2013	134	0.01	61
A212	A2	P	1997	-999	Welfia	regia	Arecaceae	2014	0	0	0	2014	134	0.01	61
A212	A2	P	1997	-999	Welfia	regia	Arecaceae	2015	0	0	0	2015	134	0.01	61
A212	A2	P	1997	-999	Welfia	regia	Arecaceae	2016	0	0	0	2016	134	0.01	61
A2123	A2	P	1997	-999	Socratea	exorrhiza	Arecaceae	2013	0	0	0	2013	111	0.01	35.29
A2123	A2	P	1997	-999	Socratea	exorrhiza	Arecaceae	2014	0	0	0	2014	111	0.01	35.29
A2123	A2	P	1997	-999	Socratea	exorrhiza	Arecaceae	2015	0	0	0	2015	111	0.01	35.29
A2123	A2	P	1997	-999	Socratea	exorrhiza	Arecaceae	2016	0	0	0	2016	111	0.01	35.29
A2125	A2	P	1997	-999	Welfia	regia	Arecaceae	2013	0	0	0	2013	128	0.01	53.54
A2125	A2	P	1997	-999	Welfia	regia	Arecaceae	2014	0	0	0	2014	128	0.01	53.54
A2125	A2	P	1997	-999	Welfia	regia	Arecaceae	2015	0	0	0	2015	128	0.01	53.54
A2125	A2	P	1997	-999	Welfia	regia	Arecaceae	2016	0	0	0	2016	128	0.01	53.54
A2126	A2	P	1997	-999	Welfia	regia	Arecaceae	2013	0	0	0	2013	167	0.02	111.56
A2126	A2	P	1997	-999	Welfia	regia	Arecaceae	2014	0	0	0	2014	167	0.02	111.56
A2126	A2	P	1997	-999	Welfia	regia	Arecaceae	2015	0	0	0	2015	167	0.02	111.56
A2126	A2	P	1997	-999	Welfia	regia	Arecaceae	2016	0	0	0	2016	167	0.02	111.56
A2130	A2	A	1997	-999	Pentaclethra	macroloba	Fabaceae	2013	0.98	0.00075	6.35	2013	484	0.18	1418.27
A2130	A2	A	1997	-999	Pentaclethra	macroloba	Fabaceae	2014	3.79	0.0029	24.7	2014	485	0.18	1424.74
A2130	A2	A	1997	-999	Pentaclethra	macroloba	Fabaceae	2015	2.09	0.00161	13.71	2015	489	0.19	1450.79
A2130	A2	A	1997	-999	Pentaclethra	macroloba	Fabaceae	2016	4.83	0.00374	31.91	2016	491	0.19	1463.9
A2131	A2	A	1997	-999	Pentaclethra	macroloba	Fabaceae	2013	3.92	0.00276	23.24	2013	445	0.16	1177.27
A2131	A2	A	1997	-999	Pentaclethra	macroloba	Fabaceae	2014	6.64	0.00472	39.83	2014	449	0.16	1200.95
A2131	A2	A	1997	-999	Pentaclethra	macroloba	Fabaceae	2015	4.18	0.00301	25.45	2015	456	0.16	1242.97
A2131	A2	A	1997	-999	Pentaclethra	macroloba	Fabaceae	2016	5.79	0.00421	35.67	2016	460	0.17	1267.3
A2135	A2	A	1997	-999	Casearia	arborea	Salicaceae	2013	0.98	0.00032	2.37	2013	210	0.03	201.62
A2135	A2	A	1997	-999	Casearia	arborea	Salicaceae	2014	0	0	0	2014	211	0.03	204.04
A2135	A2	A	1997	-999	Casearia	arborea	Salicaceae	2015	0	0	0	2015	211	0.03	204.04
A2135	A2	A	1997	-999	Casearia	arborea	Salicaceae	2016	0	0	0	2016	211	0.03	204.04
A2136	A2	A	1997	-999	Inga	pezizifera	Fabaceae	2013	4.91	0.00291	24	2013	375	0.11	801.18
A2136	A2	A	1997	-999	Inga	pezizifera	Fabaceae	2014	1.89	0.00113	9.35	2014	380	0.11	825.64
A2136	A2	A	1997	-999	Inga	pezizifera	Fabaceae	2015	2.1	0.00126	10.43	2015	382	0.11	835.53
A2136	A2	A	1997	-999	Inga	pezizifera	Fabaceae	2016	2.9	0.00175	14.51	2016	384	0.12	845.48
A2140	A2	P	1997	2016	Welfia	regia	Arecaceae	2013	0	0	0	2013	172	0.02	120.63
A2140	A2	P	1997	2016	Welfia	regia	Arecaceae	2014	0	0	0	2014	172	0.02	120.63
A2141	A2	P	1997	2015	Welfia	regia	Arecaceae	2013	0	0	0	2013	152	0.02	86.58
A2142	A2	P	1997	-999	Welfia	regia	Arecaceae	2013	0	0	0	2013	150	0.02	83.5
A2142	A2	P	1997	-999	Welfia	regia	Arecaceae	2014	0	0	0	2014	150	0.02	83.5
A2142	A2	P	1997	-999	Welfia	regia	Arecaceae	2015	0	0	0	2015	150	0.02	83.5
A2142	A2	P	1997	-999	Welfia	regia	Arecaceae	2016	0	0	0	2016	150	0.02	83.5
A2144	A2	A	1997	-999	Preslianthus	pittieri	Capparaceae	2013	0	0	0	2013	109	0.01	33.43
A2144	A2	A	1997	-999	Preslianthus	pittieri	Capparaceae	2014	0.95	0.00016	0.87	2014	109	0.01	33.43
A2144	A2	A	1997	-999	Preslianthus	pittieri	Capparaceae	2015	1.05	0.00018	0.99	2015	110	0.01	34.35
A2144	A2	A	1997	-999	Preslianthus	pittieri	Capparaceae	2016	0.97	0.00017	0.92	2016	111	0.01	35.29
A2145	A2	A	1997	-999	Sacoglottis	trichogyna	Humiriaceae	2013	4.91	0.0012	7.88	2013	153	0.02	88.14
A2145	A2	A	1997	-999	Sacoglottis	trichogyna	Humiriaceae	2014	2.84	0.00071	4.72	2014	158	0.02	96.17
A2145	A2	A	1997	-999	Sacoglottis	trichogyna	Humiriaceae	2015	4.2	0.00107	7.2	2015	161	0.02	101.17
A2145	A2	A	1997	-999	Sacoglottis	trichogyna	Humiriaceae	2016	5.79	0.00153	10.38	2016	165	0.02	108.04
A2146	A2	P	1997	-999	Iriartea	deltoidea	Arecaceae	2013	0	0	0	2013	195	0.03	167.1
A2146	A2	P	1997	-999	Iriartea	deltoidea	Arecaceae	2014	0.95	0.00029	2.08	2014	195	0.03	167.1
A2146	A2	P	1997	-999	Iriartea	deltoidea	Arecaceae	2015	0	0	0	2015	196	0.03	169.3
A2146	A2	P	1997	-999	Iriartea	deltoidea	Arecaceae	2016	0	0	0	2016	196	0.03	169.3
A2147	A2	A	1997	-999	Rauvolfia	purpurascens	Apocynaceae	2013	1.96	0.00065	4.76	2013	210	0.03	201.62
A2147	A2	A	1997	-999	Rauvolfia	purpurascens	Apocynaceae	2014	2.84	0.00095	6.99	2014	212	0.04	206.48
A2147	A2	A	1997	-999	Rauvolfia	purpurascens	Apocynaceae	2015	0	0	0	2015	215	0.04	213.87
A2147	A2	A	1997	-999	Rauvolfia	purpurascens	Apocynaceae	2016	2.9	0.00099	7.27	2016	215	0.04	213.87
A215	A2	P	1997	-999	Socratea	exorrhiza	Arecaceae	2013	0	0	0	2013	133	0.01	59.72
A215	A2	P	1997	-999	Socratea	exorrhiza	Arecaceae	2014	0	0	0	2014	133	0.01	59.72
A215	A2	P	1997	-999	Socratea	exorrhiza	Arecaceae	2015	0	0	0	2015	133	0.01	59.72
A215	A2	P	1997	-999	Socratea	exorrhiza	Arecaceae	2016	0	0	0	2016	133	0.01	59.72
A2150	A2	P	1997	-999	Welfia	regia	Arecaceae	2013	0	0	0	2013	193	0.03	162.75
A2150	A2	P	1997	-999	Welfia	regia	Arecaceae	2014	0	0	0	2014	193	0.03	162.75
A2150	A2	P	1997	-999	Welfia	regia	Arecaceae	2015	0	0	0	2015	193	0.03	162.75
A2150	A2	P	1997	-999	Welfia	regia	Arecaceae	2016	0	0	0	2016	193	0.03	162.75
A2151	A2	A	1997	-999	Siparuna	cuspidata	Siparunaceae	2013	0.98	0.00017	0.89	2013	108	0.01	32.52
A2151	A2	A	1997	-999	Siparuna	cuspidata	Siparunaceae	2014	0	0	0	2014	109	0.01	33.43
A2151	A2	A	1997	-999	Siparuna	cuspidata	Siparunaceae	2015	1.05	0.00018	0.97	2015	109	0.01	33.43
A2151	A2	A	1997	-999	Siparuna	cuspidata	Siparunaceae	2016	0.97	0.00017	0.91	2016	110	0.01	34.35
A2152	A2	A	1997	-999	Xylopia	sericophylla	Annonaceae	2013	11.77	0.00662	54.2	2013	352	0.1	693.44
A2152	A2	A	1997	-999	Xylopia	sericophylla	Annonaceae	2014	8.51	0.00493	40.5	2014	364	0.1	748.68
A2152	A2	A	1997	-999	Xylopia	sericophylla	Annonaceae	2015	13.64	0.00813	67.1	2015	373	0.11	791.5
A2152	A2	A	1997	-999	Xylopia	sericophylla	Annonaceae	2016	7.72	0.00473	39.22	2016	386	0.12	855.48
A2155	A2	A	1997	-999	Laetia	procera	Salicaceae	2013	4.91	0.00422	36.34	2013	545	0.23	1840.34
A2155	A2	A	1997	-999	Laetia	procera	Salicaceae	2014	2.84	0.00246	21.18	2014	550	0.24	1877.38
A2155	A2	A	1997	-999	Laetia	procera	Salicaceae	2015	6.29	0.0055	47.41	2015	553	0.24	1899.78
A2155	A2	A	1997	-999	Laetia	procera	Salicaceae	2016	6.76	0.00597	51.57	2016	559	0.25	1944.98
A2156	A2	A	1997	-999	Preslianthus	pittieri	Capparaceae	2013	0	0	0	2013	141	0.02	70.38
A2156	A2	A	1997	-999	Preslianthus	pittieri	Capparaceae	2014	0	0	0	2014	141	0.02	70.38
A2156	A2	A	1997	-999	Preslianthus	pittieri	Capparaceae	2015	0	0	0	2015	141	0.02	70.38
A2156	A2	A	1997	-999	Preslianthus	pittieri	Capparaceae	2016	0	0	0	2016	141	0.02	70.38
A216	A2	A	1997	-999	Protium	panamense	Burseraceae	2013	3.89	0.00153	11.7	2013	248	0.05	303.99
A216	A2	A	1997	-999	Protium	panamense	Burseraceae	2014	4.73	0.00189	14.52	2014	252	0.05	316.01
A216	A2	A	1997	-999	Protium	panamense	Burseraceae	2015	5.29	0.00216	16.64	2015	257	0.05	331.37
A216	A2	A	1997	-999	Protium	panamense	Burseraceae	2016	5.78	0.00241	18.65	2016	262	0.05	347.09
A2160	A2	A	1997	2017	Virola	sebifera	Myristicaceae	2013	1.96	0.00154	13.13	2013	498	0.19	1510.27
A2160	A2	A	1997	2017	Virola	sebifera	Myristicaceae	2014	1.89	0.00148	12.68	2014	500	0.2	1523.65
A2160	A2	A	1997	2017	Virola	sebifera	Myristicaceae	2015	1.05	0.00083	7.09	2015	502	0.2	1537.09
A2163	A2	A	1997	-999	Inga	densiflora	Fabaceae	2013	0.98	0.00049	3.96	2013	319	0.08	552.53
A2163	A2	A	1997	-999	Inga	densiflora	Fabaceae	2014	0.95	0.00048	3.83	2014	320	0.08	556.56
A2163	A2	A	1997	-999	Inga	densiflora	Fabaceae	2015	2.1	0.00106	8.54	2015	321	0.08	560.61
A2163	A2	A	1997	-999	Inga	densiflora	Fabaceae	2016	2.9	0.00148	11.9	2016	323	0.08	568.75
A2166	A2	A	1997	-999	Laetia	procera	Salicaceae	2013	7.85	0.00387	31.02	2013	310	0.08	516.89
A2166	A2	A	1997	-999	Laetia	procera	Salicaceae	2014	9.46	0.0048	38.63	2014	318	0.08	548.51
A2166	A2	A	1997	-999	Laetia	procera	Salicaceae	2015	10.49	0.00549	44.4	2015	328	0.08	589.36
A2166	A2	A	1997	-999	Laetia	procera	Salicaceae	2016	8.69	0.00468	38.01	2016	338	0.09	631.69
A217	A2	A	1997	-999	Quararibea	bracteolosa	Malvaceae	2013	0.97	0.00037	2.79	2013	240	0.05	280.67
A217	A2	A	1997	-999	Quararibea	bracteolosa	Malvaceae	2014	0	0	0	2014	241	0.05	283.53
A217	A2	A	1997	-999	Quararibea	bracteolosa	Malvaceae	2015	2.12	0.0008	6.11	2015	241	0.05	283.53
A217	A2	A	1997	-999	Quararibea	bracteolosa	Malvaceae	2016	2.89	0.00111	8.45	2016	243	0.05	289.3
A2171	A2	A	1997	2017	Pourouma	bicolor	Urticaceae	2013	2.94	0.0009	6.43	2013	193	0.03	162.75
A2171	A2	A	1997	2017	Pourouma	bicolor	Urticaceae	2014	0	0	0	2014	196	0.03	169.3
A2171	A2	A	1997	2017	Pourouma	bicolor	Urticaceae	2015	0	0	0	2015	196	0.03	169.3
A2173	A2	A	1997	-999	Parathesis	trichogyne	Primulaceae	2013	3.92	0.0015	11.39	2013	241	0.05	283.53
A2173	A2	A	1997	-999	Parathesis	trichogyne	Primulaceae	2014	4.73	0.00184	14.03	2014	245	0.05	295.13
A2173	A2	A	1997	-999	Parathesis	trichogyne	Primulaceae	2015	3.15	0.00124	9.52	2015	250	0.05	309.97
A2173	A2	A	1997	-999	Parathesis	trichogyne	Primulaceae	2016	2.9	0.00116	8.9	2016	253	0.05	319.05
A2174	A2	A	1997	-999	Hieronyma	oblonga	Phyllanthaceae	2013	4.91	0.00148	10.57	2013	190	0.03	156.33
A2174	A2	A	1997	-999	Hieronyma	oblonga	Phyllanthaceae	2014	2.84	0.00088	6.28	2014	195	0.03	167.1
A2174	A2	A	1997	-999	Hieronyma	oblonga	Phyllanthaceae	2015	3.15	0.00099	7.1	2015	198	0.03	173.74
A2174	A2	A	1997	-999	Hieronyma	oblonga	Phyllanthaceae	2016	1.93	0.00061	4.43	2016	201	0.03	180.51
A2176	A2	A	1997	-999	Anaxagorea	crassipetala	Annonaceae	2013	0	0	0	2013	107	0.01	31.62
A2176	A2	A	1997	-999	Anaxagorea	crassipetala	Annonaceae	2014	0	0	0	2014	107	0.01	31.62
A2176	A2	A	1997	-999	Anaxagorea	crassipetala	Annonaceae	2015	0	0	0	2015	107	0.01	31.62
A2176	A2	A	1997	-999	Anaxagorea	crassipetala	Annonaceae	2016	0	0	0	2016	107	0.01	31.62
A2177	A2	A	1997	-999	Handroanthus	chrysanthus	Bignoniaceae	2013	0	0	0	2013	100	0.01	25.77
A2177	A2	A	1997	-999	Handroanthus	chrysanthus	Bignoniaceae	2014	0	0	0	2014	100	0.01	25.77
A2177	A2	A	1997	-999	Handroanthus	chrysanthus	Bignoniaceae	2015	0	0	0	2015	100	0.01	25.77
A2177	A2	A	1997	-999	Handroanthus	chrysanthus	Bignoniaceae	2016	0	0	0	2016	100	0.01	25.77
A2178	A2	P	1997	-999	Welfia	regia	Arecaceae	2013	0	0	0	2013	153	0.02	88.14
A2178	A2	P	1997	-999	Welfia	regia	Arecaceae	2014	0	0	0	2014	153	0.02	88.14
A2178	A2	P	1997	-999	Welfia	regia	Arecaceae	2015	0	0	0	2015	153	0.02	88.14
A2178	A2	P	1997	-999	Welfia	regia	Arecaceae	2016	0	0	0	2016	153	0.02	88.14
A2179	A2	A	1997	-999	Licaria	sarapiquensis	Lauraceae	2013	0.98	0.00038	2.9	2013	246	0.05	298.07
A2179	A2	A	1997	-999	Licaria	sarapiquensis	Lauraceae	2014	0.95	0.00037	2.81	2014	247	0.05	301.02
A2179	A2	A	1997	-999	Licaria	sarapiquensis	Lauraceae	2015	0	0	0	2015	248	0.05	303.99
A2179	A2	A	1997	-999	Licaria	sarapiquensis	Lauraceae	2016	0.97	0.00038	2.88	2016	248	0.05	303.99
A218	A2	P	1997	-999	Welfia	regia	Arecaceae	2013	0	0	0	2013	157	0.02	94.54
A218	A2	P	1997	-999	Welfia	regia	Arecaceae	2014	0	0	0	2014	157	0.02	94.54
A218	A2	P	1997	-999	Welfia	regia	Arecaceae	2015	0	0	0	2015	157	0.02	94.54
A218	A2	P	1997	-999	Welfia	regia	Arecaceae	2016	0	0	0	2016	157	0.02	94.54
A2181	A2	A	1997	-999	Faramea	parvibractea	Rubiaceae	2013	0	0	0	2013	108	0.01	32.52
A2181	A2	A	1997	-999	Faramea	parvibractea	Rubiaceae	2014	0	0	0	2014	108	0.01	32.52
A2181	A2	A	1997	-999	Faramea	parvibractea	Rubiaceae	2015	0	0	0	2015	108	0.01	32.52
A2181	A2	A	1997	-999	Faramea	parvibractea	Rubiaceae	2016	0	0	0	2016	108	0.01	32.52
A2182	A2	A	1997	-999	Protium	panamense	Burseraceae	2013	0.98	0.0005	4.02	2013	323	0.08	568.75
A2182	A2	A	1997	-999	Protium	panamense	Burseraceae	2014	0.95	0.00048	3.88	2014	324	0.08	572.84
A2182	A2	A	1997	-999	Protium	panamense	Burseraceae	2015	1.05	0.00054	4.32	2015	325	0.08	576.95
A2182	A2	A	1997	-999	Protium	panamense	Burseraceae	2016	1.93	0.00099	8	2016	326	0.08	581.07
A2183	A2	A	1997	-999	Pentaclethra	macroloba	Fabaceae	2013	0.98	0.00072	6.09	2013	466	0.17	1304.24
A2183	A2	A	1997	-999	Pentaclethra	macroloba	Fabaceae	2014	0.95	0.00069	5.89	2014	467	0.17	1310.45
A2183	A2	A	1997	-999	Pentaclethra	macroloba	Fabaceae	2015	0	0	0	2015	468	0.17	1316.67
A2183	A2	A	1997	-999	Pentaclethra	macroloba	Fabaceae	2016	2.9	0.00214	18.11	2016	468	0.17	1316.67
A2184	A2	A	1997	-999	Laetia	procera	Salicaceae	2013	3.92	0.00232	19.11	2013	374	0.11	796.34
A2184	A2	A	1997	-999	Laetia	procera	Salicaceae	2014	1.89	0.00113	9.29	2014	378	0.11	815.82
A2184	A2	A	1997	-999	Laetia	procera	Salicaceae	2015	4.2	0.00252	20.8	2015	380	0.11	825.64
A2184	A2	A	1997	-999	Laetia	procera	Salicaceae	2016	5.79	0.00352	29.16	2016	384	0.12	845.48
A2185	A2	P	1997	-999	Socratea	exorrhiza	Arecaceae	2013	0	0	0	2013	134	0.01	61
A2185	A2	P	1997	-999	Socratea	exorrhiza	Arecaceae	2014	0	0	0	2014	134	0.01	61
A2185	A2	P	1997	-999	Socratea	exorrhiza	Arecaceae	2015	0	0	0	2015	134	0.01	61
A2185	A2	P	1997	-999	Socratea	exorrhiza	Arecaceae	2016	0	0	0	2016	134	0.01	61
A2186	A2	A	1997	-999	Meliosma	donnellsmithii	Sabiaceae	2013	0	0	0	2013	102	0.01	27.37
A2186	A2	A	1997	-999	Meliosma	donnellsmithii	Sabiaceae	2014	0	0	0	2014	102	0.01	27.37
A2186	A2	A	1997	-999	Meliosma	donnellsmithii	Sabiaceae	2015	0	0	0	2015	102	0.01	27.37
A2186	A2	A	1997	-999	Meliosma	donnellsmithii	Sabiaceae	2016	0	0	0	2016	102	0.01	27.37
A2189	A2	A	1997	-999	Byrsonima	arthropoda	Malpighiaceae	2013	3.92	0.0019	15.16	2013	306	0.07	501.44
A2189	A2	A	1997	-999	Byrsonima	arthropoda	Malpighiaceae	2014	5.67	0.00279	22.34	2014	310	0.08	516.89
A2189	A2	A	1997	-999	Byrsonima	arthropoda	Malpighiaceae	2015	5.24	0.00262	21.07	2015	316	0.08	540.52
A2189	A2	A	1997	-999	Byrsonima	arthropoda	Malpighiaceae	2016	2.9	0.00147	11.81	2016	321	0.08	560.61
A219	A2	A	1997	2017	Trichilia	septentrionalis	Meliaceae	2013	0	0	0	2013	270	0.06	373.03
A219	A2	A	1997	2017	Trichilia	septentrionalis	Meliaceae	2014	0.95	0.0004	3.13	2014	270	0.06	373.03
A219	A2	A	1997	2017	Trichilia	septentrionalis	Meliaceae	2015	0	0	0	2015	271	0.06	376.33
A2190	A2	A	1997	-999	Inga	densiflora	Fabaceae	2013	0.98	0.00034	2.53	2013	221	0.04	229.06
A2190	A2	A	1997	-999	Inga	densiflora	Fabaceae	2014	0.94	0.00033	2.45	2014	222	0.04	231.64
A2190	A2	A	1997	-999	Inga	densiflora	Fabaceae	2015	2.1	0.00074	5.51	2015	223	0.04	234.24
A2190	A2	A	1997	-999	Inga	densiflora	Fabaceae	2016	2.9	0.00103	7.7	2016	225	0.04	239.48
A2191	A2	P	1997	-999	Welfia	regia	Arecaceae	2013	0	0	0	2013	142	0.02	71.78
A2191	A2	P	1997	-999	Welfia	regia	Arecaceae	2014	0	0	0	2014	142	0.02	71.78
A2191	A2	P	1997	-999	Welfia	regia	Arecaceae	2015	0	0	0	2015	142	0.02	71.78
A2191	A2	P	1997	-999	Welfia	regia	Arecaceae	2016	0	0	0	2016	142	0.02	71.78
A2192	A2	A	1997	-999	Quararibea	bracteolosa	Malvaceae	2013	1.96	0.00036	2.06	2013	117	0.01	41.25
A2192	A2	A	1997	-999	Quararibea	bracteolosa	Malvaceae	2014	0	0	0	2014	119	0.01	43.35
A2192	A2	A	1997	-999	Quararibea	bracteolosa	Malvaceae	2015	1.05	0.0002	1.13	2015	119	0.01	43.35
A2192	A2	A	1997	-999	Quararibea	bracteolosa	Malvaceae	2016	0	0	0	2016	120	0.01	44.42
A2193	A2	A	1997	-999	Rauvolfia	purpurascens	Apocynaceae	2013	0.98	0.00023	1.52	2013	151	0.02	85.03
A2193	A2	A	1997	-999	Rauvolfia	purpurascens	Apocynaceae	2014	1.89	0.00045	2.97	2014	152	0.02	86.58
A2193	A2	A	1997	-999	Rauvolfia	purpurascens	Apocynaceae	2015	0	0	0	2015	154	0.02	89.72
A2193	A2	A	1997	-999	Rauvolfia	purpurascens	Apocynaceae	2016	0.97	0.00023	1.54	2016	154	0.02	89.72
A2194	A2	P	1997	-999	Socratea	exorrhiza	Arecaceae	2013	0	0	0	2013	127	0.01	52.35
A2194	A2	P	1997	-999	Socratea	exorrhiza	Arecaceae	2014	0	0	0	2014	127	0.01	52.35
A2194	A2	P	1997	-999	Socratea	exorrhiza	Arecaceae	2015	0	0	0	2015	127	0.01	52.35
A2194	A2	P	1997	-999	Socratea	exorrhiza	Arecaceae	2016	0	0	0	2016	127	0.01	52.35
A2195	A2	A	1997	-999	Minquartia	guianensis	Coulaceae	2013	7.85	0.00333	25.91	2013	266	0.06	359.94
A2195	A2	A	1997	-999	Minquartia	guianensis	Coulaceae	2014	7.56	0.0033	25.86	2014	274	0.06	386.35
A2195	A2	A	1997	-999	Minquartia	guianensis	Coulaceae	2015	6.29	0.00282	22.17	2015	282	0.06	413.7
A2195	A2	A	1997	-999	Minquartia	guianensis	Coulaceae	2016	6.76	0.00309	24.46	2016	288	0.07	434.84
A2197	A2	A	1997	-999	Guatteria	amplifolia	Annonaceae	2013	0.98	0.00023	1.47	2013	148	0.02	80.48
A2197	A2	A	1997	-999	Guatteria	amplifolia	Annonaceae	2014	0	0	0	2014	149	0.02	81.98
A2197	A2	A	1997	-999	Guatteria	amplifolia	Annonaceae	2015	0	0	0	2015	149	0.02	81.98
A2197	A2	A	1997	-999	Guatteria	amplifolia	Annonaceae	2016	0	0	0	2016	149	0.02	81.98
A2198	A2	A	1997	-999	Sacoglottis	trichogyna	Humiriaceae	2013	10.79	0.00367	27.08	2013	211	0.03	204.04
A2198	A2	A	1997	-999	Sacoglottis	trichogyna	Humiriaceae	2014	10.4	0.00372	27.79	2014	222	0.04	231.64
A2198	A2	A	1997	-999	Sacoglottis	trichogyna	Humiriaceae	2015	10.49	0.00392	29.65	2015	233	0.04	261.03
A2198	A2	A	1997	-999	Sacoglottis	trichogyna	Humiriaceae	2016	6.76	0.00262	19.96	2016	243	0.05	289.3
A2199	A2	A	1997	-999	Protium	confusum	Burseraceae	2013	0.98	0.00021	1.33	2013	138	0.01	66.27
A2199	A2	A	1997	-999	Protium	confusum	Burseraceae	2014	3.78	0.00084	5.26	2014	139	0.02	67.63
A2199	A2	A	1997	-999	Protium	confusum	Burseraceae	2015	3.15	0.00071	4.54	2015	143	0.02	73.19
A2199	A2	A	1997	-999	Protium	confusum	Burseraceae	2016	1.93	0.00045	2.86	2016	146	0.02	77.52
A22	A2	P	1997	-999	Welfia	regia	Arecaceae	2013	0	0	0	2013	162	0.02	102.86
A22	A2	P	1997	-999	Welfia	regia	Arecaceae	2014	0	0	0	2014	162	0.02	102.86
A22	A2	P	1997	-999	Welfia	regia	Arecaceae	2015	0	0	0	2015	162	0.02	102.86
A22	A2	P	1997	-999	Welfia	regia	Arecaceae	2016	0	0	0	2016	162	0.02	102.86
A220	A2	A	1997	-999	Pterocarpus	sp. A	Fabaceae	2013	0	0	0	2013	204	0.03	187.41
A220	A2	A	1997	-999	Pterocarpus	sp. A	Fabaceae	2014	1.89	0.00061	4.42	2014	204	0.03	187.41
A220	A2	A	1997	-999	Pterocarpus	sp. A	Fabaceae	2015	0	0	0	2015	206	0.03	192.09
A220	A2	A	1997	-999	Pterocarpus	sp. A	Fabaceae	2016	0.96	0.00031	2.27	2016	206	0.03	192.09
A2201	A2	A	1997	-999	Pentaclethra	macroloba	Fabaceae	2013	9.81	0.00922	80.02	2013	593	0.28	2211.19
A2201	A2	A	1997	-999	Pentaclethra	macroloba	Fabaceae	2014	10.4	0.00994	86.44	2014	603	0.29	2292.74
A2201	A2	A	1997	-999	Pentaclethra	macroloba	Fabaceae	2015	8.39	0.00815	70.91	2015	614	0.3	2384.15
A2201	A2	A	1997	-999	Pentaclethra	macroloba	Fabaceae	2016	7.72	0.0076	66.2	2016	622	0.3	2451.76
A2203	A2	A	1997	-999	Licaria	sarapiquensis	Lauraceae	2013	0.98	0.00026	1.81	2013	171	0.02	118.78
A2203	A2	A	1997	-999	Licaria	sarapiquensis	Lauraceae	2014	0.95	0.00026	1.76	2014	172	0.02	120.63
A2203	A2	A	1997	-999	Licaria	sarapiquensis	Lauraceae	2015	0	0	0	2015	173	0.02	122.48
A2203	A2	A	1997	-999	Licaria	sarapiquensis	Lauraceae	2016	0.97	0.00026	1.81	2016	173	0.02	122.48
A2204	A2	A	1997	-999	Protium	confusum	Burseraceae	2013	0	0	0	2013	184	0.03	143.9
A2204	A2	A	1997	-999	Protium	confusum	Burseraceae	2014	0	0	0	2014	184	0.03	143.9
A2204	A2	A	1997	-999	Protium	confusum	Burseraceae	2015	1.05	0.0003	2.13	2015	184	0.03	143.9
A2204	A2	A	1997	-999	Protium	confusum	Burseraceae	2016	0	0	0	2016	185	0.03	145.93
A2205	A2	P	1997	-999	Welfia	regia	Arecaceae	2013	0	0	0	2013	123	0.01	47.73
A2205	A2	P	1997	-999	Welfia	regia	Arecaceae	2014	0	0	0	2014	123	0.01	47.73
A2205	A2	P	1997	-999	Welfia	regia	Arecaceae	2015	0	0	0	2015	123	0.01	47.73
A2205	A2	P	1997	-999	Welfia	regia	Arecaceae	2016	0	0	0	2016	123	0.01	47.73
A2206	A2	P	1997	-999	Socratea	exorrhiza	Arecaceae	2013	0	0	0	2013	158	0.02	96.17
A2206	A2	P	1997	-999	Socratea	exorrhiza	Arecaceae	2014	0	0	0	2014	158	0.02	96.17
A2206	A2	P	1997	-999	Socratea	exorrhiza	Arecaceae	2015	0	0	0	2015	158	0.02	96.17
A2206	A2	P	1997	-999	Socratea	exorrhiza	Arecaceae	2016	0	0	0	2016	158	0.02	96.17
A2209	A2	A	1997	2015	Swartzia	nicaraguensis	Fabaceae	2013	0	0	0	2013	258	0.05	334.48
A2210	A2	A	1997	-999	Pentaclethra	macroloba	Fabaceae	2013	0.98	0.00079	6.73	2013	510	0.2	1591.43
A2210	A2	A	1997	-999	Pentaclethra	macroloba	Fabaceae	2014	1.89	0.00152	13.02	2014	511	0.21	1598.29
A2210	A2	A	1997	-999	Pentaclethra	macroloba	Fabaceae	2015	2.1	0.00169	14.5	2015	513	0.21	1612.06
A2210	A2	A	1997	-999	Pentaclethra	macroloba	Fabaceae	2016	2.9	0.00235	20.13	2016	515	0.21	1625.88
A2213	A2	A	1997	-999	Miconia	stevensiana	Melastomataceae	2013	0	0	0	2013	108	0.01	32.52
A2213	A2	A	1997	-999	Miconia	stevensiana	Melastomataceae	2014	0	0	0	2014	108	0.01	32.52
A2213	A2	A	1997	-999	Miconia	stevensiana	Melastomataceae	2015	0	0	0	2015	108	0.01	32.52
A2213	A2	A	1997	-999	Miconia	stevensiana	Melastomataceae	2016	0	0	0	2016	108	0.01	32.52
A2215	A2	A	1997	-999	Faramea	parvibractea	Rubiaceae	2013	0	0	0	2013	175	0.02	126.24
A2215	A2	A	1997	-999	Faramea	parvibractea	Rubiaceae	2014	1.89	0.00052	3.61	2014	175	0.02	126.24
A2215	A2	A	1997	-999	Faramea	parvibractea	Rubiaceae	2015	0	0	0	2015	177	0.02	130.06
A2215	A2	A	1997	-999	Faramea	parvibractea	Rubiaceae	2016	0.97	0.00027	1.87	2016	177	0.02	130.06
A2216	A2	P	1997	-999	Socratea	exorrhiza	Arecaceae	2013	0	0	0	2013	125	0.01	50.01
A2216	A2	P	1997	-999	Socratea	exorrhiza	Arecaceae	2014	0	0	0	2014	125	0.01	50.01
A2216	A2	P	1997	-999	Socratea	exorrhiza	Arecaceae	2015	0	0	0	2015	125	0.01	50.01
A2216	A2	P	1997	-999	Socratea	exorrhiza	Arecaceae	2016	0	0	0	2016	125	0.01	50.01
A2217	A2	A	1997	-999	Cinnamomum	chavarrianum	Lauraceae	2013	0.98	0.00032	2.29	2013	204	0.03	187.41
A2217	A2	A	1997	-999	Cinnamomum	chavarrianum	Lauraceae	2014	1.89	0.00061	4.45	2014	205	0.03	189.75
A2217	A2	A	1997	-999	Cinnamomum	chavarrianum	Lauraceae	2015	1.05	0.00034	2.49	2015	207	0.03	194.45
A2217	A2	A	1997	-999	Cinnamomum	chavarrianum	Lauraceae	2016	0.97	0.00032	2.31	2016	208	0.03	196.83
A2218	A2	P	1997	2016	Socratea	exorrhiza	Arecaceae	2013	0	0	0	2013	126	0.01	51.17
A2218	A2	P	1997	2016	Socratea	exorrhiza	Arecaceae	2014	0	0	0	2014	126	0.01	51.17
A2221	A2	A	1997	-999	Protium	pittieri	Burseraceae	2013	8.83	0.00342	26.08	2013	242	0.05	286.41
A2221	A2	A	1997	-999	Protium	pittieri	Burseraceae	2014	6.62	0.00265	20.33	2014	251	0.05	312.98
A2221	A2	A	1997	-999	Protium	pittieri	Burseraceae	2015	3.15	0.00128	9.9	2015	258	0.05	334.48
A2221	A2	A	1997	-999	Protium	pittieri	Burseraceae	2016	3.86	0.0016	12.35	2016	261	0.05	343.92
A2222	A2	A	1997	-999	Ormosia	velutina	Fabaceae	2013	0	0	0	2013	334	0.09	614.58
A2222	A2	A	1997	-999	Ormosia	velutina	Fabaceae	2014	0.95	0.0005	4.02	2014	334	0.09	614.58
A2222	A2	A	1997	-999	Ormosia	velutina	Fabaceae	2015	0	0	0	2015	335	0.09	618.84
A2222	A2	A	1997	-999	Ormosia	velutina	Fabaceae	2016	0	0	0	2016	335	0.09	618.84
A2223	A2	P	1997	-999	Socratea	exorrhiza	Arecaceae	2013	0	0	0	2013	136	0.01	63.61
A2223	A2	P	1997	-999	Socratea	exorrhiza	Arecaceae	2014	0	0	0	2014	136	0.01	63.61
A2223	A2	P	1997	-999	Socratea	exorrhiza	Arecaceae	2015	0	0	0	2015	136	0.01	63.61
A2223	A2	P	1997	-999	Socratea	exorrhiza	Arecaceae	2016	0	0	0	2016	136	0.01	63.61
A2224	A2	P	1997	-999	Socratea	exorrhiza	Arecaceae	2013	0	0	0	2013	124	0.01	48.86
A2224	A2	P	1997	-999	Socratea	exorrhiza	Arecaceae	2014	0	0	0	2014	124	0.01	48.86
A2224	A2	P	1997	-999	Socratea	exorrhiza	Arecaceae	2015	0	0	0	2015	124	0.01	48.86
A2224	A2	P	1997	-999	Socratea	exorrhiza	Arecaceae	2016	0	0	0	2016	124	0.01	48.86
A2225	A2	P	1997	-999	Socratea	exorrhiza	Arecaceae	2013	0	0	0	2013	127	0.01	52.35
A2225	A2	P	1997	-999	Socratea	exorrhiza	Arecaceae	2014	0	0	0	2014	127	0.01	52.35
A2225	A2	P	1997	-999	Socratea	exorrhiza	Arecaceae	2015	0	0	0	2015	127	0.01	52.35
A2225	A2	P	1997	-999	Socratea	exorrhiza	Arecaceae	2016	0	0	0	2016	127	0.01	52.35
A2226	A2	P	1997	-999	Socratea	exorrhiza	Arecaceae	2013	0	0	0	2013	145	0.02	76.06
A2226	A2	P	1997	-999	Socratea	exorrhiza	Arecaceae	2014	0	0	0	2014	145	0.02	76.06
A2226	A2	P	1997	-999	Socratea	exorrhiza	Arecaceae	2015	0	0	0	2015	145	0.02	76.06
A2226	A2	P	1997	-999	Socratea	exorrhiza	Arecaceae	2016	0	0	0	2016	145	0.02	76.06
A2227	A2	P	1997	-999	Socratea	exorrhiza	Arecaceae	2013	0	0	0	2013	121	0.01	45.51
A2227	A2	P	1997	-999	Socratea	exorrhiza	Arecaceae	2014	0	0	0	2014	121	0.01	45.51
A2227	A2	P	1997	-999	Socratea	exorrhiza	Arecaceae	2015	0	0	0	2015	121	0.01	45.51
A2227	A2	P	1997	-999	Socratea	exorrhiza	Arecaceae	2016	0	0	0	2016	121	0.01	45.51
A2229	A2	A	1997	-999	Hieronyma	oblonga	Phyllanthaceae	2013	1.96	0.00131	10.98	2013	424	0.14	1056.83
A2229	A2	A	1997	-999	Hieronyma	oblonga	Phyllanthaceae	2014	0	0	0	2014	426	0.14	1068.02
A2229	A2	A	1997	-999	Hieronyma	oblonga	Phyllanthaceae	2015	0	0	0	2015	426	0.14	1068.02
A2229	A2	A	1997	-999	Hieronyma	oblonga	Phyllanthaceae	2016	0	0	0	2016	426	0.14	1068.02
A223	A2	A	1997	-999	Dendropanax	arboreus	Araliaceae	2013	1.95	0.00114	9.42	2013	373	0.11	791.5
A223	A2	A	1997	-999	Dendropanax	arboreus	Araliaceae	2014	0	0	0	2014	375	0.11	801.18
A223	A2	A	1997	-999	Dendropanax	arboreus	Araliaceae	2015	1.06	0.00062	5.14	2015	375	0.11	801.18
A223	A2	A	1997	-999	Dendropanax	arboreus	Araliaceae	2016	1.93	0.00114	9.41	2016	376	0.11	806.05
A2231	A2	A	1997	-999	Inga	alba	Fabaceae	2013	18.64	0.01243	104.16	2013	415	0.14	1007.21
A2231	A2	A	1997	-999	Inga	alba	Fabaceae	2014	8.51	0.00586	49.31	2014	434	0.15	1113.37
A2231	A2	A	1997	-999	Inga	alba	Fabaceae	2015	17.83	0.01265	106.75	2015	443	0.15	1165.52
A2231	A2	A	1997	-999	Inga	alba	Fabaceae	2016	25.11	0.01865	158.29	2016	460	0.17	1267.3
A2232	A2	A	1997	-999	Faramea	parvibractea	Rubiaceae	2013	0	0	0	2013	127	0.01	52.35
A2232	A2	A	1997	-999	Faramea	parvibractea	Rubiaceae	2014	0	0	0	2014	127	0.01	52.35
A2232	A2	A	1997	-999	Faramea	parvibractea	Rubiaceae	2015	1.05	0.00021	1.25	2015	127	0.01	52.35
A2232	A2	A	1997	-999	Faramea	parvibractea	Rubiaceae	2016	0.97	0.00019	1.17	2016	128	0.01	53.54
A2234	A2	A	1997	-999	Licaria	sarapiquensis	Lauraceae	2013	0.98	0.00024	1.55	2013	153	0.02	88.14
A2234	A2	A	1997	-999	Licaria	sarapiquensis	Lauraceae	2014	0.95	0.00023	1.5	2014	154	0.02	89.72
A2234	A2	A	1997	-999	Licaria	sarapiquensis	Lauraceae	2015	1.05	0.00026	1.68	2015	155	0.02	91.31
A2234	A2	A	1997	-999	Licaria	sarapiquensis	Lauraceae	2016	2.9	0.00072	4.74	2016	156	0.02	92.92
A2236	A2	A	1997	-999	Eugenia	lithosperma	Myrtaceae	2013	1.96	0.00049	3.25	2013	158	0.02	96.17
A2236	A2	A	1997	-999	Eugenia	lithosperma	Myrtaceae	2014	1.89	0.00048	3.19	2014	160	0.02	99.49
A2236	A2	A	1997	-999	Eugenia	lithosperma	Myrtaceae	2015	1.05	0.00027	1.79	2015	162	0.02	102.86
A2236	A2	A	1997	-999	Eugenia	lithosperma	Myrtaceae	2016	0.97	0.00025	1.67	2016	163	0.02	104.57
A2237	A2	A	1997	-999	Dendropanax	arboreus	Araliaceae	2013	0.98	0.00039	2.96	2013	250	0.05	309.97
A2237	A2	A	1997	-999	Dendropanax	arboreus	Araliaceae	2014	0.95	0.00037	2.86	2014	251	0.05	312.98
A2237	A2	A	1997	-999	Dendropanax	arboreus	Araliaceae	2015	2.1	0.00083	6.4	2015	252	0.05	316.01
A2237	A2	A	1997	-999	Dendropanax	arboreus	Araliaceae	2016	3.86	0.00155	11.95	2016	254	0.05	322.11
A2243	A2	A	1997	-999	Anaxagorea	crassipetala	Annonaceae	2013	0	0	0	2013	114	0.01	38.2
A2243	A2	A	1997	-999	Anaxagorea	crassipetala	Annonaceae	2014	0	0	0	2014	114	0.01	38.2
A2243	A2	A	1997	-999	Anaxagorea	crassipetala	Annonaceae	2015	0	0	0	2015	114	0.01	38.2
A2243	A2	A	1997	-999	Anaxagorea	crassipetala	Annonaceae	2016	0	0	0	2016	114	0.01	38.2
A2247	A2	A	1997	-999	Pentaclethra	macroloba	Fabaceae	2013	9.81	0.00444	35	2013	283	0.06	417.19
A2247	A2	A	1997	-999	Pentaclethra	macroloba	Fabaceae	2014	11.35	0.00533	42.32	2014	293	0.07	452.86
A2247	A2	A	1997	-999	Pentaclethra	macroloba	Fabaceae	2015	11.54	0.00563	45	2015	305	0.07	497.62
A2247	A2	A	1997	-999	Pentaclethra	macroloba	Fabaceae	2016	8.69	0.00438	35.18	2016	316	0.08	540.52
A2249	A2	A	1997	2017	Faramea	parvibractea	Rubiaceae	2013	0	0	0	2013	119	0.01	43.35
A2249	A2	A	1997	2017	Faramea	parvibractea	Rubiaceae	2014	0	0	0	2014	119	0.01	43.35
A2249	A2	A	1997	2017	Faramea	parvibractea	Rubiaceae	2015	1.05	0.0002	1.13	2015	119	0.01	43.35
A225	A2	A	1997	-999	Clethra	costaricensis	Clethraceae	2013	6.81	0.00584	50.27	2013	542	0.23	1818.3
A225	A2	A	1997	-999	Clethra	costaricensis	Clethraceae	2014	7.56	0.00657	56.65	2014	549	0.24	1869.94
A225	A2	A	1997	-999	Clethra	costaricensis	Clethraceae	2015	9.52	0.0084	72.51	2015	557	0.24	1929.86
A225	A2	A	1997	-999	Clethra	costaricensis	Clethraceae	2016	5.78	0.00516	44.64	2016	566	0.25	1998.39
A2253	A2	A	1998	-999	Ocotea	meziana	Lauraceae	2013	2.92	0.00083	5.77	2013	179	0.03	133.94
A2253	A2	A	1998	-999	Ocotea	meziana	Lauraceae	2014	2.84	0.00082	5.73	2014	182	0.03	139.87
A2253	A2	A	1998	-999	Ocotea	meziana	Lauraceae	2015	2.12	0.00062	4.35	2015	185	0.03	145.93
A2253	A2	A	1998	-999	Ocotea	meziana	Lauraceae	2016	0.96	0.00028	2	2016	187	0.03	150.05
A2255	A2	A	1998	-999	Casearia	arborea	Salicaceae	2013	7.85	0.00305	23.24	2013	243	0.05	289.3
A2255	A2	A	1998	-999	Casearia	arborea	Salicaceae	2014	6.62	0.00265	20.33	2014	251	0.05	312.98
A2255	A2	A	1998	-999	Casearia	arborea	Salicaceae	2015	6.29	0.00258	19.93	2015	258	0.05	334.48
A2255	A2	A	1998	-999	Casearia	arborea	Salicaceae	2016	6.76	0.00284	22.06	2016	264	0.05	353.49
A2256	A2	P	1998	-999	Socratea	exorrhiza	Arecaceae	2013	0	0	0	2013	112	0.01	36.25
A2256	A2	P	1998	-999	Socratea	exorrhiza	Arecaceae	2014	0	0	0	2014	112	0.01	36.25
A2256	A2	P	1998	-999	Socratea	exorrhiza	Arecaceae	2015	0	0	0	2015	112	0.01	36.25
A2256	A2	P	1998	-999	Socratea	exorrhiza	Arecaceae	2016	0	0	0	2016	112	0.01	36.25
A2258	A2	P	1998	-999	Socratea	exorrhiza	Arecaceae	2013	0	0	0	2013	163	0.02	104.57
A2258	A2	P	1998	-999	Socratea	exorrhiza	Arecaceae	2014	0	0	0	2014	163	0.02	104.57
A2258	A2	P	1998	-999	Socratea	exorrhiza	Arecaceae	2015	0	0	0	2015	163	0.02	104.57
A2258	A2	P	1998	-999	Socratea	exorrhiza	Arecaceae	2016	0	0	0	2016	163	0.02	104.57
A226	A2	A	1997	2016	Xylopia	sericophylla	Annonaceae	2013	0	0	0	2013	151	0.02	85.03
A226	A2	A	1997	2016	Xylopia	sericophylla	Annonaceae	2014	0	0	0	2014	151	0.02	85.03
A2261	A2	A	1999	-999	Protium	panamense	Burseraceae	2013	1.95	0.00051	3.49	2013	167	0.02	111.56
A2261	A2	A	1999	-999	Protium	panamense	Burseraceae	2014	0	0	0	2014	169	0.02	115.14
A2261	A2	A	1999	-999	Protium	panamense	Burseraceae	2015	4.23	0.00114	7.77	2015	169	0.02	115.14
A2261	A2	A	1999	-999	Protium	panamense	Burseraceae	2016	3.85	0.00106	7.3	2016	173	0.02	122.48
A2262	A2	A	1999	-999	Simarouba	amara	Simaroubaceae	2013	6.81	0.00304	23.95	2013	281	0.06	410.23
A2262	A2	A	1999	-999	Simarouba	amara	Simaroubaceae	2014	12.29	0.00569	45.03	2014	288	0.07	434.84
A2262	A2	A	1999	-999	Simarouba	amara	Simaroubaceae	2015	19.04	0.00927	74.13	2015	301	0.07	482.46
A2262	A2	A	1999	-999	Simarouba	amara	Simaroubaceae	2016	20.22	0.01047	84.56	2016	319	0.08	552.53
A2263	A2	A	1999	-999	Inga	alba	Fabaceae	2013	14.6	0.00563	42.9	2013	238	0.04	274.98
A2263	A2	A	1999	-999	Inga	alba	Fabaceae	2014	16.08	0.0066	51.04	2014	253	0.05	319.05
A2263	A2	A	1999	-999	Inga	alba	Fabaceae	2015	14.81	0.00644	50.42	2015	270	0.06	373.03
A2263	A2	A	1999	-999	Inga	alba	Fabaceae	2016	13.48	0.00616	48.69	2016	284	0.06	420.69
A2264	A2	A	1999	2017	Anaxagorea	crassipetala	Annonaceae	2013	1.96	0.00033	1.74	2013	106	0.01	30.74
A2264	A2	A	1999	2017	Anaxagorea	crassipetala	Annonaceae	2014	1.89	0.00032	1.74	2014	108	0.01	32.52
A2264	A2	A	1999	2017	Anaxagorea	crassipetala	Annonaceae	2015	0	0	0	2015	110	0.01	34.35
A2265	A2	P	2000	-999	Welfia	regia	Arecaceae	2013	0	0	0	2013	140	0.02	69
A2265	A2	P	2000	-999	Welfia	regia	Arecaceae	2014	0	0	0	2014	140	0.02	69
A2265	A2	P	2000	-999	Welfia	regia	Arecaceae	2015	0	0	0	2015	140	0.02	69
A2265	A2	P	2000	-999	Welfia	regia	Arecaceae	2016	0	0	0	2016	140	0.02	69
A2266	A2	A	2000	-999	Licaria	sarapiquensis	Lauraceae	2013	0.98	0.00022	1.4	2013	143	0.02	73.19
A2266	A2	A	2000	-999	Licaria	sarapiquensis	Lauraceae	2014	1.89	0.00043	2.74	2014	144	0.02	74.62
A2266	A2	A	2000	-999	Licaria	sarapiquensis	Lauraceae	2015	4.2	0.00098	6.27	2015	146	0.02	77.52
A2266	A2	A	2000	-999	Licaria	sarapiquensis	Lauraceae	2016	0.97	0.00023	1.48	2016	150	0.02	83.5
A2268	A2	A	2000	2015	Preslianthus	pittieri	Capparaceae	2013	0	0	0	2013	101	0.01	26.56
A2269	A2	P	2001	-999	Socratea	exorrhiza	Arecaceae	2013	0	0	0	2013	160	0.02	99.49
A2269	A2	P	2001	-999	Socratea	exorrhiza	Arecaceae	2014	0	0	0	2014	160	0.02	99.49
A2269	A2	P	2001	-999	Socratea	exorrhiza	Arecaceae	2015	0	0	0	2015	160	0.02	99.49
A2269	A2	P	2001	-999	Socratea	exorrhiza	Arecaceae	2016	0	0	0	2016	160	0.02	99.49
A227	A2	P	1997	-999	Socratea	exorrhiza	Arecaceae	2013	0	0	0	2013	155	0.02	91.31
A227	A2	P	1997	-999	Socratea	exorrhiza	Arecaceae	2014	0	0	0	2014	155	0.02	91.31
A227	A2	P	1997	-999	Socratea	exorrhiza	Arecaceae	2015	0	0	0	2015	155	0.02	91.31
A227	A2	P	1997	-999	Socratea	exorrhiza	Arecaceae	2016	0	0	0	2016	155	0.02	91.31
A2270	A2	P	2001	-999	Welfia	regia	Arecaceae	2013	0	0	0	2013	176	0.02	128.15
A2270	A2	P	2001	-999	Welfia	regia	Arecaceae	2014	0	0	0	2014	176	0.02	128.15
A2270	A2	P	2001	-999	Welfia	regia	Arecaceae	2015	0	0	0	2015	176	0.02	128.15
A2270	A2	P	2001	-999	Welfia	regia	Arecaceae	2016	0	0	0	2016	176	0.02	128.15
A2272	A2	P	2002	-999	Welfia	regia	Arecaceae	2013	0	0	0	2013	151	0.02	85.03
A2272	A2	P	2002	-999	Welfia	regia	Arecaceae	2014	0	0	0	2014	151	0.02	85.03
A2272	A2	P	2002	-999	Welfia	regia	Arecaceae	2015	0	0	0	2015	151	0.02	85.03
A2272	A2	P	2002	-999	Welfia	regia	Arecaceae	2016	0	0	0	2016	151	0.02	85.03
A2273	A2	A	2002	-999	Pourouma	bicolor	Urticaceae	2013	10.79	0.00335	24.04	2013	192	0.03	160.59
A2273	A2	A	2002	-999	Pourouma	bicolor	Urticaceae	2014	12.29	0.00405	29.57	2014	203	0.03	185.1
A2273	A2	A	2002	-999	Pourouma	bicolor	Urticaceae	2015	12.59	0.00439	32.6	2015	216	0.04	216.37
A2273	A2	A	2002	-999	Pourouma	bicolor	Urticaceae	2016	14.48	0.00536	40.41	2016	228	0.04	247.45
A2274	A2	A	2003	-999	Marila	laxiflora	Calophyllaceae	2013	0.97	0.00018	1.03	2013	118	0.01	42.29
A2274	A2	A	2003	-999	Marila	laxiflora	Calophyllaceae	2014	0.95	0.00018	1.01	2014	119	0.01	43.35
A2274	A2	A	2003	-999	Marila	laxiflora	Calophyllaceae	2015	0	0	0	2015	120	0.01	44.42
A2274	A2	A	2003	-999	Marila	laxiflora	Calophyllaceae	2016	2.89	0.00055	3.19	2016	120	0.01	44.42
A2275	A2	L	2003	-999				2013	0.97	0.00019	1.07	2013	121	0.01	45.51
A2275	A2	L	2003	-999				2014	0	0	0	2014	122	0.01	46.61
A2275	A2	L	2003	-999				2015	0	0	0	2015	122	0.01	46.61
A2275	A2	L	2003	-999				2016	0	0	0	2016	122	0.01	46.61
A2276	A2	A	2003	-999	Vochysia	ferruginea	Vochysiaceae	2013	13.63	0.00557	42.96	2013	253	0.05	319.05
A2276	A2	A	2003	-999	Vochysia	ferruginea	Vochysiaceae	2014	14.18	0.00612	47.76	2014	267	0.06	363.19
A2276	A2	A	2003	-999	Vochysia	ferruginea	Vochysiaceae	2015	12.7	0.00574	45.29	2015	282	0.06	413.7
A2276	A2	A	2003	-999	Vochysia	ferruginea	Vochysiaceae	2016	12.52	0.00591	46.98	2016	294	0.07	456.51
A2277	A2	P	2003	-999	Welfia	regia	Arecaceae	2013	0	0	0	2013	179	0.03	133.94
A2277	A2	P	2003	-999	Welfia	regia	Arecaceae	2014	0	0	0	2014	179	0.03	133.94
A2277	A2	P	2003	-999	Welfia	regia	Arecaceae	2015	0	0	0	2015	179	0.03	133.94
A2277	A2	P	2003	-999	Welfia	regia	Arecaceae	2016	0	0	0	2016	179	0.03	133.94
A2278	A2	A	2003	-999	Miconia	punctata	Melastomataceae	2013	5.89	0.00176	12.46	2013	187	0.03	150.05
A2278	A2	A	2003	-999	Miconia	punctata	Melastomataceae	2014	5.67	0.00175	12.51	2014	193	0.03	162.75
A2278	A2	A	2003	-999	Miconia	punctata	Melastomataceae	2015	4.2	0.00132	9.56	2015	199	0.03	175.98
A2278	A2	A	2003	-999	Miconia	punctata	Melastomataceae	2016	7.72	0.00251	18.29	2016	203	0.03	185.1
A2279	A2	A	2003	-999	Anaxagorea	crassipetala	Annonaceae	2013	0	0	0	2013	120	0.01	44.42
A2279	A2	A	2003	-999	Anaxagorea	crassipetala	Annonaceae	2014	0	0	0	2014	120	0.01	44.42
A2279	A2	A	2003	-999	Anaxagorea	crassipetala	Annonaceae	2015	0	0	0	2015	120	0.01	44.42
A2279	A2	A	2003	-999	Anaxagorea	crassipetala	Annonaceae	2016	0	0	0	2016	120	0.01	44.42
A228	A2	A	1997	-999	Xylopia	sericophylla	Annonaceae	2013	6.81	0.00425	35.35	2013	394	0.12	896.1
A228	A2	A	1997	-999	Xylopia	sericophylla	Annonaceae	2014	0	0	0	2014	401	0.13	932.41
A228	A2	A	1997	-999	Xylopia	sericophylla	Annonaceae	2015	1.06	0.00067	5.55	2015	401	0.13	932.41
A228	A2	A	1997	-999	Xylopia	sericophylla	Annonaceae	2016	3.85	0.00244	20.35	2016	402	0.13	937.66
A2280	A2	A	2004	-999	Apeiba	membranacea	Malvaceae	2013	6.81	0.00164	10.74	2013	150	0.02	83.5
A2280	A2	A	2004	-999	Apeiba	membranacea	Malvaceae	2014	9.46	0.00241	16.1	2014	157	0.02	94.54
A2280	A2	A	2004	-999	Apeiba	membranacea	Malvaceae	2015	12.7	0.00345	23.68	2015	167	0.02	111.56
A2280	A2	A	2004	-999	Apeiba	membranacea	Malvaceae	2016	10.59	0.00307	21.56	2016	179	0.03	133.94
A2281	A2	A	2004	-999	Vochysia	ferruginea	Vochysiaceae	2013	14.6	0.00515	38.36	2013	217	0.04	218.88
A2281	A2	A	2004	-999	Vochysia	ferruginea	Vochysiaceae	2014	16.08	0.00607	46.04	2014	232	0.04	258.29
A2281	A2	A	2004	-999	Vochysia	ferruginea	Vochysiaceae	2015	13.75	0.00552	42.45	2015	249	0.05	306.97
A2281	A2	A	2004	-999	Vochysia	ferruginea	Vochysiaceae	2016	11.56	0.00487	37.8	2016	262	0.05	347.09
A2282	A2	A	2004	-999	Anaxagorea	crassipetala	Annonaceae	2013	0	0	0	2013	113	0.01	37.22
A2282	A2	A	2004	-999	Anaxagorea	crassipetala	Annonaceae	2014	0	0	0	2014	113	0.01	37.22
A2282	A2	A	2004	-999	Anaxagorea	crassipetala	Annonaceae	2015	1.06	0.00019	1.04	2015	113	0.01	37.22
A2282	A2	A	2004	-999	Anaxagorea	crassipetala	Annonaceae	2016	0	0	0	2016	114	0.01	38.2
A2284	A2	A	2004	-999	Vochysia	ferruginea	Vochysiaceae	2013	11.77	0.00459	35.03	2013	242	0.05	286.41
A2284	A2	A	2004	-999	Vochysia	ferruginea	Vochysiaceae	2014	9.48	0.00386	29.75	2014	254	0.05	322.11
A2284	A2	A	2004	-999	Vochysia	ferruginea	Vochysiaceae	2015	12.55	0.00532	41.42	2015	264	0.05	353.49
A2284	A2	A	2004	-999	Vochysia	ferruginea	Vochysiaceae	2016	12.55	0.00557	43.76	2016	276	0.06	393.1
A2285	A2	A	2004	-999	Pouteria	calistophylla	Sapotaceae	2013	0	0	0	2013	137	0.01	64.93
A2285	A2	A	2004	-999	Pouteria	calistophylla	Sapotaceae	2014	3.78	0.00083	5.15	2014	137	0.01	64.93
A2285	A2	A	2004	-999	Pouteria	calistophylla	Sapotaceae	2015	0	0	0	2015	141	0.02	70.38
A2285	A2	A	2004	-999	Pouteria	calistophylla	Sapotaceae	2016	5.79	0.00131	8.32	2016	141	0.02	70.38
A229	A2	A	1997	-999	Dipteryx	panamensis	Fabaceae	2013	3.89	0.00579	51.86	2013	945	0.7	5972.62
A229	A2	A	1997	-999	Dipteryx	panamensis	Fabaceae	2014	11.35	0.01702	152.49	2014	949	0.71	6025.9
A229	A2	A	1997	-999	Dipteryx	panamensis	Fabaceae	2015	6.35	0.00961	86.15	2015	961	0.73	6187.17
A229	A2	A	1997	-999	Dipteryx	panamensis	Fabaceae	2016	7.7	0.01175	105.36	2016	967	0.73	6268.6
A23	A2	A	1997	-999	Preslianthus	pittieri	Capparaceae	2013	0	0	0	2013	124	0.01	48.86
A23	A2	A	1997	-999	Preslianthus	pittieri	Capparaceae	2014	0	0	0	2014	124	0.01	48.86
A23	A2	A	1997	-999	Preslianthus	pittieri	Capparaceae	2015	0	0	0	2015	124	0.01	48.86
A23	A2	A	1997	-999	Preslianthus	pittieri	Capparaceae	2016	0.96	0.00019	1.1	2016	124	0.01	48.86
A2305	A2	A	2011	-999	Guatteria	amplifolia	Annonaceae	2013	1.95	0.00032	1.67	2013	104	0.01	29.02
A2305	A2	A	2011	-999	Guatteria	amplifolia	Annonaceae	2014	1.89	0.00032	1.68	2014	106	0.01	30.74
A2305	A2	A	2011	-999	Guatteria	amplifolia	Annonaceae	2015	2.12	0.00036	1.94	2015	108	0.01	32.52
A2305	A2	A	2011	-999	Guatteria	amplifolia	Annonaceae	2016	2.89	0.00051	2.76	2016	110	0.01	34.35
A2306	A2	A	2005	2015	Anaxagorea	crassipetala	Annonaceae	2013	0	0	0	2013	109	0.01	33.43
A2309	A2	A	2005	-999	Sacoglottis	trichogyna	Humiriaceae	2013	5.89	0.0015	10.02	2013	159	0.02	97.82
A2309	A2	A	2005	-999	Sacoglottis	trichogyna	Humiriaceae	2014	12.29	0.00331	22.65	2014	165	0.02	108.04
A2309	A2	A	2005	-999	Sacoglottis	trichogyna	Humiriaceae	2015	9.44	0.00271	18.93	2015	178	0.02	132
A2309	A2	A	2005	-999	Sacoglottis	trichogyna	Humiriaceae	2016	9.66	0.00291	20.72	2016	187	0.03	150.05
A231	A2	P	1997	-999	Socratea	exorrhiza	Arecaceae	2013	0	0	0	2013	147	0.02	78.99
A231	A2	P	1997	-999	Socratea	exorrhiza	Arecaceae	2014	0	0	0	2014	147	0.02	78.99
A231	A2	P	1997	-999	Socratea	exorrhiza	Arecaceae	2015	0	0	0	2015	147	0.02	78.99
A231	A2	P	1997	-999	Socratea	exorrhiza	Arecaceae	2016	0	0	0	2016	147	0.02	78.99
A2311	A2	P	2006	-999	Welfia	regia	Arecaceae	2013	0	0	0	2013	181	0.03	137.88
A2311	A2	P	2006	-999	Welfia	regia	Arecaceae	2014	0	0	0	2014	181	0.03	137.88
A2311	A2	P	2006	-999	Welfia	regia	Arecaceae	2015	0	0	0	2015	181	0.03	137.88
A2311	A2	P	2006	-999	Welfia	regia	Arecaceae	2016	0	0	0	2016	181	0.03	137.88
A2312	A2	A	2006	-999	Inga	alba	Fabaceae	2013	0.97	0.0002	1.23	2013	132	0.01	58.46
A2312	A2	A	2006	-999	Inga	alba	Fabaceae	2014	2.84	0.0006	3.67	2014	133	0.01	59.72
A2312	A2	A	2006	-999	Inga	alba	Fabaceae	2015	2.12	0.00046	2.82	2015	136	0.01	63.61
A2312	A2	A	2006	-999	Inga	alba	Fabaceae	2016	3.85	0.00085	5.3	2016	138	0.01	66.27
A2313	A2	A	2006	-999	Protium	panamense	Burseraceae	2013	0.97	0.00017	0.92	2013	110	0.01	34.35
A2313	A2	A	2006	-999	Protium	panamense	Burseraceae	2014	1.89	0.00033	1.82	2014	111	0.01	35.29
A2313	A2	A	2006	-999	Protium	panamense	Burseraceae	2015	0	0	0	2015	113	0.01	37.22
A2313	A2	A	2006	-999	Protium	panamense	Burseraceae	2016	0	0	0	2016	113	0.01	37.22
A2315	A2	A	2006	-999	Brosimum	lactescens	Moraceae	2013	0	0	0	2013	109	0.01	33.43
A2315	A2	A	2006	-999	Brosimum	lactescens	Moraceae	2014	0.95	0.00016	0.87	2014	109	0.01	33.43
A2315	A2	A	2006	-999	Brosimum	lactescens	Moraceae	2015	0	0	0	2015	110	0.01	34.35
A2315	A2	A	2006	-999	Brosimum	lactescens	Moraceae	2016	0.97	0.00017	0.91	2016	110	0.01	34.35
A2317	A2	A	2006	-999	Casearia	arborea	Salicaceae	2013	5.89	0.00135	8.63	2013	143	0.02	73.19
A2317	A2	A	2006	-999	Casearia	arborea	Salicaceae	2014	6.62	0.00159	10.34	2014	149	0.02	81.98
A2317	A2	A	2006	-999	Casearia	arborea	Salicaceae	2015	4.2	0.00104	6.89	2015	156	0.02	92.92
A2317	A2	A	2006	-999	Casearia	arborea	Salicaceae	2016	8.69	0.00225	15.12	2016	160	0.02	99.49
A2318	A2	A	2007	-999	Ardisia	standleyana	Primulaceae	2013	2.92	0.00051	2.79	2013	110	0.01	34.35
A2318	A2	A	2007	-999	Ardisia	standleyana	Primulaceae	2014	0	0	0	2014	113	0.01	37.22
A2318	A2	A	2007	-999	Ardisia	standleyana	Primulaceae	2015	0	0	0	2015	113	0.01	37.22
A2318	A2	A	2007	-999	Ardisia	standleyana	Primulaceae	2016	0	0	0	2016	113	0.01	37.22
A2319	A2	A	2007	-999	Anaxagorea	crassipetala	Annonaceae	2013	0	0	0	2013	111	0.01	35.29
A2319	A2	A	2007	-999	Anaxagorea	crassipetala	Annonaceae	2014	0	0	0	2014	111	0.01	35.29
A2319	A2	A	2007	-999	Anaxagorea	crassipetala	Annonaceae	2015	0	0	0	2015	111	0.01	35.29
A2319	A2	A	2007	-999	Anaxagorea	crassipetala	Annonaceae	2016	0.96	0.00017	0.92	2016	111	0.01	35.29
A2320	A2	P	2007	-999	Socratea	exorrhiza	Arecaceae	2013	0	0	0	2013	106	0.01	30.74
A2320	A2	P	2007	-999	Socratea	exorrhiza	Arecaceae	2014	0	0	0	2014	106	0.01	30.74
A2320	A2	P	2007	-999	Socratea	exorrhiza	Arecaceae	2015	0	0	0	2015	106	0.01	30.74
A2320	A2	P	2007	-999	Socratea	exorrhiza	Arecaceae	2016	0	0	0	2016	106	0.01	30.74
A2321	A2	A	2007	-999	Pentaclethra	macroloba	Fabaceae	2013	4.91	0.00101	6.14	2013	129	0.01	54.75
A2321	A2	A	2007	-999	Pentaclethra	macroloba	Fabaceae	2014	3.78	0.00081	4.98	2014	134	0.01	61
A2321	A2	A	2007	-999	Pentaclethra	macroloba	Fabaceae	2015	2.1	0.00046	2.86	2015	138	0.01	66.27
A2321	A2	A	2007	-999	Pentaclethra	macroloba	Fabaceae	2016	4.83	0.00108	6.83	2016	140	0.02	69
A2322	A2	A	2008	-999	Pouteria	campechiana	Sapotaceae	2013	2.92	0.00055	3.18	2013	119	0.01	43.35
A2322	A2	A	2008	-999	Pouteria	campechiana	Sapotaceae	2014	0	0	0	2014	122	0.01	46.61
A2322	A2	A	2008	-999	Pouteria	campechiana	Sapotaceae	2015	2.12	0.00041	2.38	2015	122	0.01	46.61
A2322	A2	A	2008	-999	Pouteria	campechiana	Sapotaceae	2016	3.85	0.00076	4.51	2016	124	0.01	48.86
A2323	A2	P	2008	-999	Socratea	exorrhiza	Arecaceae	2013	0	0	0	2013	115	0.01	39.2
A2323	A2	P	2008	-999	Socratea	exorrhiza	Arecaceae	2014	0	0	0	2014	115	0.01	39.2
A2323	A2	P	2008	-999	Socratea	exorrhiza	Arecaceae	2015	0	0	0	2015	115	0.01	39.2
A2323	A2	P	2008	-999	Socratea	exorrhiza	Arecaceae	2016	0	0	0	2016	115	0.01	39.2
A2327	A2	A	2008	2015	Anaxagorea	crassipetala	Annonaceae	2013	0	0	0	2013	112	0.01	36.25
A2328	A2	A	2008	-999	Anaxagorea	crassipetala	Annonaceae	2013	0	0	0	2013	106	0.01	30.74
A2328	A2	A	2008	-999	Anaxagorea	crassipetala	Annonaceae	2014	0	0	0	2014	106	0.01	30.74
A2328	A2	A	2008	-999	Anaxagorea	crassipetala	Annonaceae	2015	0	0	0	2015	106	0.01	30.74
A2328	A2	A	2008	-999	Anaxagorea	crassipetala	Annonaceae	2016	0.97	0.00016	0.85	2016	106	0.01	30.74
A2329	A2	A	2009	-999	Casearia	arborea	Salicaceae	2013	0.97	0.00017	0.94	2013	112	0.01	36.25
A2329	A2	A	2009	-999	Casearia	arborea	Salicaceae	2014	0	0	0	2014	113	0.01	37.22
A2329	A2	A	2009	-999	Casearia	arborea	Salicaceae	2015	0	0	0	2015	113	0.01	37.22
A2329	A2	A	2009	-999	Casearia	arborea	Salicaceae	2016	4.82	0.00087	4.88	2016	113	0.01	37.22
A2330	A2	P	2009	-999	Socratea	exorrhiza	Arecaceae	2013	8.76	0.00195	12.25	2013	137	0.01	64.93
A2330	A2	P	2009	-999	Socratea	exorrhiza	Arecaceae	2014	4.73	0.0011	7.1	2014	146	0.02	77.52
A2330	A2	P	2009	-999	Socratea	exorrhiza	Arecaceae	2015	0	0	0	2015	151	0.02	85.03
A2330	A2	P	2009	-999	Socratea	exorrhiza	Arecaceae	2016	0	0	0	2016	151	0.02	85.03
A2331	A2	A	2009	-999	Warszewiczia	coccinea	Rubiaceae	2013	2.92	0.00058	3.39	2013	124	0.01	48.86
A2331	A2	A	2009	-999	Warszewiczia	coccinea	Rubiaceae	2014	3.78	0.00077	4.59	2014	127	0.01	52.35
A2331	A2	A	2009	-999	Warszewiczia	coccinea	Rubiaceae	2015	1.06	0.00022	1.32	2015	131	0.01	57.2
A2331	A2	A	2009	-999	Warszewiczia	coccinea	Rubiaceae	2016	7.7	0.00165	10.15	2016	132	0.01	58.46
A2335	A2	P	2009	2015	Socratea	exorrhiza	Arecaceae	2013	3.92	0.00075	4.36	2013	120	0.01	44.42
A2336	A2	A	2009	-999	Casearia	arborea	Salicaceae	2013	1.96	0.00035	1.89	2013	111	0.01	35.29
A2336	A2	A	2009	-999	Casearia	arborea	Salicaceae	2014	0.95	0.00017	0.93	2014	113	0.01	37.22
A2336	A2	A	2009	-999	Casearia	arborea	Salicaceae	2015	1.05	0.00019	1.05	2015	114	0.01	38.2
A2336	A2	A	2009	-999	Casearia	arborea	Salicaceae	2016	1.93	0.00035	1.97	2016	115	0.01	39.2
A2337	A2	A	2009	-999	Virola	sebifera	Myristicaceae	2013	5.89	0.00138	8.89	2013	146	0.02	77.52
A2337	A2	A	2009	-999	Virola	sebifera	Myristicaceae	2014	0.95	0.00023	1.48	2014	152	0.02	86.58
A2337	A2	A	2009	-999	Virola	sebifera	Myristicaceae	2015	2.1	0.00051	3.32	2015	153	0.02	88.14
A2337	A2	A	2009	-999	Virola	sebifera	Myristicaceae	2016	0.97	0.00024	1.55	2016	155	0.02	91.31
A2338	A2	A	2009	-999	Theobroma	simiarum	Malvaceae	2013	0	0	0	2013	105	0.01	29.88
A2338	A2	A	2009	-999	Theobroma	simiarum	Malvaceae	2014	0.95	0.00016	0.82	2014	105	0.01	29.88
A2338	A2	A	2009	-999	Theobroma	simiarum	Malvaceae	2015	1.05	0.00018	0.92	2015	106	0.01	30.74
A2338	A2	A	2009	-999	Theobroma	simiarum	Malvaceae	2016	0.97	0.00016	0.86	2016	107	0.01	31.62
A2339	A2	A	2010	-999	Anaxagorea	crassipetala	Annonaceae	2013	0.98	0.00016	0.84	2013	104	0.01	29.02
A2339	A2	A	2010	-999	Anaxagorea	crassipetala	Annonaceae	2014	1.9	0.00032	1.66	2014	105	0.01	29.88
A2339	A2	A	2010	-999	Anaxagorea	crassipetala	Annonaceae	2015	0	0	0	2015	107	0.01	31.62
A2339	A2	A	2010	-999	Anaxagorea	crassipetala	Annonaceae	2016	0	0	0	2016	107	0.01	31.62
A234	A2	P	1997	-999	Socratea	exorrhiza	Arecaceae	2013	0	0	0	2013	134	0.01	61
A234	A2	P	1997	-999	Socratea	exorrhiza	Arecaceae	2014	0	0	0	2014	134	0.01	61
A234	A2	P	1997	-999	Socratea	exorrhiza	Arecaceae	2015	0	0	0	2015	134	0.01	61
A234	A2	P	1997	-999	Socratea	exorrhiza	Arecaceae	2016	0	0	0	2016	134	0.01	61
A2340	A2	A	2010	-999	Laetia	procera	Salicaceae	2013	11.77	0.00263	16.56	2013	136	0.01	63.61
A2340	A2	A	2010	-999	Laetia	procera	Salicaceae	2014	10.4	0.00251	16.4	2014	148	0.02	80.48
A2340	A2	A	2010	-999	Laetia	procera	Salicaceae	2015	14.68	0.00383	25.87	2015	159	0.02	97.82
A2340	A2	A	2010	-999	Laetia	procera	Salicaceae	2016	16.42	0.00468	32.68	2016	173	0.02	122.48
A2341	A2	A	2011	-999	Vochysia	ferruginea	Vochysiaceae	2013	2.92	0.0005	2.7	2013	108	0.01	32.52
A2341	A2	A	2011	-999	Vochysia	ferruginea	Vochysiaceae	2014	0.95	0.00017	0.9	2014	111	0.01	35.29
A2341	A2	A	2011	-999	Vochysia	ferruginea	Vochysiaceae	2015	3.17	0.00057	3.12	2015	112	0.01	36.25
A2341	A2	A	2011	-999	Vochysia	ferruginea	Vochysiaceae	2016	0.96	0.00017	0.98	2016	115	0.01	39.2
A2342	A2	A	2011	-999	Anaxagorea	crassipetala	Annonaceae	2013	0	0	0	2013	102	0.01	27.37
A2342	A2	A	2011	-999	Anaxagorea	crassipetala	Annonaceae	2014	0.95	0.00015	0.78	2014	102	0.01	27.37
A2342	A2	A	2011	-999	Anaxagorea	crassipetala	Annonaceae	2015	2.12	0.00035	1.79	2015	103	0.01	28.19
A2342	A2	A	2011	-999	Anaxagorea	crassipetala	Annonaceae	2016	1.93	0.00032	1.68	2016	105	0.01	29.88
A2343	A2	A	2011	-999	Guatteria	amplifolia	Annonaceae	2013	0	0	0	2013	108	0.01	32.52
A2343	A2	A	2011	-999	Guatteria	amplifolia	Annonaceae	2014	0	0	0	2014	108	0.01	32.52
A2343	A2	A	2011	-999	Guatteria	amplifolia	Annonaceae	2015	1.05	0.00018	0.95	2015	108	0.01	32.52
A2343	A2	A	2011	-999	Guatteria	amplifolia	Annonaceae	2016	0	0	0	2016	109	0.01	33.43
A2345	A2	A	2012	-999	Protium	confusum	Burseraceae	2013	3.89	0.00066	3.52	2013	106	0.01	30.74
A2345	A2	A	2012	-999	Protium	confusum	Burseraceae	2014	0.95	0.00016	0.89	2014	110	0.01	34.35
A2345	A2	A	2012	-999	Protium	confusum	Burseraceae	2015	1.06	0.00019	1.01	2015	111	0.01	35.29
A2345	A2	A	2012	-999	Protium	confusum	Burseraceae	2016	3.85	0.00069	3.82	2016	112	0.01	36.25
A2346	A2	A	2012	-999	Cassipourea	elliptica	Rhizophoraceae	2013	0	0	0	2013	101	0.01	26.56
A2346	A2	A	2012	-999	Cassipourea	elliptica	Rhizophoraceae	2014	0	0	0	2014	101	0.01	26.56
A2346	A2	A	2012	-999	Cassipourea	elliptica	Rhizophoraceae	2015	1.06	0.00017	0.85	2015	101	0.01	26.56
A2346	A2	A	2012	-999	Cassipourea	elliptica	Rhizophoraceae	2016	0	0	0	2016	102	0.01	27.37
A2347	A2	P	2012	-999	Welfia	regia	Arecaceae	2013	0	0	0	2013	153	0.02	88.14
A2347	A2	P	2012	-999	Welfia	regia	Arecaceae	2014	0	0	0	2014	153	0.02	88.14
A2347	A2	P	2012	-999	Welfia	regia	Arecaceae	2015	0	0	0	2015	153	0.02	88.14
A2347	A2	P	2012	-999	Welfia	regia	Arecaceae	2016	0	0	0	2016	153	0.02	88.14
A2348	A2	A	2012	-999	Stryphnodendron	microstachyum	Fabaceae	2013	18.64	0.00391	23.87	2013	124	0.01	48.86
A2348	A2	A	2012	-999	Stryphnodendron	microstachyum	Fabaceae	2014	13.27	0.00313	20.24	2014	143	0.02	73.19
A2348	A2	A	2012	-999	Stryphnodendron	microstachyum	Fabaceae	2015	18.83	0.00491	33.16	2015	157	0.02	94.54
A2348	A2	A	2012	-999	Stryphnodendron	microstachyum	Fabaceae	2016	18.35	0.00532	37.34	2016	175	0.02	126.24
A2349	A2	P	2012	-999	Welfia	regia	Arecaceae	2013	0	0	0	2013	142	0.02	71.78
A2349	A2	P	2012	-999	Welfia	regia	Arecaceae	2014	0	0	0	2014	142	0.02	71.78
A2349	A2	P	2012	-999	Welfia	regia	Arecaceae	2015	0	0	0	2015	142	0.02	71.78
A2349	A2	P	2012	-999	Welfia	regia	Arecaceae	2016	0	0	0	2016	142	0.02	71.78
A235	A2	P	1997	-999	Socratea	exorrhiza	Arecaceae	2013	0	0	0	2013	111	0.01	35.29
A235	A2	P	1997	-999	Socratea	exorrhiza	Arecaceae	2014	0	0	0	2014	111	0.01	35.29
A235	A2	P	1997	-999	Socratea	exorrhiza	Arecaceae	2015	0	0	0	2015	111	0.01	35.29
A235	A2	P	1997	-999	Socratea	exorrhiza	Arecaceae	2016	0	0	0	2016	111	0.01	35.29
A2350	A2	A	2012	-999	Theobroma	simiarum	Malvaceae	2013	1.96	0.00032	1.63	2013	102	0.01	27.37
A2350	A2	A	2012	-999	Theobroma	simiarum	Malvaceae	2014	0.95	0.00016	0.8	2014	104	0.01	29.02
A2350	A2	A	2012	-999	Theobroma	simiarum	Malvaceae	2015	1.05	0.00017	0.91	2015	105	0.01	29.88
A2350	A2	A	2012	-999	Theobroma	simiarum	Malvaceae	2016	3.86	0.00066	3.49	2016	106	0.01	30.74
A2352	A2	A	2013	-999	Warszewiczia	coccinea	Rubiaceae	2013	4.87	0.00078	4	2013	100	0.01	25.77
A2352	A2	A	2013	-999	Warszewiczia	coccinea	Rubiaceae	2014	4.73	0.0008	4.23	2014	105	0.01	29.88
A2352	A2	A	2013	-999	Warszewiczia	coccinea	Rubiaceae	2015	3.17	0.00056	3.03	2015	110	0.01	34.35
A2352	A2	A	2013	-999	Warszewiczia	coccinea	Rubiaceae	2016	4.82	0.00087	4.88	2016	113	0.01	37.22
A2353	A2	A	2013	-999	Protium	confusum	Burseraceae	2013	4.91	0.00081	4.25	2013	103	0.01	28.19
A2353	A2	A	2013	-999	Protium	confusum	Burseraceae	2014	5.67	0.00099	5.38	2014	108	0.01	32.52
A2353	A2	A	2013	-999	Protium	confusum	Burseraceae	2015	5.24	0.00096	5.4	2015	114	0.01	38.2
A2353	A2	A	2013	-999	Protium	confusum	Burseraceae	2016	7.72	0.00149	8.69	2016	119	0.01	43.35
A2354	A2	A	2013	-999	Xylopia	sericophylla	Annonaceae	2013	12.76	0.00229	12.75	2013	108	0.01	32.52
A2354	A2	A	2013	-999	Xylopia	sericophylla	Annonaceae	2014	12.32	0.00247	14.69	2014	121	0.01	45.51
A2354	A2	A	2013	-999	Xylopia	sericophylla	Annonaceae	2015	8.37	0.00181	11.27	2015	134	0.01	61
A2354	A2	A	2013	-999	Xylopia	sericophylla	Annonaceae	2016	11.59	0.00269	17.32	2016	142	0.02	71.78
A2355	A2	A	2013	-999	Protium	pittieri	Burseraceae	2013	8.83	0.00155	8.43	2013	107	0.01	31.62
A2355	A2	A	2013	-999	Protium	pittieri	Burseraceae	2014	4.73	0.00088	5	2014	116	0.01	40.22
A2355	A2	A	2013	-999	Protium	pittieri	Burseraceae	2015	4.2	0.00081	4.72	2015	121	0.01	45.51
A2355	A2	A	2013	-999	Protium	pittieri	Burseraceae	2016	3.86	0.00077	4.57	2016	125	0.01	50.01
A2356	A2	A	2014	-999	Protium	pittieri	Burseraceae	2014	10.4	0.00176	9.32	2014	102	0.01	27.37
A2356	A2	A	2014	-999	Protium	pittieri	Burseraceae	2015	8.46	0.00156	8.77	2015	113	0.01	37.22
A2356	A2	A	2014	-999	Protium	pittieri	Burseraceae	2016	8.67	0.00171	10.07	2016	121	0.01	45.51
A2357	A2	P	2014	-999	Welfia	regia	Arecaceae	2014	0	0	0	2014	145	0.02	76.06
A2357	A2	P	2014	-999	Welfia	regia	Arecaceae	2015	0	0	0	2015	145	0.02	76.06
A2357	A2	P	2014	-999	Welfia	regia	Arecaceae	2016	0	0	0	2016	145	0.02	76.06
A2358	A2	A	2014	-999	Laetia	procera	Salicaceae	2014	5.67	0.00104	5.88	2014	114	0.01	38.2
A2358	A2	A	2014	-999	Laetia	procera	Salicaceae	2015	9.52	0.00186	10.92	2015	120	0.01	44.42
A2358	A2	A	2014	-999	Laetia	procera	Salicaceae	2016	13.48	0.00288	17.76	2016	129	0.01	54.75
A2360	A2	A	2014	-999	Pentaclethra	macroloba	Fabaceae	2014	12.29	0.00211	11.37	2014	103	0.01	28.19
A2360	A2	A	2014	-999	Pentaclethra	macroloba	Fabaceae	2015	15.73	0.00305	17.82	2015	116	0.01	40.22
A2360	A2	A	2014	-999	Pentaclethra	macroloba	Fabaceae	2016	19.31	0.00428	26.87	2016	131	0.01	57.2
A2361	A2	A	2014	-999	Anaxagorea	crassipetala	Annonaceae	2014	2.84	0.00046	2.33	2014	101	0.01	26.56
A2361	A2	A	2014	-999	Anaxagorea	crassipetala	Annonaceae	2015	0	0	0	2015	104	0.01	29.02
A2361	A2	A	2014	-999	Anaxagorea	crassipetala	Annonaceae	2016	0.97	0.00016	0.82	2016	104	0.01	29.02
A2362	A2	A	2014	-999	Pourouma	bicolor	Urticaceae	2014	20.8	0.00395	22.79	2014	110	0.01	34.35
A2362	A2	A	2014	-999	Pourouma	bicolor	Urticaceae	2015	19.93	0.00443	27.88	2015	132	0.01	58.46
A2362	A2	A	2014	-999	Pourouma	bicolor	Urticaceae	2016	21.24	0.00541	36.16	2016	151	0.02	85.03
A2363	A2	A	2014	-999	Pouteria	campechiana	Sapotaceae	2014	3.78	0.00063	3.3	2014	104	0.01	29.02
A2363	A2	A	2014	-999	Pouteria	campechiana	Sapotaceae	2015	4.2	0.00072	3.91	2015	108	0.01	32.52
A2363	A2	A	2014	-999	Pouteria	campechiana	Sapotaceae	2016	5.79	0.00105	5.83	2016	112	0.01	36.25
A2364	A2	A	2015	-999	Licaria	sarapiquensis	Lauraceae	2015	4.23	0.00071	3.76	2015	105	0.01	29.88
A2364	A2	A	2015	-999	Licaria	sarapiquensis	Lauraceae	2016	2.89	0.0005	2.72	2016	109	0.01	33.43
A2365	A2	A	2015	-999	Anaxagorea	crassipetala	Annonaceae	2015	0	0	0	2015	100	0.01	25.77
A2365	A2	A	2015	-999	Anaxagorea	crassipetala	Annonaceae	2016	0.96	0.00015	0.76	2016	100	0.01	25.77
A2366	A2	A	2015	-999	Warszewiczia	coccinea	Rubiaceae	2015	2.12	0.00034	1.72	2015	101	0.01	26.56
A2366	A2	A	2015	-999	Warszewiczia	coccinea	Rubiaceae	2016	1.93	0.00031	1.63	2016	103	0.01	28.19
A2367	A2	A	2016	-999	Protium	panamense	Burseraceae	2016	5.78	0.00093	4.79	2016	100	0.01	25.77
A2368	A2	A	2016	-999	Alibertia	atlantica	Rubiaceae	2016	0	0	0	2016	102	0.01	27.37
A237	A2	P	1997	-999	Socratea	exorrhiza	Arecaceae	2013	0	0	0	2013	140	0.02	69
A237	A2	P	1997	-999	Socratea	exorrhiza	Arecaceae	2014	0	0	0	2014	140	0.02	69
A237	A2	P	1997	-999	Socratea	exorrhiza	Arecaceae	2015	0	0	0	2015	140	0.02	69
A237	A2	P	1997	-999	Socratea	exorrhiza	Arecaceae	2016	0	0	0	2016	140	0.02	69
A238	A2	A	1997	-999	Anaxagorea	crassipetala	Annonaceae	2013	0	0	0	2013	116	0.01	40.22
A238	A2	A	1997	-999	Anaxagorea	crassipetala	Annonaceae	2014	0	0	0	2014	116	0.01	40.22
A238	A2	A	1997	-999	Anaxagorea	crassipetala	Annonaceae	2015	0	0	0	2015	116	0.01	40.22
A238	A2	A	1997	-999	Anaxagorea	crassipetala	Annonaceae	2016	0.96	0.00018	0.99	2016	116	0.01	40.22
A239	A2	A	1997	-999	Warszewiczia	coccinea	Rubiaceae	2013	0	0	0	2013	135	0.01	62.3
A239	A2	A	1997	-999	Warszewiczia	coccinea	Rubiaceae	2014	0	0	0	2014	135	0.01	62.3
A239	A2	A	1997	-999	Warszewiczia	coccinea	Rubiaceae	2015	0	0	0	2015	135	0.01	62.3
A239	A2	A	1997	-999	Warszewiczia	coccinea	Rubiaceae	2016	0.96	0.0002	1.26	2016	135	0.01	62.3
A24	A2	A	1997	-999	Byrsonima	arthropoda	Malpighiaceae	2013	8.76	0.00353	27.16	2013	252	0.05	316.01
A24	A2	A	1997	-999	Byrsonima	arthropoda	Malpighiaceae	2014	4.73	0.00196	15.15	2014	261	0.05	343.92
A24	A2	A	1997	-999	Byrsonima	arthropoda	Malpighiaceae	2015	6.35	0.00268	20.86	2015	266	0.06	359.94
A24	A2	A	1997	-999	Byrsonima	arthropoda	Malpighiaceae	2016	6.74	0.00292	22.8	2016	272	0.06	379.66
A240	A2	A	1997	-999	Warszewiczia	coccinea	Rubiaceae	2013	0.97	0.00032	2.33	2013	208	0.03	196.83
A240	A2	A	1997	-999	Warszewiczia	coccinea	Rubiaceae	2014	0	0	0	2014	209	0.03	199.22
A240	A2	A	1997	-999	Warszewiczia	coccinea	Rubiaceae	2015	0	0	0	2015	209	0.03	199.22
A240	A2	A	1997	-999	Warszewiczia	coccinea	Rubiaceae	2016	0.96	0.00032	2.32	2016	209	0.03	199.22
A241	A2	P	1997	-999	Welfia	regia	Arecaceae	2013	0	0	0	2013	186	0.03	147.98
A241	A2	P	1997	-999	Welfia	regia	Arecaceae	2014	0	0	0	2014	186	0.03	147.98
A241	A2	P	1997	-999	Welfia	regia	Arecaceae	2015	0	0	0	2015	186	0.03	147.98
A241	A2	P	1997	-999	Welfia	regia	Arecaceae	2016	0	0	0	2016	186	0.03	147.98
A242	A2	P	1997	-999	Socratea	exorrhiza	Arecaceae	2013	0	0	0	2013	149	0.02	81.98
A242	A2	P	1997	-999	Socratea	exorrhiza	Arecaceae	2014	0	0	0	2014	149	0.02	81.98
A242	A2	P	1997	-999	Socratea	exorrhiza	Arecaceae	2015	0	0	0	2015	149	0.02	81.98
A242	A2	P	1997	-999	Socratea	exorrhiza	Arecaceae	2016	0	0	0	2016	149	0.02	81.98
A243	A2	A	1997	-999	Preslianthus	pittieri	Capparaceae	2013	0.97	0.00018	1.03	2013	118	0.01	42.29
A243	A2	A	1997	-999	Preslianthus	pittieri	Capparaceae	2014	0	0	0	2014	119	0.01	43.35
A243	A2	A	1997	-999	Preslianthus	pittieri	Capparaceae	2015	0	0	0	2015	119	0.01	43.35
A243	A2	A	1997	-999	Preslianthus	pittieri	Capparaceae	2016	0	0	0	2016	119	0.01	43.35
A244	A2	P	1997	-999	Socratea	exorrhiza	Arecaceae	2013	0	0	0	2013	130	0.01	55.97
A244	A2	P	1997	-999	Socratea	exorrhiza	Arecaceae	2014	0	0	0	2014	130	0.01	55.97
A244	A2	P	1997	-999	Socratea	exorrhiza	Arecaceae	2015	0	0	0	2015	130	0.01	55.97
A244	A2	P	1997	-999	Socratea	exorrhiza	Arecaceae	2016	0	0	0	2016	130	0.01	55.97
A245	A2	A	1997	-999	Dussia	macroprophyllata	Fabaceae	2013	0	0	0	2013	226	0.04	242.12
A245	A2	A	1997	-999	Dussia	macroprophyllata	Fabaceae	2014	0	0	0	2014	226	0.04	242.12
A245	A2	A	1997	-999	Dussia	macroprophyllata	Fabaceae	2015	0	0	0	2015	226	0.04	242.12
A245	A2	A	1997	-999	Dussia	macroprophyllata	Fabaceae	2016	0	0	0	2016	226	0.04	242.12
A247	A2	A	1997	2016	Jacaranda	copaia	Bignoniaceae	2013	1.95	0.0015	12.82	2013	491	0.19	1463.9
A247	A2	A	1997	2016	Jacaranda	copaia	Bignoniaceae	2014	0.95	0.00073	6.25	2014	493	0.19	1477.08
A248	A2	A	1997	-999	Pentaclethra	macroloba	Fabaceae	2013	1.95	0.00092	7.35	2013	301	0.07	482.46
A248	A2	A	1997	-999	Pentaclethra	macroloba	Fabaceae	2014	7.56	0.00365	29.11	2014	303	0.07	490.01
A248	A2	A	1997	-999	Pentaclethra	macroloba	Fabaceae	2015	5.29	0.0026	20.87	2015	311	0.08	520.79
A248	A2	A	1997	-999	Pentaclethra	macroloba	Fabaceae	2016	6.74	0.00338	27.19	2016	316	0.08	540.52
A249	A2	A	1997	2017	Dussia	macroprophyllata	Fabaceae	2013	0	0	0	2013	316	0.08	540.52
A249	A2	A	1997	2017	Dussia	macroprophyllata	Fabaceae	2014	0	0	0	2014	316	0.08	540.52
A249	A2	A	1997	2017	Dussia	macroprophyllata	Fabaceae	2015	0	0	0	2015	316	0.08	540.52
A25	A2	A	1997	-999	Guatteria	aeruginosa	Annonaceae	2013	2.92	0.0011	8.32	2013	238	0.04	274.98
A25	A2	A	1997	-999	Guatteria	aeruginosa	Annonaceae	2014	0	0	0	2014	241	0.05	283.53
A25	A2	A	1997	-999	Guatteria	aeruginosa	Annonaceae	2015	1.06	0.0004	3.05	2015	241	0.05	283.53
A25	A2	A	1997	-999	Guatteria	aeruginosa	Annonaceae	2016	0	0	0	2016	242	0.05	286.41
A250	A2	P	1997	-999	Welfia	regia	Arecaceae	2013	0	0	0	2013	180	0.03	135.9
A250	A2	P	1997	-999	Welfia	regia	Arecaceae	2014	0	0	0	2014	180	0.03	135.9
A250	A2	P	1997	-999	Welfia	regia	Arecaceae	2015	0	0	0	2015	180	0.03	135.9
A250	A2	P	1997	-999	Welfia	regia	Arecaceae	2016	0	0	0	2016	180	0.03	135.9
A251	A2	P	1997	-999	Socratea	exorrhiza	Arecaceae	2013	0	0	0	2013	137	0.01	64.93
A251	A2	P	1997	-999	Socratea	exorrhiza	Arecaceae	2014	0	0	0	2014	137	0.01	64.93
A251	A2	P	1997	-999	Socratea	exorrhiza	Arecaceae	2015	0	0	0	2015	137	0.01	64.93
A251	A2	P	1997	-999	Socratea	exorrhiza	Arecaceae	2016	0	0	0	2016	137	0.01	64.93
A252	A2	P	1997	-999	Socratea	exorrhiza	Arecaceae	2013	0	0	0	2013	110	0.01	34.35
A252	A2	P	1997	-999	Socratea	exorrhiza	Arecaceae	2014	0	0	0	2014	110	0.01	34.35
A252	A2	P	1997	-999	Socratea	exorrhiza	Arecaceae	2015	0	0	0	2015	110	0.01	34.35
A252	A2	P	1997	-999	Socratea	exorrhiza	Arecaceae	2016	0	0	0	2016	110	0.01	34.35
A253	A2	A	1997	-999	Pentaclethra	macroloba	Fabaceae	2013	4.87	0.00541	47.58	2013	705	0.39	3209.1
A253	A2	A	1997	-999	Pentaclethra	macroloba	Fabaceae	2014	5.67	0.00635	55.92	2014	710	0.4	3257.97
A253	A2	A	1997	-999	Pentaclethra	macroloba	Fabaceae	2015	1.06	0.00119	10.48	2015	716	0.4	3317.12
A253	A2	A	1997	-999	Pentaclethra	macroloba	Fabaceae	2016	7.7	0.00873	76.86	2016	717	0.4	3327.03
A255	A2	P	1997	-999	Socratea	exorrhiza	Arecaceae	2013	0	0	0	2013	171	0.02	118.78
A255	A2	P	1997	-999	Socratea	exorrhiza	Arecaceae	2014	0	0	0	2014	171	0.02	118.78
A255	A2	P	1997	-999	Socratea	exorrhiza	Arecaceae	2015	0	0	0	2015	171	0.02	118.78
A255	A2	P	1997	-999	Socratea	exorrhiza	Arecaceae	2016	0	0	0	2016	171	0.02	118.78
A256	A2	A	1997	-999	Swartzia	nicaraguensis	Fabaceae	2013	1.95	0.00119	9.85	2013	388	0.12	865.55
A256	A2	A	1997	-999	Swartzia	nicaraguensis	Fabaceae	2014	0.95	0.00058	4.81	2014	390	0.12	875.67
A256	A2	A	1997	-999	Swartzia	nicaraguensis	Fabaceae	2015	1.06	0.00065	5.39	2015	391	0.12	880.75
A256	A2	A	1997	-999	Swartzia	nicaraguensis	Fabaceae	2016	0	0	0	2016	392	0.12	885.85
A257	A2	P	1997	-999	Socratea	exorrhiza	Arecaceae	2013	0	0	0	2013	128	0.01	53.54
A257	A2	P	1997	-999	Socratea	exorrhiza	Arecaceae	2014	0	0	0	2014	128	0.01	53.54
A257	A2	P	1997	-999	Socratea	exorrhiza	Arecaceae	2015	0	0	0	2015	128	0.01	53.54
A257	A2	P	1997	-999	Socratea	exorrhiza	Arecaceae	2016	0	0	0	2016	128	0.01	53.54
A258	A2	P	1997	-999	Welfia	regia	Arecaceae	2013	0	0	0	2013	173	0.02	122.48
A258	A2	P	1997	-999	Welfia	regia	Arecaceae	2014	0	0	0	2014	173	0.02	122.48
A258	A2	P	1997	-999	Welfia	regia	Arecaceae	2015	0	0	0	2015	173	0.02	122.48
A258	A2	P	1997	-999	Welfia	regia	Arecaceae	2016	0	0	0	2016	173	0.02	122.48
A259	A2	A	1997	-999	Pentaclethra	macroloba	Fabaceae	2013	0	0	0	2013	649	0.33	2686.93
A259	A2	A	1997	-999	Pentaclethra	macroloba	Fabaceae	2014	7.56	0.00776	67.85	2014	649	0.33	2686.93
A259	A2	A	1997	-999	Pentaclethra	macroloba	Fabaceae	2015	15.87	0.01656	145.04	2015	657	0.34	2758.69
A259	A2	A	1997	-999	Pentaclethra	macroloba	Fabaceae	2016	4.82	0.0051	44.72	2016	672	0.35	2895.78
A26	A2	P	1997	-999	Welfia	regia	Arecaceae	2013	0	0	0	2013	185	0.03	145.93
A26	A2	P	1997	-999	Welfia	regia	Arecaceae	2014	0	0	0	2014	185	0.03	145.93
A26	A2	P	1997	-999	Welfia	regia	Arecaceae	2015	0	0	0	2015	185	0.03	145.93
A26	A2	P	1997	-999	Welfia	regia	Arecaceae	2016	0	0	0	2016	185	0.03	145.93
A260	A2	A	1997	2016	Faramea	parvibractea	Rubiaceae	2013	0	0	0	2013	144	0.02	74.62
A260	A2	A	1997	2016	Faramea	parvibractea	Rubiaceae	2014	0	0	0	2014	144	0.02	74.62
A261	A2	P	1997	-999	Socratea	exorrhiza	Arecaceae	2013	0	0	0	2013	135	0.01	62.3
A261	A2	P	1997	-999	Socratea	exorrhiza	Arecaceae	2014	0	0	0	2014	135	0.01	62.3
A261	A2	P	1997	-999	Socratea	exorrhiza	Arecaceae	2015	0	0	0	2015	135	0.01	62.3
A261	A2	P	1997	-999	Socratea	exorrhiza	Arecaceae	2016	0	0	0	2016	135	0.01	62.3
A262	A2	A	1997	-999	Warszewiczia	coccinea	Rubiaceae	2013	0.97	0.00027	1.91	2013	179	0.03	133.94
A262	A2	A	1997	-999	Warszewiczia	coccinea	Rubiaceae	2014	0.95	0.00027	1.87	2014	180	0.03	135.9
A262	A2	A	1997	-999	Warszewiczia	coccinea	Rubiaceae	2015	1.06	0.0003	2.11	2015	181	0.03	137.88
A262	A2	A	1997	-999	Warszewiczia	coccinea	Rubiaceae	2016	1.93	0.00055	3.88	2016	182	0.03	139.87
A265	A2	A	1997	-999	Virola	sebifera	Myristicaceae	2013	11.68	0.00407	30.25	2013	216	0.04	216.37
A265	A2	A	1997	-999	Virola	sebifera	Myristicaceae	2014	11.35	0.00417	31.41	2014	228	0.04	247.45
A265	A2	A	1997	-999	Virola	sebifera	Myristicaceae	2015	13.75	0.00533	40.61	2015	240	0.05	280.67
A265	A2	A	1997	-999	Virola	sebifera	Myristicaceae	2016	6.74	0.00272	20.9	2016	253	0.05	319.05
A266	A2	A	1997	2016	Symplocos	striata	Symplocaceae	2013	0	0	0	2013	168	0.02	113.34
A266	A2	A	1997	2016	Symplocos	striata	Symplocaceae	2014	0	0	0	2014	168	0.02	113.34
A267	A2	A	1997	-999	Pouteria	torta	Sapotaceae	2013	2.92	0.00122	9.49	2013	265	0.06	356.71
A267	A2	A	1997	-999	Pouteria	torta	Sapotaceae	2014	0	0	0	2014	268	0.06	366.45
A267	A2	A	1997	-999	Pouteria	torta	Sapotaceae	2015	1.06	0.00045	3.47	2015	268	0.06	366.45
A267	A2	A	1997	-999	Pouteria	torta	Sapotaceae	2016	1.93	0.00082	6.36	2016	269	0.06	369.73
A268	A2	P	1997	-999	Welfia	regia	Arecaceae	2013	0	0	0	2013	183	0.03	141.88
A268	A2	P	1997	-999	Welfia	regia	Arecaceae	2014	0	0	0	2014	183	0.03	141.88
A268	A2	P	1997	-999	Welfia	regia	Arecaceae	2015	0	0	0	2015	183	0.03	141.88
A268	A2	P	1997	-999	Welfia	regia	Arecaceae	2016	0	0	0	2016	183	0.03	141.88
A27	A2	A	1997	-999	Tapirira	guianensis	Anacardiaceae	2013	0.97	0.0008	6.85	2013	522	0.21	1674.73
A27	A2	A	1997	-999	Tapirira	guianensis	Anacardiaceae	2014	4.73	0.0039	33.48	2014	523	0.21	1681.77
A27	A2	A	1997	-999	Tapirira	guianensis	Anacardiaceae	2015	3.17	0.00264	22.67	2015	528	0.22	1717.18
A27	A2	A	1997	-999	Tapirira	guianensis	Anacardiaceae	2016	7.7	0.00647	55.65	2016	531	0.22	1738.6
A270	A2	A	1997	-999	Virola	sebifera	Myristicaceae	2013	0	0	0	2013	153	0.02	88.14
A270	A2	A	1997	-999	Virola	sebifera	Myristicaceae	2014	0	0	0	2014	153	0.02	88.14
A270	A2	A	1997	-999	Virola	sebifera	Myristicaceae	2015	1.06	0.00026	1.67	2015	153	0.02	88.14
A270	A2	A	1997	-999	Virola	sebifera	Myristicaceae	2016	3.85	0.00094	6.22	2016	154	0.02	89.72
A271	A2	P	1997	-999	Socratea	exorrhiza	Arecaceae	2013	0	0	0	2013	131	0.01	57.2
A271	A2	P	1997	-999	Socratea	exorrhiza	Arecaceae	2014	0	0	0	2014	131	0.01	57.2
A271	A2	P	1997	-999	Socratea	exorrhiza	Arecaceae	2015	0	0	0	2015	131	0.01	57.2
A271	A2	P	1997	-999	Socratea	exorrhiza	Arecaceae	2016	0	0	0	2016	131	0.01	57.2
A272	A2	P	1997	-999	Socratea	exorrhiza	Arecaceae	2013	0	0	0	2013	104	0.01	29.02
A272	A2	P	1997	-999	Socratea	exorrhiza	Arecaceae	2014	0	0	0	2014	104	0.01	29.02
A272	A2	P	1997	-999	Socratea	exorrhiza	Arecaceae	2015	0	0	0	2015	104	0.01	29.02
A272	A2	P	1997	-999	Socratea	exorrhiza	Arecaceae	2016	0	0	0	2016	104	0.01	29.02
A273	A2	A	1997	-999	Faramea	parvibractea	Rubiaceae	2013	1.95	0.00041	2.51	2013	133	0.01	59.72
A273	A2	A	1997	-999	Faramea	parvibractea	Rubiaceae	2014	3.78	0.00081	5.04	2014	135	0.01	62.3
A273	A2	A	1997	-999	Faramea	parvibractea	Rubiaceae	2015	2.12	0.00047	2.91	2015	139	0.02	67.63
A273	A2	A	1997	-999	Faramea	parvibractea	Rubiaceae	2016	1.93	0.00043	2.71	2016	141	0.02	70.38
A275	A2	A	1997	-999	Balizia	elegans	Fabaceae	2013	13.63	0.01012	85.92	2013	466	0.17	1304.24
A275	A2	A	1997	-999	Balizia	elegans	Fabaceae	2014	10.4	0.00793	67.51	2014	480	0.18	1392.51
A275	A2	A	1997	-999	Balizia	elegans	Fabaceae	2015	11.64	0.00908	77.42	2015	491	0.19	1463.9
A275	A2	A	1997	-999	Balizia	elegans	Fabaceae	2016	11.56	0.00922	78.85	2016	502	0.2	1537.09
A276	A2	A	1997	-999	Quararibea	bracteolosa	Malvaceae	2013	5.84	0.00184	13.31	2013	198	0.03	173.74
A276	A2	A	1997	-999	Quararibea	bracteolosa	Malvaceae	2014	2.84	0.00092	6.66	2014	204	0.03	187.41
A276	A2	A	1997	-999	Quararibea	bracteolosa	Malvaceae	2015	4.23	0.00139	10.15	2015	207	0.03	194.45
A276	A2	A	1997	-999	Quararibea	bracteolosa	Malvaceae	2016	2.89	0.00096	7.08	2016	211	0.03	204.04
A278	A2	P	1997	-999	Welfia	regia	Arecaceae	2013	0	0	0	2013	141	0.02	70.38
A278	A2	P	1997	-999	Welfia	regia	Arecaceae	2014	0	0	0	2014	141	0.02	70.38
A278	A2	P	1997	-999	Welfia	regia	Arecaceae	2015	0	0	0	2015	141	0.02	70.38
A278	A2	P	1997	-999	Welfia	regia	Arecaceae	2016	0	0	0	2016	141	0.02	70.38
A279	A2	A	1997	-999	Tapirira	guianensis	Anacardiaceae	2013	7.79	0.00265	19.59	2013	213	0.04	208.93
A279	A2	A	1997	-999	Tapirira	guianensis	Anacardiaceae	2014	8.51	0.00301	22.49	2014	221	0.04	229.06
A279	A2	A	1997	-999	Tapirira	guianensis	Anacardiaceae	2015	5.29	0.00193	14.52	2015	230	0.04	252.84
A279	A2	A	1997	-999	Tapirira	guianensis	Anacardiaceae	2016	9.63	0.00363	27.51	2016	235	0.04	266.57
A28	A2	P	1997	-999	Socratea	exorrhiza	Arecaceae	2013	0	0	0	2013	123	0.01	47.73
A28	A2	P	1997	-999	Socratea	exorrhiza	Arecaceae	2014	0	0	0	2014	123	0.01	47.73
A28	A2	P	1997	-999	Socratea	exorrhiza	Arecaceae	2015	0	0	0	2015	123	0.01	47.73
A28	A2	P	1997	-999	Socratea	exorrhiza	Arecaceae	2016	0	0	0	2016	123	0.01	47.73
A280	A2	P	1997	-999	Socratea	exorrhiza	Arecaceae	2013	0	0	0	2013	109	0.01	33.43
A280	A2	P	1997	-999	Socratea	exorrhiza	Arecaceae	2014	0	0	0	2014	109	0.01	33.43
A280	A2	P	1997	-999	Socratea	exorrhiza	Arecaceae	2015	0	0	0	2015	109	0.01	33.43
A280	A2	P	1997	-999	Socratea	exorrhiza	Arecaceae	2016	0	0	0	2016	109	0.01	33.43
A281	A2	P	1997	-999	Socratea	exorrhiza	Arecaceae	2013	0	0	0	2013	138	0.01	66.27
A281	A2	P	1997	-999	Socratea	exorrhiza	Arecaceae	2014	0	0	0	2014	138	0.01	66.27
A281	A2	P	1997	-999	Socratea	exorrhiza	Arecaceae	2015	0	0	0	2015	138	0.01	66.27
A281	A2	P	1997	-999	Socratea	exorrhiza	Arecaceae	2016	0	0	0	2016	138	0.01	66.27
A282	A2	A	1997	-999	Dendropanax	arboreus	Araliaceae	2013	4.87	0.00173	12.93	2013	224	0.04	236.85
A282	A2	A	1997	-999	Dendropanax	arboreus	Araliaceae	2014	7.56	0.00277	20.83	2014	229	0.04	250.14
A282	A2	A	1997	-999	Dendropanax	arboreus	Araliaceae	2015	5.29	0.00199	15.07	2015	237	0.04	272.16
A282	A2	A	1997	-999	Dendropanax	arboreus	Araliaceae	2016	3.85	0.00148	11.23	2016	242	0.05	286.41
A286	A2	A	1997	-999	Pentaclethra	macroloba	Fabaceae	2013	0	0	0	2013	509	0.2	1584.59
A286	A2	A	1997	-999	Pentaclethra	macroloba	Fabaceae	2014	0.95	0.00076	6.47	2014	509	0.2	1584.59
A286	A2	A	1997	-999	Pentaclethra	macroloba	Fabaceae	2015	3.17	0.00255	21.82	2015	510	0.2	1591.43
A286	A2	A	1997	-999	Pentaclethra	macroloba	Fabaceae	2016	0.96	0.00078	6.65	2016	513	0.21	1612.06
A287	A2	A	1997	2017	Anaxagorea	crassipetala	Annonaceae	2013	0	0	0	2013	121	0.01	45.51
A287	A2	A	1997	2017	Anaxagorea	crassipetala	Annonaceae	2014	0	0	0	2014	121	0.01	45.51
A287	A2	A	1997	2017	Anaxagorea	crassipetala	Annonaceae	2015	0	0	0	2015	121	0.01	45.51
A288	A2	A	1997	-999	Minquartia	guianensis	Coulaceae	2013	1.95	0.00046	3	2013	150	0.02	83.5
A288	A2	A	1997	-999	Minquartia	guianensis	Coulaceae	2014	0	0	0	2014	152	0.02	86.58
A288	A2	A	1997	-999	Minquartia	guianensis	Coulaceae	2015	0	0	0	2015	152	0.02	86.58
A288	A2	A	1997	-999	Minquartia	guianensis	Coulaceae	2016	0.96	0.00023	1.5	2016	152	0.02	86.58
A289	A2	A	1997	-999	Pentaclethra	macroloba	Fabaceae	2013	0	0	0	2013	254	0.05	322.11
A289	A2	A	1997	-999	Pentaclethra	macroloba	Fabaceae	2014	0	0	0	2014	254	0.05	322.11
A289	A2	A	1997	-999	Pentaclethra	macroloba	Fabaceae	2015	1.06	0.00042	3.25	2015	254	0.05	322.11
A289	A2	A	1997	-999	Pentaclethra	macroloba	Fabaceae	2016	0	0	0	2016	255	0.05	325.18
A290	A2	A	1997	-999	Inga	leiocalycina	Fabaceae	2013	2.92	0.00135	10.65	2013	292	0.07	449.22
A290	A2	A	1997	-999	Inga	leiocalycina	Fabaceae	2014	5.67	0.00266	21.08	2014	295	0.07	460.17
A290	A2	A	1997	-999	Inga	leiocalycina	Fabaceae	2015	15.87	0.00769	61.42	2015	301	0.07	482.46
A290	A2	A	1997	-999	Inga	leiocalycina	Fabaceae	2016	9.63	0.00486	39.06	2016	316	0.08	540.52
A291	A2	P	1997	-999	Socratea	exorrhiza	Arecaceae	2013	0	0	0	2013	125	0.01	50.01
A291	A2	P	1997	-999	Socratea	exorrhiza	Arecaceae	2014	0	0	0	2014	125	0.01	50.01
A291	A2	P	1997	-999	Socratea	exorrhiza	Arecaceae	2015	0	0	0	2015	125	0.01	50.01
A291	A2	P	1997	-999	Socratea	exorrhiza	Arecaceae	2016	0	0	0	2016	125	0.01	50.01
A292	A2	A	1997	-999	Neea	amplifolia	Nyctaginaceae	2013	0	0	0	2013	139	0.02	67.63
A292	A2	A	1997	-999	Neea	amplifolia	Nyctaginaceae	2014	0	0	0	2014	139	0.02	67.63
A292	A2	A	1997	-999	Neea	amplifolia	Nyctaginaceae	2015	0	0	0	2015	139	0.02	67.63
A292	A2	A	1997	-999	Neea	amplifolia	Nyctaginaceae	2016	0	0	0	2016	139	0.02	67.63
A293	A2	P	1997	-999	Socratea	exorrhiza	Arecaceae	2013	0	0	0	2013	114	0.01	38.2
A293	A2	P	1997	-999	Socratea	exorrhiza	Arecaceae	2014	0	0	0	2014	114	0.01	38.2
A293	A2	P	1997	-999	Socratea	exorrhiza	Arecaceae	2015	0	0	0	2015	114	0.01	38.2
A293	A2	P	1997	-999	Socratea	exorrhiza	Arecaceae	2016	0	0	0	2016	114	0.01	38.2
A295	A2	P	1997	-999	Socratea	exorrhiza	Arecaceae	2013	0	0	0	2013	121	0.01	45.51
A295	A2	P	1997	-999	Socratea	exorrhiza	Arecaceae	2014	0	0	0	2014	121	0.01	45.51
A295	A2	P	1997	-999	Socratea	exorrhiza	Arecaceae	2015	0	0	0	2015	121	0.01	45.51
A295	A2	P	1997	-999	Socratea	exorrhiza	Arecaceae	2016	0	0	0	2016	121	0.01	45.51
A296	A2	A	1997	-999	Casearia	arborea	Salicaceae	2013	1.95	0.00094	7.52	2013	307	0.07	505.28
A296	A2	A	1997	-999	Casearia	arborea	Salicaceae	2014	0.95	0.00046	3.67	2014	309	0.07	513.01
A296	A2	A	1997	-999	Casearia	arborea	Salicaceae	2015	2.12	0.00103	8.27	2015	310	0.08	516.89
A296	A2	A	1997	-999	Casearia	arborea	Salicaceae	2016	0.96	0.00047	3.78	2016	312	0.08	524.71
A297	A2	A	1997	-999	Cespedesia	spathulata	Ochnaceae	2013	0.97	0.00074	6.33	2013	486	0.19	1431.23
A297	A2	A	1997	-999	Cespedesia	spathulata	Ochnaceae	2014	2.84	0.00218	18.54	2014	487	0.19	1437.74
A297	A2	A	1997	-999	Cespedesia	spathulata	Ochnaceae	2015	3.17	0.00245	20.88	2015	490	0.19	1457.34
A297	A2	A	1997	-999	Cespedesia	spathulata	Ochnaceae	2016	1.93	0.00149	12.74	2016	493	0.19	1477.08
A298	A2	A	1997	-999	Quiina	macrophylla	Ochnaceae	2013	0.97	0.00023	1.51	2013	151	0.02	85.03
A298	A2	A	1997	-999	Quiina	macrophylla	Ochnaceae	2014	0	0	0	2014	152	0.02	86.58
A298	A2	A	1997	-999	Quiina	macrophylla	Ochnaceae	2015	1.06	0.00025	1.65	2015	152	0.02	86.58
A298	A2	A	1997	-999	Quiina	macrophylla	Ochnaceae	2016	0.96	0.00023	1.52	2016	153	0.02	88.14
A299	A2	A	1997	-999	Pentaclethra	macroloba	Fabaceae	2013	2.92	0.00278	24.18	2013	605	0.29	2309.23
A299	A2	A	1997	-999	Pentaclethra	macroloba	Fabaceae	2014	3.78	0.00362	31.52	2014	608	0.29	2334.07
A299	A2	A	1997	-999	Pentaclethra	macroloba	Fabaceae	2015	3.17	0.00306	26.61	2015	612	0.29	2367.4
A299	A2	A	1997	-999	Pentaclethra	macroloba	Fabaceae	2016	3.85	0.00373	32.5	2016	615	0.3	2392.55
A31	A3	P	1997	-999	Welfia	regia	Arecaceae	2013	0	0	0	2013	185	0.03	145.93
A31	A3	P	1997	-999	Welfia	regia	Arecaceae	2014	0	0	0	2014	185	0.03	145.93
A31	A3	P	1997	-999	Welfia	regia	Arecaceae	2015	0	0	0	2015	185	0.03	145.93
A31	A3	P	1997	-999	Welfia	regia	Arecaceae	2016	0	0	0	2016	185	0.03	145.93
A310	A3	A	1997	-999	Naucleopsis	naga	Moraceae	2013	0	0	0	2013	153	0.02	88.14
A310	A3	A	1997	-999	Naucleopsis	naga	Moraceae	2014	0	0	0	2014	153	0.02	88.14
A310	A3	A	1997	-999	Naucleopsis	naga	Moraceae	2015	0	0	0	2015	153	0.02	88.14
A310	A3	A	1997	-999	Naucleopsis	naga	Moraceae	2016	0	0	0	2016	153	0.02	88.14
A3100	A3	A	1997	-999	Rauvolfia	purpurascens	Apocynaceae	2013	0.98	0.00022	1.34	2013	139	0.02	67.63
A3100	A3	A	1997	-999	Rauvolfia	purpurascens	Apocynaceae	2014	0.95	0.00021	1.32	2014	140	0.02	69
A3100	A3	A	1997	-999	Rauvolfia	purpurascens	Apocynaceae	2015	0	0	0	2015	141	0.02	70.38
A3100	A3	A	1997	-999	Rauvolfia	purpurascens	Apocynaceae	2016	0.95	0.00021	1.33	2016	141	0.02	70.38
A3101	A3	P	1997	-999	Welfia	regia	Arecaceae	2013	0	0	0	2013	169	0.02	115.14
A3101	A3	P	1997	-999	Welfia	regia	Arecaceae	2014	0	0	0	2014	169	0.02	115.14
A3101	A3	P	1997	-999	Welfia	regia	Arecaceae	2015	0	0	0	2015	169	0.02	115.14
A3101	A3	P	1997	-999	Welfia	regia	Arecaceae	2016	0	0	0	2016	169	0.02	115.14
A3102	A3	A	1997	-999	Protium	panamense	Burseraceae	2013	0	0	0	2013	285	0.06	424.2
A3102	A3	A	1997	-999	Protium	panamense	Burseraceae	2014	0.95	0.00043	3.36	2014	285	0.06	424.2
A3102	A3	A	1997	-999	Protium	panamense	Burseraceae	2015	1.04	0.00047	3.68	2015	286	0.06	427.73
A3102	A3	A	1997	-999	Protium	panamense	Burseraceae	2016	0.95	0.00043	3.39	2016	287	0.06	431.28
A3104	A3	A	1997	-999	Guarea	rhopalocarpa	Meliaceae	2013	0	0	0	2013	160	0.02	99.49
A3104	A3	A	1997	-999	Guarea	rhopalocarpa	Meliaceae	2014	0	0	0	2014	160	0.02	99.49
A3104	A3	A	1997	-999	Guarea	rhopalocarpa	Meliaceae	2015	0	0	0	2015	160	0.02	99.49
A3104	A3	A	1997	-999	Guarea	rhopalocarpa	Meliaceae	2016	0.95	0.00024	1.6	2016	160	0.02	99.49
A3105	A3	A	1997	-999	Virola	koschnyi	Myristicaceae	2013	0	0	0	2013	169	0.02	115.14
A3105	A3	A	1997	-999	Virola	koschnyi	Myristicaceae	2014	0.95	0.00025	1.72	2014	169	0.02	115.14
A3105	A3	A	1997	-999	Virola	koschnyi	Myristicaceae	2015	0	0	0	2015	170	0.02	116.96
A3105	A3	A	1997	-999	Virola	koschnyi	Myristicaceae	2016	0	0	0	2016	170	0.02	116.96
A3106	A3	P	1997	-999	Socratea	exorrhiza	Arecaceae	2013	0	0	0	2013	128	0.01	53.54
A3106	A3	P	1997	-999	Socratea	exorrhiza	Arecaceae	2014	0	0	0	2014	128	0.01	53.54
A3106	A3	P	1997	-999	Socratea	exorrhiza	Arecaceae	2015	0	0	0	2015	128	0.01	53.54
A3106	A3	P	1997	-999	Socratea	exorrhiza	Arecaceae	2016	0	0	0	2016	128	0.01	53.54
A3107	A3	A	1997	-999	Goethalsia	meiantha	Malvaceae	2013	0.98	0.00058	4.77	2013	375	0.11	801.18
A3107	A3	A	1997	-999	Goethalsia	meiantha	Malvaceae	2014	0.95	0.00056	4.64	2014	376	0.11	806.05
A3107	A3	A	1997	-999	Goethalsia	meiantha	Malvaceae	2015	1.04	0.00061	5.07	2015	377	0.11	810.92
A3107	A3	A	1997	-999	Goethalsia	meiantha	Malvaceae	2016	0.95	0.00057	4.68	2016	378	0.11	815.82
A3108	A3	A	1997	-999	Goethalsia	meiantha	Malvaceae	2013	6.87	0.00554	47.42	2013	510	0.2	1591.43
A3108	A3	A	1997	-999	Goethalsia	meiantha	Malvaceae	2014	10.46	0.00858	73.58	2014	517	0.21	1639.77
A3108	A3	A	1997	-999	Goethalsia	meiantha	Malvaceae	2015	7.26	0.00606	52.05	2015	528	0.22	1717.18
A3108	A3	A	1997	-999	Goethalsia	meiantha	Malvaceae	2016	3.81	0.00322	27.65	2016	535	0.22	1767.38
A3109	A3	A	1997	-999	Warszewiczia	coccinea	Rubiaceae	2013	1.96	0.00058	4.07	2013	186	0.03	147.98
A3109	A3	A	1997	-999	Warszewiczia	coccinea	Rubiaceae	2014	0.95	0.00028	1.99	2014	188	0.03	152.13
A3109	A3	A	1997	-999	Warszewiczia	coccinea	Rubiaceae	2015	2.07	0.00062	4.39	2015	189	0.03	154.22
A3109	A3	A	1997	-999	Warszewiczia	coccinea	Rubiaceae	2016	1.91	0.00057	4.09	2016	191	0.03	158.45
A311	A3	A	1997	-999	Pterocarpus	sp. A	Fabaceae	2013	3.92	0.00227	18.7	2013	367	0.11	762.82
A311	A3	A	1997	-999	Pterocarpus	sp. A	Fabaceae	2014	1.9	0.00111	9.14	2014	371	0.11	781.88
A311	A3	A	1997	-999	Pterocarpus	sp. A	Fabaceae	2015	6.22	0.00367	30.3	2015	373	0.11	791.5
A311	A3	A	1997	-999	Pterocarpus	sp. A	Fabaceae	2016	3.81	0.00228	18.84	2016	379	0.11	820.72
A3111	A3	A	1997	-999	Pentaclethra	macroloba	Fabaceae	2013	0	0	0	2013	547	0.23	1855.11
A3111	A3	A	1997	-999	Pentaclethra	macroloba	Fabaceae	2014	0	0	0	2014	547	0.23	1855.11
A3111	A3	A	1997	-999	Pentaclethra	macroloba	Fabaceae	2015	2.04	0.00176	15.16	2015	547	0.23	1855.11
A3111	A3	A	1997	-999	Pentaclethra	macroloba	Fabaceae	2016	2.9	0.0025	21.59	2016	549	0.24	1869.94
A3112	A3	A	1997	-999	Dendropanax	arboreus	Araliaceae	2013	3.92	0.00229	18.82	2013	369	0.11	772.32
A3112	A3	A	1997	-999	Dendropanax	arboreus	Araliaceae	2014	3.8	0.00224	18.46	2014	373	0.11	791.5
A3112	A3	A	1997	-999	Dendropanax	arboreus	Araliaceae	2015	4.09	0.00243	20.1	2015	377	0.11	810.92
A3112	A3	A	1997	-999	Dendropanax	arboreus	Araliaceae	2016	1.93	0.00116	9.58	2016	381	0.11	830.58
A3113	A3	A	1997	2016	Dendropanax	arboreus	Araliaceae	2013	2.95	0.00086	6.05	2013	184	0.03	143.9
A3113	A3	A	1997	2016	Dendropanax	arboreus	Araliaceae	2014	0	0	0	2014	187	0.03	150.05
A3114	A3	A	1997	-999	Jacaratia	dolichaula	Caricaceae	2013	2.95	0.00052	2.86	2013	111	0.01	35.29
A3114	A3	A	1997	-999	Jacaratia	dolichaula	Caricaceae	2014	2.84	0.00052	2.88	2014	114	0.01	38.2
A3114	A3	A	1997	-999	Jacaratia	dolichaula	Caricaceae	2015	2.05	0.00038	2.16	2015	117	0.01	41.25
A3114	A3	A	1997	-999	Jacaratia	dolichaula	Caricaceae	2016	6.76	0.0013	7.55	2016	119	0.01	43.35
A3115	A3	A	1997	-999	Ormosia	intermedia	Fabaceae	2013	7.85	0.00217	14.99	2013	172	0.02	120.63
A3115	A3	A	1997	-999	Ormosia	intermedia	Fabaceae	2014	6.65	0.00192	13.44	2014	180	0.03	135.9
A3115	A3	A	1997	-999	Ormosia	intermedia	Fabaceae	2015	5.13	0.00153	10.81	2015	187	0.03	150.05
A3115	A3	A	1997	-999	Ormosia	intermedia	Fabaceae	2016	4.83	0.00148	10.54	2016	192	0.03	160.59
A3118	A3	A	1997	-999	Pentaclethra	macroloba	Fabaceae	2013	4.91	0.0026	21.09	2013	335	0.09	618.84
A3118	A3	A	1997	-999	Pentaclethra	macroloba	Fabaceae	2014	9.51	0.00515	41.92	2014	340	0.09	640.34
A3118	A3	A	1997	-999	Pentaclethra	macroloba	Fabaceae	2015	6.15	0.00341	27.86	2015	350	0.1	684.44
A3118	A3	A	1997	-999	Pentaclethra	macroloba	Fabaceae	2016	9.66	0.00548	44.88	2016	356	0.1	711.62
A312	A3	A	1997	-999	Pouteria	durlandii	Sapotaceae	2013	0	0	0	2013	117	0.01	41.25
A312	A3	A	1997	-999	Pouteria	durlandii	Sapotaceae	2014	0	0	0	2014	117	0.01	41.25
A312	A3	A	1997	-999	Pouteria	durlandii	Sapotaceae	2015	0	0	0	2015	117	0.01	41.25
A312	A3	A	1997	-999	Pouteria	durlandii	Sapotaceae	2016	0	0	0	2016	117	0.01	41.25
A3120	A3	A	1997	-999	Pentaclethra	macroloba	Fabaceae	2013	6.87	0.00583	50.17	2013	537	0.23	1781.85
A3120	A3	A	1997	-999	Pentaclethra	macroloba	Fabaceae	2014	7.6	0.00655	56.39	2014	544	0.23	1832.98
A3120	A3	A	1997	-999	Pentaclethra	macroloba	Fabaceae	2015	5.13	0.00447	38.51	2015	552	0.24	1892.3
A3120	A3	A	1997	-999	Pentaclethra	macroloba	Fabaceae	2016	3.86	0.00339	29.27	2016	557	0.24	1929.86
A3121	A3	L	1997	-999	Pinzona	coriacea	Dilleniaceae	2013	0	0	0	2013	208	0.03	196.83
A3121	A3	L	1997	-999	Pinzona	coriacea	Dilleniaceae	2014	0.95	0.00031	2.27	2014	208	0.03	196.83
A3121	A3	L	1997	-999	Pinzona	coriacea	Dilleniaceae	2015	1.03	0.00034	2.47	2015	209	0.03	199.22
A3121	A3	L	1997	-999	Pinzona	coriacea	Dilleniaceae	2016	0.96	0.00032	2.33	2016	210	0.03	201.62
A3122	A3	P	1997	-999	Welfia	regia	Arecaceae	2013	0	0	0	2013	204	0.03	187.41
A3122	A3	P	1997	-999	Welfia	regia	Arecaceae	2014	0	0	0	2014	204	0.03	187.41
A3122	A3	P	1997	-999	Welfia	regia	Arecaceae	2015	0	0	0	2015	204	0.03	187.41
A3122	A3	P	1997	-999	Welfia	regia	Arecaceae	2016	0	0	0	2016	204	0.03	187.41
A3123	A3	A	1997	-999	Preslianthus	pittieri	Capparaceae	2013	0	0	0	2013	153	0.02	88.14
A3123	A3	A	1997	-999	Preslianthus	pittieri	Capparaceae	2014	0	0	0	2014	153	0.02	88.14
A3123	A3	A	1997	-999	Preslianthus	pittieri	Capparaceae	2015	0	0	0	2015	153	0.02	88.14
A3123	A3	A	1997	-999	Preslianthus	pittieri	Capparaceae	2016	0	0	0	2016	153	0.02	88.14
A3124	A3	A	1997	-999	Goethalsia	meiantha	Malvaceae	2013	4.91	0.00319	26.68	2013	412	0.13	990.94
A3124	A3	A	1997	-999	Goethalsia	meiantha	Malvaceae	2014	3.8	0.0025	20.93	2014	417	0.14	1018.14
A3124	A3	A	1997	-999	Goethalsia	meiantha	Malvaceae	2015	2.05	0.00136	11.38	2015	421	0.14	1040.16
A3124	A3	A	1997	-999	Goethalsia	meiantha	Malvaceae	2016	0.96	0.00064	5.37	2016	423	0.14	1051.26
A3125	A3	A	1997	-999	Warszewiczia	coccinea	Rubiaceae	2013	0.98	0.00031	2.23	2013	200	0.03	178.24
A3125	A3	A	1997	-999	Warszewiczia	coccinea	Rubiaceae	2014	0	0	0	2014	201	0.03	180.51
A3125	A3	A	1997	-999	Warszewiczia	coccinea	Rubiaceae	2015	1.03	0.00032	2.34	2015	201	0.03	180.51
A3125	A3	A	1997	-999	Warszewiczia	coccinea	Rubiaceae	2016	2.89	0.00092	6.69	2016	202	0.03	182.8
A3128	A3	A	1997	-999	Pentaclethra	macroloba	Fabaceae	2013	1.96	0.0006	4.3	2013	194	0.03	164.92
A3128	A3	A	1997	-999	Pentaclethra	macroloba	Fabaceae	2014	0	0	0	2014	196	0.03	169.3
A3128	A3	A	1997	-999	Pentaclethra	macroloba	Fabaceae	2015	0	0	0	2015	196	0.03	169.3
A3128	A3	A	1997	-999	Pentaclethra	macroloba	Fabaceae	2016	0	0	0	2016	196	0.03	169.3
A313	A3	A	1997	-999	Heisteria	concinna	Erythropalaceae	2013	0	0	0	2013	154	0.02	89.72
A313	A3	A	1997	-999	Heisteria	concinna	Erythropalaceae	2014	0.95	0.00023	1.51	2014	154	0.02	89.72
A313	A3	A	1997	-999	Heisteria	concinna	Erythropalaceae	2015	3.11	0.00076	5.04	2015	155	0.02	91.31
A313	A3	A	1997	-999	Heisteria	concinna	Erythropalaceae	2016	0	0	0	2016	158	0.02	96.17
A3130	A3	A	1997	-999	Pentaclethra	macroloba	Fabaceae	2013	8.83	0.00741	63.72	2013	530	0.22	1731.45
A3130	A3	A	1997	-999	Pentaclethra	macroloba	Fabaceae	2014	10.46	0.00894	76.99	2014	539	0.23	1796.39
A3130	A3	A	1997	-999	Pentaclethra	macroloba	Fabaceae	2015	7.18	0.00624	53.8	2015	550	0.24	1877.38
A3130	A3	A	1997	-999	Pentaclethra	macroloba	Fabaceae	2016	6.74	0.00594	51.24	2016	557	0.24	1929.86
A3131	A3	A	1997	-999	Sloanea	geniculata	Elaeocarpaceae	2013	0	0	0	2013	126	0.01	51.17
A3131	A3	A	1997	-999	Sloanea	geniculata	Elaeocarpaceae	2014	0	0	0	2014	126	0.01	51.17
A3131	A3	A	1997	-999	Sloanea	geniculata	Elaeocarpaceae	2015	0	0	0	2015	126	0.01	51.17
A3131	A3	A	1997	-999	Sloanea	geniculata	Elaeocarpaceae	2016	0	0	0	2016	126	0.01	51.17
A3133	A3	A	1997	-999	Dendropanax	arboreus	Araliaceae	2013	0	0	0	2013	387	0.12	860.51
A3133	A3	A	1997	-999	Dendropanax	arboreus	Araliaceae	2014	1.9	0.00116	9.59	2014	387	0.12	860.51
A3133	A3	A	1997	-999	Dendropanax	arboreus	Araliaceae	2015	0	0	0	2015	389	0.12	870.6
A3133	A3	A	1997	-999	Dendropanax	arboreus	Araliaceae	2016	0	0	0	2016	389	0.12	870.6
A3135	A3	P	1997	-999	Iriartea	deltoidea	Arecaceae	2013	0.98	0.00032	2.35	2013	208	0.03	196.83
A3135	A3	P	1997	-999	Iriartea	deltoidea	Arecaceae	2014	0	0	0	2014	209	0.03	199.22
A3135	A3	P	1997	-999	Iriartea	deltoidea	Arecaceae	2015	0	0	0	2015	209	0.03	199.22
A3135	A3	P	1997	-999	Iriartea	deltoidea	Arecaceae	2016	0	0	0	2016	209	0.03	199.22
A3136	A3	A	1997	-999	Laetia	procera	Salicaceae	2013	5.89	0.00141	9.24	2013	150	0.02	83.5
A3136	A3	A	1997	-999	Laetia	procera	Salicaceae	2014	1.9	0.00047	3.1	2014	156	0.02	92.92
A3136	A3	A	1997	-999	Laetia	procera	Salicaceae	2015	2.05	0.00051	3.4	2015	158	0.02	96.17
A3136	A3	A	1997	-999	Laetia	procera	Salicaceae	2016	4.82	0.00123	8.23	2016	160	0.02	99.49
A3137	A3	P	1997	-999	Welfia	regia	Arecaceae	2013	0	0	0	2013	173	0.02	122.48
A3137	A3	P	1997	-999	Welfia	regia	Arecaceae	2014	0	0	0	2014	173	0.02	122.48
A3137	A3	P	1997	-999	Welfia	regia	Arecaceae	2015	0	0	0	2015	173	0.02	122.48
A3137	A3	P	1997	-999	Welfia	regia	Arecaceae	2016	0	0	0	2016	173	0.02	122.48
A314	A3	A	1997	-999	Protium	pittieri	Burseraceae	2013	0.98	0.00042	3.26	2013	271	0.06	376.33
A314	A3	A	1997	-999	Protium	pittieri	Burseraceae	2014	1.9	0.00082	6.36	2014	272	0.06	379.66
A314	A3	A	1997	-999	Protium	pittieri	Burseraceae	2015	1.04	0.00045	3.49	2015	274	0.06	386.35
A314	A3	A	1997	-999	Protium	pittieri	Burseraceae	2016	1.91	0.00083	6.46	2016	275	0.06	389.71
A3140	A3	A	1997	-999	Protium	confusum	Burseraceae	2013	0.98	0.00017	0.94	2013	111	0.01	35.29
A3140	A3	A	1997	-999	Protium	confusum	Burseraceae	2014	0	0	0	2014	112	0.01	36.25
A3140	A3	A	1997	-999	Protium	confusum	Burseraceae	2015	0	0	0	2015	112	0.01	36.25
A3140	A3	A	1997	-999	Protium	confusum	Burseraceae	2016	0	0	0	2016	112	0.01	36.25
A3142	A3	A	1997	-999	Pouteria	calistophylla	Sapotaceae	2013	2.94	0.00144	11.52	2013	310	0.08	516.89
A3142	A3	A	1997	-999	Pouteria	calistophylla	Sapotaceae	2014	4.75	0.00236	18.89	2014	313	0.08	528.64
A3142	A3	A	1997	-999	Pouteria	calistophylla	Sapotaceae	2015	0	0	0	2015	318	0.08	548.51
A3142	A3	A	1997	-999	Pouteria	calistophylla	Sapotaceae	2016	0	0	0	2016	318	0.08	548.51
A3143	A3	A	1997	-999	Casearia	commersoniana	Salicaceae	2013	0	0	0	2013	226	0.04	242.12
A3143	A3	A	1997	-999	Casearia	commersoniana	Salicaceae	2014	0.95	0.00034	2.53	2014	226	0.04	242.12
A3143	A3	A	1997	-999	Casearia	commersoniana	Salicaceae	2015	0	0	0	2015	227	0.04	244.78
A3143	A3	A	1997	-999	Casearia	commersoniana	Salicaceae	2016	0	0	0	2016	227	0.04	244.78
A3144	A3	A	1997	-999	Drypetes	standleyi	Putranjivaceae	2013	0	0	0	2013	175	0.02	126.24
A3144	A3	A	1997	-999	Drypetes	standleyi	Putranjivaceae	2014	0	0	0	2014	175	0.02	126.24
A3144	A3	A	1997	-999	Drypetes	standleyi	Putranjivaceae	2015	0	0	0	2015	175	0.02	126.24
A3144	A3	A	1997	-999	Drypetes	standleyi	Putranjivaceae	2016	0	0	0	2016	175	0.02	126.24
A3146	A3	A	1997	-999	Pouteria	calistophylla	Sapotaceae	2013	0.98	0.00023	1.49	2013	149	0.02	81.98
A3146	A3	A	1997	-999	Pouteria	calistophylla	Sapotaceae	2014	0	0	0	2014	150	0.02	83.5
A3146	A3	A	1997	-999	Pouteria	calistophylla	Sapotaceae	2015	0	0	0	2015	150	0.02	83.5
A3146	A3	A	1997	-999	Pouteria	calistophylla	Sapotaceae	2016	0	0	0	2016	150	0.02	83.5
A3147	A3	A	1997	-999	Pentaclethra	macroloba	Fabaceae	2013	7.85	0.00851	74.7	2013	686	0.37	3026.73
A3147	A3	A	1997	-999	Pentaclethra	macroloba	Fabaceae	2014	10.46	0.01149	100.97	2014	694	0.38	3102.87
A3147	A3	A	1997	-999	Pentaclethra	macroloba	Fabaceae	2015	8.2	0.00913	80.36	2015	705	0.39	3209.1
A3147	A3	A	1997	-999	Pentaclethra	macroloba	Fabaceae	2016	4.82	0.00541	47.64	2016	713	0.4	3287.48
A3148	A3	P	1997	-999	Socratea	exorrhiza	Arecaceae	2013	0	0	0	2013	142	0.02	71.78
A3148	A3	P	1997	-999	Socratea	exorrhiza	Arecaceae	2014	0	0	0	2014	142	0.02	71.78
A3148	A3	P	1997	-999	Socratea	exorrhiza	Arecaceae	2015	0	0	0	2015	142	0.02	71.78
A3148	A3	P	1997	-999	Socratea	exorrhiza	Arecaceae	2016	0	0	0	2016	142	0.02	71.78
A3149	A3	A	1997	2016	Annona	subnubila	Annonaceae	2013	0	0	0	2013	118	0.01	42.29
A3149	A3	A	1997	2016	Annona	subnubila	Annonaceae	2014	0	0	0	2014	118	0.01	42.29
A315	A3	A	1997	-999	Laetia	procera	Salicaceae	2013	4.91	0.00364	30.9	2013	470	0.17	1329.17
A315	A3	A	1997	-999	Laetia	procera	Salicaceae	2014	3.8	0.00285	24.2	2014	475	0.18	1360.65
A315	A3	A	1997	-999	Laetia	procera	Salicaceae	2015	5.18	0.00392	33.34	2015	479	0.18	1386.11
A315	A3	A	1997	-999	Laetia	procera	Salicaceae	2016	3.81	0.00291	24.77	2016	484	0.18	1418.27
A3150	A3	A	1997	-999	Warszewiczia	coccinea	Rubiaceae	2013	0	0	0	2013	115	0.01	39.2
A3150	A3	A	1997	-999	Warszewiczia	coccinea	Rubiaceae	2014	0.95	0.00017	0.96	2014	115	0.01	39.2
A3150	A3	A	1997	-999	Warszewiczia	coccinea	Rubiaceae	2015	1.03	0.00019	1.05	2015	116	0.01	40.22
A3150	A3	A	1997	-999	Warszewiczia	coccinea	Rubiaceae	2016	0.96	0.00018	1.01	2016	117	0.01	41.25
A3151	A3	A	1997	-999	Ocotea	cernua	Lauraceae	2013	4.91	0.00152	10.93	2013	195	0.03	167.1
A3151	A3	A	1997	-999	Ocotea	cernua	Lauraceae	2014	2.85	0.0009	6.52	2014	200	0.03	178.24
A3151	A3	A	1997	-999	Ocotea	cernua	Lauraceae	2015	0	0	0	2015	203	0.03	185.1
A3151	A3	A	1997	-999	Ocotea	cernua	Lauraceae	2016	1.93	0.00062	4.48	2016	203	0.03	185.1
A3152	A3	P	1997	-999	Socratea	exorrhiza	Arecaceae	2013	0	0	0	2013	137	0.01	64.93
A3152	A3	P	1997	-999	Socratea	exorrhiza	Arecaceae	2014	0	0	0	2014	137	0.01	64.93
A3152	A3	P	1997	-999	Socratea	exorrhiza	Arecaceae	2015	0	0	0	2015	137	0.01	64.93
A3152	A3	P	1997	-999	Socratea	exorrhiza	Arecaceae	2016	0	0	0	2016	137	0.01	64.93
A3153	A3	A	1997	-999	Warszewiczia	coccinea	Rubiaceae	2013	0.98	0.00026	1.81	2013	171	0.02	118.78
A3153	A3	A	1997	-999	Warszewiczia	coccinea	Rubiaceae	2014	0	0	0	2014	172	0.02	120.63
A3153	A3	A	1997	-999	Warszewiczia	coccinea	Rubiaceae	2015	1.03	0.00028	1.9	2015	172	0.02	120.63
A3153	A3	A	1997	-999	Warszewiczia	coccinea	Rubiaceae	2016	1.93	0.00053	3.62	2016	173	0.02	122.48
A3154	A3	P	1997	-999	Socratea	exorrhiza	Arecaceae	2013	0	0	0	2013	143	0.02	73.19
A3154	A3	P	1997	-999	Socratea	exorrhiza	Arecaceae	2014	0	0	0	2014	143	0.02	73.19
A3154	A3	P	1997	-999	Socratea	exorrhiza	Arecaceae	2015	0	0	0	2015	143	0.02	73.19
A3154	A3	P	1997	-999	Socratea	exorrhiza	Arecaceae	2016	0	0	0	2016	143	0.02	73.19
A3155	A3	A	1997	-999	Rauvolfia	purpurascens	Apocynaceae	2013	0	0	0	2013	200	0.03	178.24
A3155	A3	A	1997	-999	Rauvolfia	purpurascens	Apocynaceae	2014	0	0	0	2014	200	0.03	178.24
A3155	A3	A	1997	-999	Rauvolfia	purpurascens	Apocynaceae	2015	0	0	0	2015	200	0.03	178.24
A3155	A3	A	1997	-999	Rauvolfia	purpurascens	Apocynaceae	2016	1.93	0.00061	4.39	2016	200	0.03	178.24
A3156	A3	A	1997	-999	Chrysophyllum	venezuelanense	Sapotaceae	2013	0	0	0	2013	141	0.02	70.38
A3156	A3	A	1997	-999	Chrysophyllum	venezuelanense	Sapotaceae	2014	0	0	0	2014	141	0.02	70.38
A3156	A3	A	1997	-999	Chrysophyllum	venezuelanense	Sapotaceae	2015	1.03	0.00023	1.43	2015	141	0.02	70.38
A3156	A3	A	1997	-999	Chrysophyllum	venezuelanense	Sapotaceae	2016	6.74	0.00154	9.83	2016	142	0.02	71.78
A3157	A3	A	1997	-999	Dendropanax	arboreus	Araliaceae	2013	0.98	0.00065	5.47	2013	423	0.14	1051.26
A3157	A3	A	1997	-999	Dendropanax	arboreus	Araliaceae	2014	0.95	0.00063	5.31	2014	424	0.14	1056.83
A3157	A3	A	1997	-999	Dendropanax	arboreus	Araliaceae	2015	1.03	0.00069	5.74	2015	425	0.14	1062.42
A3157	A3	A	1997	-999	Dendropanax	arboreus	Araliaceae	2016	0.96	0.00065	5.41	2016	426	0.14	1068.02
A316	A3	A	1997	-999	Protium	pittieri	Burseraceae	2013	3.92	0.00135	9.99	2013	217	0.04	218.88
A316	A3	A	1997	-999	Protium	pittieri	Burseraceae	2014	6.65	0.00235	17.48	2014	221	0.04	229.06
A316	A3	A	1997	-999	Protium	pittieri	Burseraceae	2015	6.22	0.00226	16.94	2015	228	0.04	247.45
A316	A3	A	1997	-999	Protium	pittieri	Burseraceae	2016	6.67	0.00249	18.81	2016	234	0.04	263.79
A3160	A3	A	1997	-999	Rauvolfia	purpurascens	Apocynaceae	2013	1.96	0.00067	4.91	2013	215	0.04	213.87
A3160	A3	A	1997	-999	Rauvolfia	purpurascens	Apocynaceae	2014	2.85	0.00098	7.24	2014	217	0.04	218.88
A3160	A3	A	1997	-999	Rauvolfia	purpurascens	Apocynaceae	2015	1.03	0.00036	2.63	2015	220	0.04	226.49
A3160	A3	A	1997	-999	Rauvolfia	purpurascens	Apocynaceae	2016	3.85	0.00135	10.04	2016	221	0.04	229.06
A3161	A3	A	1997	-999	Dussia	macroprophyllata	Fabaceae	2013	2.94	0.00052	2.81	2013	110	0.01	34.35
A3161	A3	A	1997	-999	Dussia	macroprophyllata	Fabaceae	2014	2.85	0.00051	2.85	2014	113	0.01	37.22
A3161	A3	A	1997	-999	Dussia	macroprophyllata	Fabaceae	2015	0	0	0	2015	116	0.01	40.22
A3161	A3	A	1997	-999	Dussia	macroprophyllata	Fabaceae	2016	2.89	0.00053	3.02	2016	116	0.01	40.22
A3162	A3	P	1997	-999	Welfia	regia	Arecaceae	2013	0	0	0	2013	181	0.03	137.88
A3162	A3	P	1997	-999	Welfia	regia	Arecaceae	2014	0	0	0	2014	181	0.03	137.88
A3162	A3	P	1997	-999	Welfia	regia	Arecaceae	2015	0	0	0	2015	181	0.03	137.88
A3162	A3	P	1997	-999	Welfia	regia	Arecaceae	2016	0	0	0	2016	181	0.03	137.88
A3163	A3	A	1997	-999	Virola	sebifera	Myristicaceae	2013	0	0	0	2013	350	0.1	684.44
A3163	A3	A	1997	-999	Virola	sebifera	Myristicaceae	2014	0	0	0	2014	350	0.1	684.44
A3163	A3	A	1997	-999	Virola	sebifera	Myristicaceae	2015	2.05	0.00113	9.23	2015	350	0.1	684.44
A3163	A3	A	1997	-999	Virola	sebifera	Myristicaceae	2016	4.82	0.00268	21.92	2016	352	0.1	693.44
A3164	A3	A	1997	-999	Goethalsia	meiantha	Malvaceae	2013	0.98	0.00101	8.81	2013	653	0.33	2722.69
A3164	A3	A	1997	-999	Goethalsia	meiantha	Malvaceae	2014	0	0	0	2014	654	0.34	2731.67
A3164	A3	A	1997	-999	Goethalsia	meiantha	Malvaceae	2015	3.08	0.00317	27.7	2015	654	0.34	2731.67
A3164	A3	A	1997	-999	Goethalsia	meiantha	Malvaceae	2016	2.89	0.00299	26.15	2016	657	0.34	2758.69
A3165	A3	P	1997	-999	Socratea	exorrhiza	Arecaceae	2013	0	0	0	2013	138	0.01	66.27
A3165	A3	P	1997	-999	Socratea	exorrhiza	Arecaceae	2014	0	0	0	2014	138	0.01	66.27
A3165	A3	P	1997	-999	Socratea	exorrhiza	Arecaceae	2015	0	0	0	2015	138	0.01	66.27
A3165	A3	P	1997	-999	Socratea	exorrhiza	Arecaceae	2016	0	0	0	2016	138	0.01	66.27
A3167	A3	A	1997	-999	Rauvolfia	purpurascens	Apocynaceae	2013	0	0	0	2013	142	0.02	71.78
A3167	A3	A	1997	-999	Rauvolfia	purpurascens	Apocynaceae	2014	0	0	0	2014	142	0.02	71.78
A3167	A3	A	1997	-999	Rauvolfia	purpurascens	Apocynaceae	2015	1.03	0.00023	1.45	2015	142	0.02	71.78
A3167	A3	A	1997	-999	Rauvolfia	purpurascens	Apocynaceae	2016	0.96	0.00022	1.38	2016	143	0.02	73.19
A3170	A3	A	1997	-999	Cassipourea	elliptica	Rhizophoraceae	2013	0	0	0	2013	146	0.02	77.52
A3170	A3	A	1997	-999	Cassipourea	elliptica	Rhizophoraceae	2014	0.95	0.00022	1.4	2014	146	0.02	77.52
A3170	A3	A	1997	-999	Cassipourea	elliptica	Rhizophoraceae	2015	2.05	0.00048	3.07	2015	147	0.02	78.99
A3170	A3	A	1997	-999	Cassipourea	elliptica	Rhizophoraceae	2016	3.85	0.00091	5.93	2016	149	0.02	81.98
A3171	A3	A	1997	-999	Pentaclethra	macroloba	Fabaceae	2013	2.94	0.00285	24.81	2013	615	0.3	2392.55
A3171	A3	A	1997	-999	Pentaclethra	macroloba	Fabaceae	2014	2.85	0.00277	24.16	2014	618	0.3	2417.84
A3171	A3	A	1997	-999	Pentaclethra	macroloba	Fabaceae	2015	3.08	0.00301	26.2	2015	621	0.3	2443.26
A3171	A3	A	1997	-999	Pentaclethra	macroloba	Fabaceae	2016	2.89	0.00284	24.74	2016	624	0.31	2468.81
A3173	A3	A	1997	-999	Ilex	skutchii	Aquifoliaceae	2013	0	0	0	2013	165	0.02	108.04
A3173	A3	A	1997	-999	Ilex	skutchii	Aquifoliaceae	2014	0	0	0	2014	165	0.02	108.04
A3173	A3	A	1997	-999	Ilex	skutchii	Aquifoliaceae	2015	0	0	0	2015	165	0.02	108.04
A3173	A3	A	1997	-999	Ilex	skutchii	Aquifoliaceae	2016	0	0	0	2016	165	0.02	108.04
A3174	A3	A	1997	2016	Miconia	multispicata	Melastomataceae	2013	10.79	0.00304	21.17	2013	174	0.02	124.36
A3174	A3	A	1997	2016	Miconia	multispicata	Melastomataceae	2014	5.7	0.00168	11.9	2014	185	0.03	145.93
A3175	A3	P	1997	-999	Socratea	exorrhiza	Arecaceae	2013	0	0	0	2013	136	0.01	63.61
A3175	A3	P	1997	-999	Socratea	exorrhiza	Arecaceae	2014	0	0	0	2014	136	0.01	63.61
A3175	A3	P	1997	-999	Socratea	exorrhiza	Arecaceae	2015	0	0	0	2015	136	0.01	63.61
A3175	A3	P	1997	-999	Socratea	exorrhiza	Arecaceae	2016	0	0	0	2016	136	0.01	63.61
A3176	A3	P	1997	-999	Welfia	regia	Arecaceae	2013	0	0	0	2013	167	0.02	111.56
A3176	A3	P	1997	-999	Welfia	regia	Arecaceae	2014	0	0	0	2014	167	0.02	111.56
A3176	A3	P	1997	-999	Welfia	regia	Arecaceae	2015	0	0	0	2015	167	0.02	111.56
A3176	A3	P	1997	-999	Welfia	regia	Arecaceae	2016	0	0	0	2016	167	0.02	111.56
A3177	A3	A	1997	-999	Ilex	skutchii	Aquifoliaceae	2013	15.7	0.0056	41.83	2013	219	0.04	223.94
A3177	A3	A	1997	-999	Ilex	skutchii	Aquifoliaceae	2014	4.75	0.00177	13.4	2014	235	0.04	266.57
A3177	A3	A	1997	-999	Ilex	skutchii	Aquifoliaceae	2015	7.18	0.00275	20.87	2015	240	0.05	280.67
A3177	A3	A	1997	-999	Ilex	skutchii	Aquifoliaceae	2016	4.82	0.00189	14.43	2016	247	0.05	301.02
A3178	A3	A	1997	-999	Warszewiczia	coccinea	Rubiaceae	2013	1.96	0.00048	3.2	2013	156	0.02	92.92
A3178	A3	A	1997	-999	Warszewiczia	coccinea	Rubiaceae	2014	1.9	0.00047	3.15	2014	158	0.02	96.17
A3178	A3	A	1997	-999	Warszewiczia	coccinea	Rubiaceae	2015	0	0	0	2015	160	0.02	99.49
A3178	A3	A	1997	-999	Warszewiczia	coccinea	Rubiaceae	2016	0.96	0.00024	1.62	2016	160	0.02	99.49
A318	A3	A	1997	-999	Warszewiczia	coccinea	Rubiaceae	2013	0	0	0	2013	212	0.04	206.48
A318	A3	A	1997	-999	Warszewiczia	coccinea	Rubiaceae	2014	0.95	0.00032	2.33	2014	212	0.04	206.48
A318	A3	A	1997	-999	Warszewiczia	coccinea	Rubiaceae	2015	0	0	0	2015	213	0.04	208.93
A318	A3	A	1997	-999	Warszewiczia	coccinea	Rubiaceae	2016	0	0	0	2016	213	0.04	208.93
A3181	A3	A	1997	-999	Clarisia	mexicana	Moraceae	2013	13.74	0.00639	50.63	2013	289	0.07	438.41
A3181	A3	A	1997	-999	Clarisia	mexicana	Moraceae	2014	8.55	0.00413	32.98	2014	303	0.07	490.01
A3181	A3	A	1997	-999	Clarisia	mexicana	Moraceae	2015	6.15	0.00304	24.4	2015	312	0.08	524.71
A3181	A3	A	1997	-999	Clarisia	mexicana	Moraceae	2016	10.59	0.00538	43.35	2016	318	0.08	548.51
A3182	A3	A	1997	-999	Chrysophyllum	venezuelanense	Sapotaceae	2013	0.98	0.00029	2.07	2013	189	0.03	154.22
A3182	A3	A	1997	-999	Chrysophyllum	venezuelanense	Sapotaceae	2014	0	0	0	2014	190	0.03	156.33
A3182	A3	A	1997	-999	Chrysophyllum	venezuelanense	Sapotaceae	2015	1.03	0.00031	2.18	2015	190	0.03	156.33
A3182	A3	A	1997	-999	Chrysophyllum	venezuelanense	Sapotaceae	2016	0	0	0	2016	191	0.03	158.45
A3183	A3	A	1997	-999	Goethalsia	meiantha	Malvaceae	2013	18.64	0.01873	163.48	2013	630	0.31	2520.32
A3183	A3	A	1997	-999	Goethalsia	meiantha	Malvaceae	2014	13.31	0.01371	119.95	2014	649	0.33	2686.93
A3183	A3	A	1997	-999	Goethalsia	meiantha	Malvaceae	2015	9.23	0.00968	84.74	2015	663	0.35	2813.12
A3183	A3	A	1997	-999	Goethalsia	meiantha	Malvaceae	2016	8.67	0.00921	80.75	2016	672	0.35	2895.78
A3185	A3	A	1997	-999	Ocotea	hartshorniana	Lauraceae	2013	7.85	0.00205	13.83	2013	162	0.02	102.86
A3185	A3	A	1997	-999	Ocotea	hartshorniana	Lauraceae	2014	5.7	0.00155	10.64	2014	170	0.02	116.96
A3185	A3	A	1997	-999	Ocotea	hartshorniana	Lauraceae	2015	6.15	0.00173	12.02	2015	176	0.02	128.15
A3185	A3	A	1997	-999	Ocotea	hartshorniana	Lauraceae	2016	10.59	0.00312	22.03	2016	182	0.03	139.87
A3186	A3	P	1997	-999	Welfia	regia	Arecaceae	2013	0	0	0	2013	170	0.02	116.96
A3186	A3	P	1997	-999	Welfia	regia	Arecaceae	2014	0	0	0	2014	170	0.02	116.96
A3186	A3	P	1997	-999	Welfia	regia	Arecaceae	2015	0	0	0	2015	170	0.02	116.96
A3186	A3	P	1997	-999	Welfia	regia	Arecaceae	2016	0	0	0	2016	170	0.02	116.96
A3187	A3	A	1997	-999	Goethalsia	meiantha	Malvaceae	2013	11.77	0.00599	48.27	2013	318	0.08	548.51
A3187	A3	A	1997	-999	Goethalsia	meiantha	Malvaceae	2014	17.11	0.00911	73.95	2014	330	0.09	597.71
A3187	A3	A	1997	-999	Goethalsia	meiantha	Malvaceae	2015	2.05	0.00112	9.17	2015	348	0.1	675.5
A3187	A3	A	1997	-999	Goethalsia	meiantha	Malvaceae	2016	2.89	0.0016	13.02	2016	350	0.1	684.44
A3188	A3	A	1997	-999	Parathesis	trichogyne	Primulaceae	2013	0	0	0	2013	118	0.01	42.29
A3188	A3	A	1997	-999	Parathesis	trichogyne	Primulaceae	2014	0	0	0	2014	118	0.01	42.29
A3188	A3	A	1997	-999	Parathesis	trichogyne	Primulaceae	2015	0	0	0	2015	118	0.01	42.29
A3188	A3	A	1997	-999	Parathesis	trichogyne	Primulaceae	2016	1.93	0.00036	2.05	2016	118	0.01	42.29
A3189	A3	A	1997	-999	Pentaclethra	macroloba	Fabaceae	2013	3.92	0.00454	40.02	2013	734	0.42	3497.74
A3189	A3	A	1997	-999	Pentaclethra	macroloba	Fabaceae	2014	2.85	0.00331	29.23	2014	738	0.43	3538.53
A3189	A3	A	1997	-999	Pentaclethra	macroloba	Fabaceae	2015	2.05	0.00239	21.09	2015	741	0.43	3569.28
A3189	A3	A	1997	-999	Pentaclethra	macroloba	Fabaceae	2016	1.93	0.00225	19.87	2016	743	0.43	3589.85
A319	A3	A	1997	-999	Dendropanax	arboreus	Araliaceae	2013	0	0	0	2013	384	0.12	845.48
A319	A3	A	1997	-999	Dendropanax	arboreus	Araliaceae	2014	0	0	0	2014	384	0.12	845.48
A319	A3	A	1997	-999	Dendropanax	arboreus	Araliaceae	2015	0	0	0	2015	384	0.12	845.48
A319	A3	A	1997	-999	Dendropanax	arboreus	Araliaceae	2016	0.95	0.00058	4.76	2016	384	0.12	845.48
A3190	A3	P	1997	-999	Socratea	exorrhiza	Arecaceae	2013	1.96	0.00044	2.82	2013	143	0.02	73.19
A3190	A3	P	1997	-999	Socratea	exorrhiza	Arecaceae	2014	0	0	0	2014	145	0.02	76.06
A3190	A3	P	1997	-999	Socratea	exorrhiza	Arecaceae	2015	0	0	0	2015	145	0.02	76.06
A3190	A3	P	1997	-999	Socratea	exorrhiza	Arecaceae	2016	0	0	0	2016	145	0.02	76.06
A3191	A3	A	1997	-999	Spachea	correae	Malpighiaceae	2013	10.79	0.00409	31.07	2013	236	0.04	269.36
A3191	A3	A	1997	-999	Spachea	correae	Malpighiaceae	2014	8.55	0.00338	25.89	2014	247	0.05	301.02
A3191	A3	A	1997	-999	Spachea	correae	Malpighiaceae	2015	11.28	0.00463	35.81	2015	256	0.05	328.27
A3191	A3	A	1997	-999	Spachea	correae	Malpighiaceae	2016	11.56	0.00496	38.66	2016	267	0.06	363.19
A3192	A3	A	1997	-999	Rinorea	deflexiflora	Violaceae	2013	0	0	0	2013	105	0.01	29.88
A3192	A3	A	1997	-999	Rinorea	deflexiflora	Violaceae	2014	0.95	0.00016	0.82	2014	105	0.01	29.88
A3192	A3	A	1997	-999	Rinorea	deflexiflora	Violaceae	2015	0	0	0	2015	106	0.01	30.74
A3192	A3	A	1997	-999	Rinorea	deflexiflora	Violaceae	2016	0	0	0	2016	106	0.01	30.74
A3193	A3	P	1997	-999	Socratea	exorrhiza	Arecaceae	2013	23.55	0.00695	49.15	2013	176	0.02	128.15
A3193	A3	P	1997	-999	Socratea	exorrhiza	Arecaceae	2014	0	0	0	2014	200	0.03	178.24
A3193	A3	P	1997	-999	Socratea	exorrhiza	Arecaceae	2015	0	0	0	2015	200	0.03	178.24
A3193	A3	P	1997	-999	Socratea	exorrhiza	Arecaceae	2016	0	0	0	2016	200	0.03	178.24
A3195	A3	A	1997	-999	Warszewiczia	coccinea	Rubiaceae	2013	0.98	0.00024	1.62	2013	158	0.02	96.17
A3195	A3	A	1997	-999	Warszewiczia	coccinea	Rubiaceae	2014	2.85	0.00072	4.79	2014	159	0.02	97.82
A3195	A3	A	1997	-999	Warszewiczia	coccinea	Rubiaceae	2015	2.05	0.00053	3.52	2015	162	0.02	102.86
A3195	A3	A	1997	-999	Warszewiczia	coccinea	Rubiaceae	2016	3.85	0.001	6.79	2016	164	0.02	106.3
A3196	A3	A	1997	-999	Casearia	arborea	Salicaceae	2013	6.87	0.0019	13.17	2013	173	0.02	122.48
A3196	A3	A	1997	-999	Casearia	arborea	Salicaceae	2014	7.6	0.0022	15.42	2014	180	0.03	135.9
A3196	A3	A	1997	-999	Casearia	arborea	Salicaceae	2015	3.08	0.00092	6.49	2015	188	0.03	152.13
A3196	A3	A	1997	-999	Casearia	arborea	Salicaceae	2016	4.82	0.00146	10.44	2016	191	0.03	158.45
A3197	A3	A	1997	-999	Warszewiczia	coccinea	Rubiaceae	2013	2.94	0.00107	8.04	2013	230	0.04	252.84
A3197	A3	A	1997	-999	Warszewiczia	coccinea	Rubiaceae	2014	1.9	0.0007	5.26	2014	233	0.04	261.03
A3197	A3	A	1997	-999	Warszewiczia	coccinea	Rubiaceae	2015	3.08	0.00114	8.63	2015	235	0.04	266.57
A3197	A3	A	1997	-999	Warszewiczia	coccinea	Rubiaceae	2016	1.93	0.00072	5.47	2016	238	0.04	274.98
A3198	A3	A	1997	-999	Warszewiczia	coccinea	Rubiaceae	2013	2.94	0.00074	4.95	2013	159	0.02	97.82
A3198	A3	A	1997	-999	Warszewiczia	coccinea	Rubiaceae	2014	0.95	0.00024	1.63	2014	162	0.02	102.86
A3198	A3	A	1997	-999	Warszewiczia	coccinea	Rubiaceae	2015	1.03	0.00026	1.77	2015	163	0.02	104.57
A3198	A3	A	1997	-999	Warszewiczia	coccinea	Rubiaceae	2016	0	0	0	2016	164	0.02	106.3
A32	A3	P	1997	-999	Welfia	regia	Arecaceae	2013	0	0	0	2013	177	0.02	130.06
A32	A3	P	1997	-999	Welfia	regia	Arecaceae	2014	0	0	0	2014	177	0.02	130.06
A32	A3	P	1997	-999	Welfia	regia	Arecaceae	2015	0	0	0	2015	177	0.02	130.06
A32	A3	P	1997	-999	Welfia	regia	Arecaceae	2016	0	0	0	2016	177	0.02	130.06
A320	A3	A	1997	-999	Eschweilera	collinsii	Lecythidaceae	2013	0	0	0	2013	356	0.1	711.62
A320	A3	A	1997	-999	Eschweilera	collinsii	Lecythidaceae	2014	0.95	0.00053	4.35	2014	356	0.1	711.62
A320	A3	A	1997	-999	Eschweilera	collinsii	Lecythidaceae	2015	0	0	0	2015	357	0.1	716.2
A320	A3	A	1997	-999	Eschweilera	collinsii	Lecythidaceae	2016	0	0	0	2016	357	0.1	716.2
A3202	A3	A	1997	-999	Dendropanax	arboreus	Araliaceae	2013	2.94	0.0019	15.88	2013	410	0.13	980.16
A3202	A3	A	1997	-999	Dendropanax	arboreus	Araliaceae	2014	3.8	0.00248	20.71	2014	413	0.13	996.35
A3202	A3	A	1997	-999	Dendropanax	arboreus	Araliaceae	2015	0	0	0	2015	417	0.14	1018.14
A3202	A3	A	1997	-999	Dendropanax	arboreus	Araliaceae	2016	4.82	0.00317	26.55	2016	417	0.14	1018.14
A3203	A3	A	1997	-999	Brosimum	lactescens	Moraceae	2013	2.94	0.00089	6.38	2013	192	0.03	160.59
A3203	A3	A	1997	-999	Brosimum	lactescens	Moraceae	2014	2.85	0.00088	6.31	2014	195	0.03	167.1
A3203	A3	A	1997	-999	Brosimum	lactescens	Moraceae	2015	3.08	0.00096	6.94	2015	198	0.03	173.74
A3203	A3	A	1997	-999	Brosimum	lactescens	Moraceae	2016	2.89	0.00092	6.65	2016	201	0.03	180.51
A3204	A3	A	1997	-999	Swartzia	nicaraguensis	Fabaceae	2013	0.98	0.00026	1.72	2013	165	0.02	108.04
A3204	A3	A	1997	-999	Swartzia	nicaraguensis	Fabaceae	2014	0	0	0	2014	166	0.02	109.79
A3204	A3	A	1997	-999	Swartzia	nicaraguensis	Fabaceae	2015	1.03	0.00027	1.81	2015	166	0.02	109.79
A3204	A3	A	1997	-999	Swartzia	nicaraguensis	Fabaceae	2016	0	0	0	2016	167	0.02	111.56
A3206	A3	A	1997	-999	Dussia	sp. B	Fabaceae	2013	22.57	0.00767	56.62	2013	205	0.03	189.75
A3206	A3	A	1997	-999	Dussia	sp. B	Fabaceae	2014	15.21	0.00564	42.55	2014	228	0.04	247.45
A3206	A3	A	1997	-999	Dussia	sp. B	Fabaceae	2015	14.35	0.00566	43.34	2015	244	0.05	292.21
A3206	A3	A	1997	-999	Dussia	sp. B	Fabaceae	2016	10.59	0.00438	33.95	2016	258	0.05	334.48
A3208	A3	A	1997	-999	Warszewiczia	coccinea	Rubiaceae	2013	1.96	0.0006	4.27	2013	193	0.03	162.75
A3208	A3	A	1997	-999	Warszewiczia	coccinea	Rubiaceae	2014	0.95	0.00029	2.09	2014	195	0.03	167.1
A3208	A3	A	1997	-999	Warszewiczia	coccinea	Rubiaceae	2015	1.03	0.00032	2.27	2015	196	0.03	169.3
A3208	A3	A	1997	-999	Warszewiczia	coccinea	Rubiaceae	2016	0.96	0.0003	2.15	2016	197	0.03	171.51
A3209	A3	A	1997	-999	Quararibea	bracteolosa	Malvaceae	2013	0.98	0.00056	4.6	2013	363	0.1	743.99
A3209	A3	A	1997	-999	Quararibea	bracteolosa	Malvaceae	2014	0	0	0	2014	364	0.1	748.68
A3209	A3	A	1997	-999	Quararibea	bracteolosa	Malvaceae	2015	0	0	0	2015	364	0.1	748.68
A3209	A3	A	1997	-999	Quararibea	bracteolosa	Malvaceae	2016	0	0	0	2016	364	0.1	748.68
A321	A3	A	1997	-999	Rinorea	deflexiflora	Violaceae	2013	-1.96	-0.00048	-3.14	2013	156	0.02	92.92
A321	A3	A	1997	-999	Rinorea	deflexiflora	Violaceae	2014	0	0	0	2014	154	0.02	89.72
A321	A3	A	1997	-999	Rinorea	deflexiflora	Violaceae	2015	0	0	0	2015	154	0.02	89.72
A321	A3	A	1997	-999	Rinorea	deflexiflora	Violaceae	2016	0	0	0	2016	154	0.02	89.72
A3210	A3	P	1997	-999	Welfia	regia	Arecaceae	2013	0	0	0	2013	158	0.02	96.17
A3210	A3	P	1997	-999	Welfia	regia	Arecaceae	2014	0	0	0	2014	158	0.02	96.17
A3210	A3	P	1997	-999	Welfia	regia	Arecaceae	2015	0	0	0	2015	158	0.02	96.17
A3210	A3	P	1997	-999	Welfia	regia	Arecaceae	2016	0	0	0	2016	158	0.02	96.17
A3211	A3	A	1997	-999	Preslianthus	pittieri	Capparaceae	2013	0	0	0	2013	124	0.01	48.86
A3211	A3	A	1997	-999	Preslianthus	pittieri	Capparaceae	2014	0	0	0	2014	124	0.01	48.86
A3211	A3	A	1997	-999	Preslianthus	pittieri	Capparaceae	2015	0	0	0	2015	124	0.01	48.86
A3211	A3	A	1997	-999	Preslianthus	pittieri	Capparaceae	2016	0	0	0	2016	124	0.01	48.86
A3214	A3	A	1998	-999	Psychotria	panamensis	Rubiaceae	2013	0	0	0	2013	118	0.01	42.29
A3214	A3	A	1998	-999	Psychotria	panamensis	Rubiaceae	2014	0	0	0	2014	118	0.01	42.29
A3214	A3	A	1998	-999	Psychotria	panamensis	Rubiaceae	2015	0	0	0	2015	118	0.01	42.29
A3214	A3	A	1998	-999	Psychotria	panamensis	Rubiaceae	2016	0.95	0.00018	1.01	2016	118	0.01	42.29
A3217	A3	A	1998	-999	Dendropanax	arboreus	Araliaceae	2013	3.92	0.00181	14.29	2013	291	0.07	445.6
A3217	A3	A	1998	-999	Dendropanax	arboreus	Araliaceae	2014	4.75	0.00222	17.62	2014	295	0.07	460.17
A3217	A3	A	1998	-999	Dendropanax	arboreus	Araliaceae	2015	9.23	0.00441	35.17	2015	300	0.07	478.71
A3217	A3	A	1998	-999	Dendropanax	arboreus	Araliaceae	2016	7.7	0.00379	30.33	2016	309	0.07	513.01
A3218	A3	L	1999	-999				2013	1.96	0.00041	2.53	2013	133	0.01	59.72
A3218	A3	L	1999	-999				2014	0	0	0	2014	135	0.01	62.3
A3218	A3	L	1999	-999				2015	1.04	0.00022	1.36	2015	135	0.01	62.3
A3218	A3	L	1999	-999				2016	0.95	0.0002	1.26	2016	136	0.01	63.61
A3219	A3	P	1999	-999	Euterpe	precatoria	Arecaceae	2013	0	0	0	2013	118	0.01	42.29
A3219	A3	P	1999	-999	Euterpe	precatoria	Arecaceae	2014	0	0	0	2014	118	0.01	42.29
A3219	A3	P	1999	-999	Euterpe	precatoria	Arecaceae	2015	0	0	0	2015	118	0.01	42.29
A3219	A3	P	1999	-999	Euterpe	precatoria	Arecaceae	2016	0	0	0	2016	118	0.01	42.29
A322	A3	P	1997	-999	Welfia	regia	Arecaceae	2013	0	0	0	2013	153	0.02	88.14
A322	A3	P	1997	-999	Welfia	regia	Arecaceae	2014	0	0	0	2014	153	0.02	88.14
A322	A3	P	1997	-999	Welfia	regia	Arecaceae	2015	0	0	0	2015	153	0.02	88.14
A322	A3	P	1997	-999	Welfia	regia	Arecaceae	2016	0	0	0	2016	153	0.02	88.14
A3221	A3	A	1999	-999	Rinorea	deflexiflora	Violaceae	2013	4.91	0.00097	5.77	2013	124	0.01	48.86
A3221	A3	A	1999	-999	Rinorea	deflexiflora	Violaceae	2014	3.8	0.00078	4.73	2014	129	0.01	54.75
A3221	A3	A	1999	-999	Rinorea	deflexiflora	Violaceae	2015	3.08	0.00065	3.98	2015	133	0.01	59.72
A3221	A3	A	1999	-999	Rinorea	deflexiflora	Violaceae	2016	0	0	0	2016	136	0.01	63.61
A3222	A3	A	2000	-999	Dendropanax	arboreus	Araliaceae	2013	5.89	0.00187	13.51	2013	199	0.03	175.98
A3222	A3	A	2000	-999	Dendropanax	arboreus	Araliaceae	2014	7.6	0.0025	18.23	2014	205	0.03	189.75
A3222	A3	A	2000	-999	Dendropanax	arboreus	Araliaceae	2015	8.3	0.00283	20.87	2015	213	0.04	208.93
A3222	A3	A	2000	-999	Dendropanax	arboreus	Araliaceae	2016	6.67	0.00235	17.53	2016	221	0.04	229.06
A3223	A3	A	2000	-999	Siparuna	cuspidata	Siparunaceae	2013	0.98	0.00021	1.33	2013	138	0.01	66.27
A3223	A3	A	2000	-999	Siparuna	cuspidata	Siparunaceae	2014	2.85	0.00063	3.95	2014	139	0.02	67.63
A3223	A3	A	2000	-999	Siparuna	cuspidata	Siparunaceae	2015	0	0	0	2015	142	0.02	71.78
A3223	A3	A	2000	-999	Siparuna	cuspidata	Siparunaceae	2016	0.95	0.00021	1.35	2016	142	0.02	71.78
A3224	A3	A	2000	-999	Rinorea	deflexiflora	Violaceae	2013	0.98	0.00019	1.11	2013	123	0.01	47.73
A3224	A3	A	2000	-999	Rinorea	deflexiflora	Violaceae	2014	0	0	0	2014	124	0.01	48.86
A3224	A3	A	2000	-999	Rinorea	deflexiflora	Violaceae	2015	1.03	0.0002	1.18	2015	124	0.01	48.86
A3224	A3	A	2000	-999	Rinorea	deflexiflora	Violaceae	2016	0.96	0.00019	1.12	2016	125	0.01	50.01
A3225	A3	P	2000	-999	Welfia	regia	Arecaceae	2013	0	0	0	2013	183	0.03	141.88
A3225	A3	P	2000	-999	Welfia	regia	Arecaceae	2014	0	0	0	2014	183	0.03	141.88
A3225	A3	P	2000	-999	Welfia	regia	Arecaceae	2015	0	0	0	2015	183	0.03	141.88
A3225	A3	P	2000	-999	Welfia	regia	Arecaceae	2016	0	0	0	2016	183	0.03	141.88
A3226	A3	P	2000	-999	Welfia	regia	Arecaceae	2013	0	0	0	2013	162	0.02	102.86
A3226	A3	P	2000	-999	Welfia	regia	Arecaceae	2014	0	0	0	2014	162	0.02	102.86
A3226	A3	P	2000	-999	Welfia	regia	Arecaceae	2015	0	0	0	2015	162	0.02	102.86
A3226	A3	P	2000	-999	Welfia	regia	Arecaceae	2016	0	0	0	2016	162	0.02	102.86
A3229	A3	P	2002	-999	Euterpe	precatoria	Arecaceae	2013	0	0	0	2013	124	0.01	48.86
A3229	A3	P	2002	-999	Euterpe	precatoria	Arecaceae	2014	0	0	0	2014	124	0.01	48.86
A3229	A3	P	2002	-999	Euterpe	precatoria	Arecaceae	2015	1.03	0.0002	1.18	2015	124	0.01	48.86
A3229	A3	P	2002	-999	Euterpe	precatoria	Arecaceae	2016	0	0	0	2016	125	0.01	50.01
A3230	A3	L	2002	-999	Bauhinia		Fabaceae	2013	0.98	0.00036	2.68	2013	231	0.04	255.55
A3230	A3	L	2002	-999	Bauhinia		Fabaceae	2014	0	0	0	2014	232	0.04	258.29
A3230	A3	L	2002	-999	Bauhinia		Fabaceae	2015	1.03	0.00037	2.82	2015	232	0.04	258.29
A3230	A3	L	2002	-999	Bauhinia		Fabaceae	2016	0.96	0.00035	2.66	2016	233	0.04	261.03
A3232	A3	A	2002	-999	Hernandia	didymantha	Hernandiaceae	2013	6.87	0.00158	10.12	2013	143	0.02	73.19
A3232	A3	A	2002	-999	Hernandia	didymantha	Hernandiaceae	2014	3.8	0.00091	5.91	2014	150	0.02	83.5
A3232	A3	A	2002	-999	Hernandia	didymantha	Hernandiaceae	2015	2.05	0.0005	3.28	2015	154	0.02	89.72
[truncated: 86,435 more rows]
